1 **Robust representation of natural images by sparse and variable population of active**  
2 **neurons in visual cortex**

3

4 Takashi Yoshida<sup>1,2,3,\*</sup> and Kenichi Ohki<sup>1,2,3,4,\*</sup>

5 1. Department of Physiology, The University of Tokyo School of Medicine, Tokyo, Japan.

6 2. Department of Molecular Physiology, Graduate School of Medical Sciences, Kyushu University, Fukuoka,

7 Japan

8 3. CREST, Japan Science and Technology Agency, Tokyo, Japan

9 4. International Research Center for Neurointelligence (WPI-IRCN), The University of Tokyo, Hongo,

10 Bunkyo-ku, Tokyo 113-0033, Japan

11

12 \*Correspondence: Kenichi Ohki, kohki@m.u-tokyo.ac.jp

13 Takashi Yoshida, takashiy@m.u-tokyo.ac.jp

14

15 **Abstract**

16 Natural scenes sparsely activate neurons in the primary visual cortex (V1). However, whether and how  
17 sparsely active neurons sufficiently and robustly represent natural image contents has not been revealed. We  
18 reconstructed the natural images from neuronal activities of mouse V1. Single natural images were linearly  
19 decodable from surprisingly small number (~20) of highly responsive neurons. This was achieved by diverse  
20 receptive fields (RFs) of the small number of responsive neurons. Furthermore, these neurons robustly  
21 represented the image against trial-to-trial response variability. Synchronous neurons with partially  
22 overlapping RFs formed functional clusters and were active at the same trials. Importantly, multiple clusters  
23 represented similar patterns of local images but were active at different trials. Thus, integration of activities  
24 among the clusters led to robust representation against the variability. Our results suggest that the diverse,  
25 partially overlapping RFs ensure the sparse and robust representation, and propose a new representation  
26 scheme in which information is reliably represented, while representing neuronal patterns change across  
27 trials.  
28

## 29 **Introduction**

30 Sensory information is thought to be represented by relatively small number of active neurons in the sensory  
31 cortex. This sparse representation has been observed in several cortical areas<sup>1-9</sup> and is postulated to reflect an  
32 efficient coding of the statistical features in sensory inputs<sup>4, 10</sup>. However, it has not been determined whether  
33 and how small numbers of active neurons represent sufficient information about sensory inputs.

34 In the primary visual cortex (V1), a type of neuron termed a simple cell has a receptive field (RF)  
35 structure that is spatially localized, oriented, and has a bandpass filter property of specific spatial frequency.  
36 This RF structure is modelled by a two-dimensional (2D) Gabor function<sup>11</sup>. According to theoretical studies,  
37 single natural images are represented by relatively small numbers of neurons using Gabor-like RFs, whereas  
38 information about multiple natural scenes is distributed across the neuronal population<sup>10,12,13</sup>. Indeed, V1  
39 neurons respond sparsely to natural scenes at the single cell level<sup>2, 3, 5-9</sup> and population level<sup>3,5,14</sup>. Population  
40 activity with higher sparseness exhibits greater discriminability between natural scenes<sup>5</sup>.

41 What types of information from natural scenes are represented in sparsely active neuronal populations in  
42 a brain? The visual contents of natural scenes or movies are reconstructed from populations of single unit  
43 activities in the lateral geniculate nucleus (LGN) collected from several experiments<sup>15</sup> and functional magnetic  
44 resonance imaging (fMRI) data from the visual cortices<sup>16-19</sup>. However, it has not been addressed  
45 experimentally whether the visual contents of natural images are represented by small numbers of sparsely  
46 active neurons and whether V1 RFs in the brain are useful to represent the natural image. Furthermore, do the  
47 sparsely active neurons reliably represent the natural image contents against trial-to-trial response variability?  
48 Although a computational model<sup>20</sup> has suggested that sparse and overcomplete representation is  
49 optimal representation for natural images with unreliable neurons, this has not been examined  
50 experimentally.

51 We also addressed how visual information is distributed among neurons in a local population. It has been  
52 reported that subsets of neurons are ‘unresponsive’ to visual stimuli (e.g., a responsive rate for visual stimuli in  
53 mouse V1 of 26–68%)<sup>21-27</sup>, indicating subsets of neurons represent sensory information. However, this may

54 partly because stimulus properties do not completely cover RF properties of all neurons. Thus, there are two  
55 extreme possibilities; sparsely active neurons distributed among all neurons in a local population, or only a  
56 specific subset of cells processes the natural images. What proportion of neurons are actually involved in  
57 information processing has been debated<sup>28,29</sup>.

58 Here, we examined whether and how a small number of highly responsive V1 neurons was sufficient for  
59 the representation of natural image contents. Using two-photon  $\text{Ca}^{2+}$  imaging, we recorded visual responses to  
60 natural images from local populations of single neurons in V1 of anaesthetized mice. A small number of  
61 neurons (<3%) highly responded to each natural image, which was sparser than that predicted by linear  
62 encoding model. On the other hand, approximately 90% of neurons were activated by at least one of the  
63 natural images, revealing that most neurons in a local population are involved in natural image processing. We  
64 reconstructed the natural images from the activities to estimate the information about the visual contents.  
65 Visual contents of single natural images were linearly decodable from a small number (~20) of highly  
66 responsive neurons. The highly responsive neurons showed diverse RF, which helped small numbers of  
67 neurons represent complex natural images. Furthermore, the highly responsive neurons robustly represent the  
68 image against trial-to-trial response variability. We found that subsets of the neurons whose RFs partially  
69 overlapped formed functional clusters based on correlated activities. Importantly, between the clusters,  
70 represented local images were similar to each other, while across-trial response variabilities were almost  
71 independent. Thus, integration of activities among the clusters led to a robust representation. We also found  
72 that the responsive neurons were only slightly shared between images, and many natural images were  
73 represented by the combinations of responsive neurons in a population. Finally, visual features represented by  
74 a local population were sufficient to represent the features in all the natural images we used. These results  
75 revealed new robust representation of natural images by a small number of neurons in which information is  
76 reliably represented, while representing neuronal patterns change across trials. Preliminary results of this study  
77 have been published in an abstract form<sup>30</sup> and on a preprint server<sup>31</sup>.

78

## 79 **Results**

80 The main purpose of this study is to examine whether and how the natural images are represented in the sparse  
81 representation scheme. We first confirm the sparse response to natural images in our dataset. Next, we  
82 demonstrate that the natural images were reconstructed from a relatively small number of responsive neurons.  
83 Finally, we address how the small number of neurons robustly represent natural images against trial-to-trial  
84 response variability.

85

### 86 **Sparse visual responses to natural images in mouse V1**

87 We presented flashes of natural images as visual stimuli (Fig. 1a, see Methods) and simultaneously recorded  
88 the activities of several hundreds of single neurons from layers 2/3 and 4 of mouse V1 using two-photon  
89 calcium ( $\text{Ca}^{2+}$ ) imaging (560 [284–712] cells/plane, median [25–75<sup>th</sup> percentiles],  $n = 24$  planes from 14 mice,  
90 260–450 microns in depth, Fig. 1b for representative response traces). Fig. 1c presents plots of significant  
91 visual response events for all images (x-axis) across all neurons (y-axis) in a plane ( $n = 726$  cells, depth: 360  
92 microns from the brain surface). Significant response for each image was defined as an evoked response which  
93 was significantly different from 0 ( $p < 0.01$  using the signed-rank test) and whose normalized response  
94 amplitude (z-score) was greater than 1 (see Methods). Hereafter, we call these significant visual responses  
95 highly responsive. A few to 10% of neurons were highly responsive to a single image (5.1% [3.9–6.7%]  
96 cells/image, Fig. 1c bottom panel), indicating sparse visual responses to natural images. In contrast, nearly all  
97 neurons (98%, 711/726 cells) responded to at least one image (each cell responded 4.5% [2.5–7.5%] images,  
98 Fig. 1c right panel). Across planes, 2.7% cells were activated by a single image ([1.8–3.2%], Fig. 1f), whereas  
99 almost all cells responded to at least one image (90% [86–93%], Fig. 1g). This low responsive rate to each  
100 image was not due to poor recording conditions. The same neurons responded well to moving gratings (27%  
101 [22–34%] for one direction, and 75% [66–79%] for at least one of 8 directions, Fig. 1h and i).

102 The highly responsive neurons only slightly overlapped between images. Fig. 1d presents representative  
103 activity patterns for three natural images (Fig. 1d, left column). Each image activated different subsets of

104 neurons that exhibited small overlaps between images (Fig. 1d, right column). Of the responsive cells, 4.8%  
105 exhibited overlap between two images (25–75<sup>th</sup> percentiles for 24 planes: 4.0–5.5%, Fig. 1j). We further  
106 computed the distributions of the response amplitudes to single images (Fig. 1e). Only a small number of  
107 neurons exhibited visual responses with greater amplitudes, which is a characteristic property of a sparse  
108 representation (Fig. 1e). Population sparseness<sup>2, 3</sup>, a measure of sparse representation, was comparable to a  
109 previous report for mouse V1<sup>5</sup> (0.36 [0.30–0.42], Fig. 1k, see Methods). Thus, each natural image activated a  
110 relatively small number of neurons, whereas most neurons in a local population were activated by at least one  
111 of the images, suggesting the sparsely distributed representation of natural images in V1 that was originally  
112 proposed in a previous study<sup>10</sup>. The latter result also provides the first report that most neurons in mouse V1  
113 are visually responsive to natural image stimuli<sup>28, 29</sup>.

114

### 115 **Partially overlapping representations of visual features among local V1 populations**

116 We created encoding models for the visual responses of individual neurons to examine the visual features  
117 represented by each neuron. We used a set of Gabor wavelet filters (1248 filters, Supplementary Fig. 1a and b,  
118 see Methods) to extract the visual features from the natural images. Natural images were applied to each  
119 Gabor filter and transformed into sets of feature values (Gabor feature values). For each neuron, we first  
120 selected the Gabor features that exhibited strong correlations with the visual response. The correlation  
121 threshold for the selected feature was adjusted to maximize the visual response prediction (Supplementary Fig.  
122 1c–e, see Methods). Then, the visual response was represented by a linear regression of the selected feature  
123 values followed by a non-linear scaling (Fig. 2a, see Methods). The visual response prediction of the model  
124 was estimated with a different dataset from the dataset used in the regression (10-fold cross validation, see  
125 Methods).

126 Visual response of an individual neuron was represented by a small number of Gabor features. In the  
127 example cells (Fig. 2b and c), the correlation coefficients between the observed responses and the responses  
128 predicted by the model were 0.76 and 0.89. These neurons were represented by 19 and 13 Gabor features,

129 respectively (Fig. 2b and c, right panels), and their encoding filters (weighted sums of the Gabor filters) were  
130 spatially localized (Fig. 2b and c, insets in the right panels). In the representative plane presented in Fig. 1, the  
131 median of the prediction performance of the encoding model (i.e., the correlation coefficient between the  
132 observed and predicted responses) was 0.34 (25–75<sup>th</sup> percentiles: 0.16–0.52,  $n = 726$  cells, Supplementary Fig.  
133 1f), and the median performance of all cells across planes was 0.24 (25–75<sup>th</sup> percentiles: 0.07–0.45,  $n = 12755$   
134 cells across 24 planes, Supplementary Fig. 1i). An examination of the non-linear scaling function revealed that  
135 this step suppressed weak predicted responses and enhanced strong predicted responses (see Fig. 2d and e for a  
136 representative cell and average across planes, respectively), suggesting that this non-linear step enhanced the  
137 sparseness of the predicted response obtained from the linear step (i.e., linear regression by feature values). On  
138 average, 2.0% of the features (25/1248 features, 25–75<sup>th</sup> percentiles: 2.0–2.1%) were represented in each cell  
139 of the example plane (upper panels in Fig. 2f and Supplementary Fig. 1g), and 2.1% were represented in each  
140 cell of all recorded cells across all planes ( $\sim 26/1248$  features, 25–75<sup>th</sup> percentiles: 0.9–4.9%,  $n = 12755$  cells,  
141 Fig. 2h and Supplementary Fig. 1k). These features were related to the RF structure of each cell  
142 (Supplementary Fig. 2). The RF structure of each cell was estimated using the regularized inverse method<sup>32-34</sup>  
143 (see Methods). The regression weights of the Gabor features in the encoding model were positively correlated  
144 with the similarity between the corresponding Gabor filter and the RF structure (Supplementary Fig. 2a–d).

145 The Gabor features encoded in one cell partially overlapped with those of other cells in a local population  
146 (Fig. 2i). Among 19 and 13 Gabor features represented by the two example cells (Fig. 2b and c), only two  
147 features overlapped. For all cell pairs across all planes, the median overlap was 3.4% (25–75<sup>th</sup> percentile:  
148 0.0–9.6% relative to features represented by each cell, Fig. 2i and Supplementary Fig. 1h and 1l). The feature  
149 overlap between neurons was positively correlated with the similarity of RF structure (Supplementary Fig.  
150 2e–j). Based on these findings, the Gabor features encoded by individual neurons in a local population were  
151 highly diverse and partially overlapped.

152 The analysis of the encoding model also revealed how the individual Gabor features were encoded across  
153 neurons (upper left and bottom panels in Fig. 2f and g). As the spatial frequency (SF) of the Gabor filter

154 increased (i.e. the scale decreased), the corresponding feature contributed to the visual responses of fewer  
155 neurons (Fig. 2g). This pattern likely reflected the fact that Gabor filters with a low SF (i.e., a large scale)  
156 covered more of the neuron's RF, whereas Gabor filters with a high SF (i.e. a small scale) affected the  
157 responses of fewer neurons. Furthermore, almost all features contributed to the responses of at least one cell  
158 (100% in the plane presented in Fig. 2f and 100% [99.4–100%] across all planes, median [25–75<sup>th</sup> percentiles],  
159 Fig. 2j).

160

### 161 **Image reconstruction from the activities of the neuronal population**

162 The encoding model revealed the Gabor features represented by each neuron. We next examined whether the  
163 features encoded in a local population of neurons were sufficient to represent the visual contents of the natural  
164 images. We reconstructed stimulus images from the neuronal activities to evaluate information about visual  
165 contents in the population activity<sup>15-19</sup>. Using the same Gabor features as in the encoding model, each Gabor  
166 feature value was subjected to a linear regression of the neuronal activities of multiple neurons (Fig. 3a and  
167 Supplementary Fig. 3a). Each Gabor feature value was independently reconstructed. Then, the sets of  
168 reconstructed feature values were transformed into images (Fig. 3a, see Methods). The reconstruction  
169 performance was estimated with a different dataset from the dataset used in the regression (10-fold cross  
170 validation, see Methods).

171 We first used all simultaneously recorded neurons to reconstruct the image. In the examples of the plane  
172 ( $n = 726$  neurons, presented in Figs. 1 and 2), the rough structures of the stimulus images were reconstructed  
173 from the population activities (“All-cells” in Fig. 3b). The reconstruction performances (pixel-to-pixel  
174 correlations between stimulus images and reconstructed images) were 0.45 [0.36–0.56] (median [25–75<sup>th</sup>  
175 percentiles] of 200 images) in the representative plane ( $n = 726$  cells, Fig. 3c upper panel) and 0.36  
176 [0.31–0.38] across all planes ( $n = 24$  planes, “All cells” in Fig. 3d). Thus, the visual contents of natural images  
177 were extracted linearly from the neuronal activities of the local population in V1

178 The encoding model used in the previous section revealed how each neuron encodes the Gabor features



179 (Fig. 2f). We next examined whether these encoded features were sufficient for the representation of visual  
180 contents. In this analysis, each Gabor feature value was reconstructed with a subset of neurons selected using  
181 the encoding model (cell-selection model, Supplementary Fig. 3a, and see Methods). In this model, different  
182 subsets of neurons were used to reconstruct different features (Fig. 2f). Across all features, almost all neurons  
183 were used to reconstruct at least one feature (Fig. 2j). The examples of the reconstructed images from the  
184 cell-selection model are presented in Fig. 3b (Cell-selection). The reconstruction performance of the  
185 cell-selection model was comparable to or even slightly higher than the model using all cells ( $R = 0.49$   
186  $[0.37\text{--}0.59]$  for the representative plane, Fig 3c lower panel, and  $0.36 [0.32\text{--}0.39]$  for all planes, median  
187  $[25\text{--}75^{\text{th}}$  percentiles],  $p = 4.0 \times 10^{-4}$  using the signed-rank test, Fig. 3d). Thus, the Gabor features encoded in  
188 individual cells in a population captured sufficient information about the visual contents of the natural image.  
189 When the neurons were selected to maximize the reconstruction of each feature, the image reconstruction  
190 performance was only slightly improved (Supplementary Fig. 3b–h). Thus, main information about the visual  
191 contents was captured by the cell-selection model.

192

### 193 **Visual contents of natural images are linearly decodable from small numbers of responsive neurons**

194 Single natural images activated small numbers of neurons in a local population (Fig. 1). We next examined  
195 whether these small number of highly responsive neurons were sufficient to reconstruct a single image. For  
196 this purpose, we changed the number of neurons used in the reconstruction of each image and examined how  
197 many responsive neurons were sufficient for each image reconstruction. Parameters (weights and biases) of the  
198 cell-selection model were used in the reconstruction, and only the number of neurons used in the  
199 reconstruction was changed in this analysis.

200 Representative results are presented in Fig. 4a–c. In each image, neurons were sorted by visual response  
201 amplitude (descending order) first among the highly responsive neurons (red dots in Fig. 4a–c) and then  
202 among the remaining neurons (black dots in Fig. 4a–c). The image was reconstructed by top N neurons ( $N =$   
203  $1\text{--}726$  cells), and the reconstruction performances were plotted against the numbers of neurons used (Fig.

204 4a–d). All highly responsive neurons or even fewer neurons were sufficient to reconstruct the image to a level  
205 that was fairly comparable to the image created with all neurons (Fig. 4a–d). In summary, the performance of  
206 the highly responsive neurons was slightly better than the performance of all neurons (Representative plane:  $R$   
207 = 0.52 [0.40–0.64] for the responsive neurons and 0.49 [0.37–0.59] for all neurons, Fig. 4f. Across planes:  $R$  =  
208 0.38 [0.34–0.44] for the responsive neurons and 0.35 [0.31–0.40] for all neurons, median [25–75<sup>th</sup> percentiles],  
209  $p = 3.2 \times 10^{-4}$  using the signed-rank test,  $n = 24$  planes, Fig. 4g). On average, only approximately 20 neurons  
210 were sufficient to achieve 95% of the peak performance (vertical line in Fig. 4d). Thus, the visual contents of  
211 the single natural images were linearly decodable from small numbers of highly responsive neurons.

212 The features represented by individual neurons should be diverse to represent features in a natural image  
213 using a small number of neurons. Fig. 4e illustrates how individual responsive neurons contributed to the  
214 image reconstruction in the case presented in Fig 4a. Each neuron had a specific pattern of contributions  
215 (reverse filter: sum of Gabor filters  $\times$  weights, see Methods), and the patterns varied across neurons (Fig. 4e  
216 top panels), while partially overlapping in the visual field. In neuron pairs that were highly responsive to the  
217 same image, the number of overlapping Gabor features were slightly increased compared to all pairs, but the  
218 percentage was still less than 10% (7.1% [1.0–16%] of features for the all pairs and 8.1% [6.3–10%] of  
219 features for 24 planes, Fig. 4h–j, cf. Fig. 2g). These small overlaps and diversity in the represented features  
220 among neurons should be useful for the representation of natural images by the relatively small number of  
221 highly responsive neurons.

222

### 223 **Robust image representation by neurons with spatially overlapping representation**

224 We next examined whether a single image was robustly represented by the small number of responsive  
225 neurons. We computed reconstruction performance after dropping single cells (Fig. 5a and b. Cell # on the  
226 x-axis is the same as in Fig. 4d). Single cell-drop had only a small effect on the reconstructed image (middle  
227 panels in Fig. 5a). On average, at most 5% reduction of reconstruction performance was observed for the  
228 best-responding neurons, and there were almost no effects in most neurons (Fig. 5b). This indicates that an

229 image was robustly represented by highly responsive neurons against cell drop.

230 We found that this robustness was due to spatial overlap of representation patterns (i.e., reverse filters)  
231 among responsive neurons (Fig. 5c). We selected nine neurons which represented the upper part of the image  
232 and whose representation patterns spatially overlapped but variable in structure (overlapping cells, top panels  
233 in Fig. 5c and Supplementary Fig. 4). Although single-cell drop had almost no effect on the reconstructed local  
234 image (bottom panels in Fig. 5c), sequential drop of these cells gradually degraded the upper part of the  
235 reconstructed image (Fig. 5d). Pixel values in the overlapping area of the reconstructed image gradually  
236 decreased as the number of dropped cells increased (Fig. 5e and f). These results indicate that the robust image  
237 representation was due to neurons with spatially overlapping representation.

238

### 239 **Independent activities among subsets of neurons provide robust image representation against** 240 **trial-to-trial variability**

241 We further analyzed whether this overlapping representation is useful to reduce trial-to-trial variability of  
242 image representation. Cortical neurons often show trial-to-trial variability in response to repetitions of the  
243 same stimulus. If neurons with spatially overlapping representations showed independent or negatively  
244 correlated activities, integration of activities among these neurons should reduce the variability of image  
245 representations<sup>35,36</sup>.

246 Across-trial variability of the reconstructed images of the example case (shown in Fig. 5) is exhibited in  
247 Figure 6. Single-trial reconstructed images from all responsive neurons (57 cells) were mostly stable across  
248 trials and were distorted only in a few trials (e.g., trial 10, Fig. 6a). By contrast, reconstructed images from  
249 individual neurons were variable across trials (Fig. 6c). Importantly, some neuron pairs showed positively  
250 correlated representation across trials, other pairs showed almost independent representation across trials. Thus,  
251 integration of activities among the neurons with overlapping representation resulted in reliable representation  
252 across trials, even though the activity patterns of individual neurons were variable across trials (Fig. 6d).

253 Based on this observation, we hypothesized that some neurons which show positively correlated activities

254 form a functional cluster and work together, while neurons between different clusters show independent or  
255 negatively correlated activities to reduce variability of image representations. In the case shown in Fig. 6, the  
256 nine neurons formed three clusters based on their noise correlations (Fig. 7a and Supplementary Fig. 5a, see  
257 Methods). Neurons with overlapping representations usually formed two clusters (Fig. 7b). Importantly, the  
258 neuron pairs between different clusters exhibited almost zero or slightly negative correlations (between-cluster  
259 pair: -0.05 [-0.22–0.12], and within-cluster pair: 0.26 [0.09–0.42], median and 25-75<sup>th</sup> percentile, Fig. 7c, blue).  
260 This tendency was independent of the number of clusters (Supplementary Fig. 5i). Similarity of reverse filters  
261 for the within-cluster pair was almost comparable with that for the between-cluster pair (Supplementary Fig.  
262 5b), indicating that reverse filter structures did not simply explain the structure of noise correlation. Further,  
263 cortical positions of neurons did not explain the structure of noise correlation, because neurons in different  
264 clusters were spatially intermingled in FOVs (Supplementary Fig. 6).

265 We next compared reconstructed images obtained from different clusters (Supplementary Fig. 5c, d, h).  
266 Importantly, the images were similar between clusters (pixel-to-pixel correlation of reconstructed image: 0.33  
267 [0.11–0.52], median [25-75<sup>th</sup> percentile], Supplementary Fig. 5d), indicating that the clusters represented  
268 similar information. At single-trial, the reconstructed images from individual clusters were still variable across  
269 trials (Fig. 7d), due to the relatively high noise correlation within clusters. We further compared trial-to-trial  
270 variability of reconstructed images between clusters. As predicted from almost zero noise correlation between  
271 clusters, the trial-to-trial variability of reconstructed image was almost independent between the clusters (Fig.  
272 7d for the representative case and Supplementary Fig. 5e, i for summary data. Across-trial correlation  
273 coefficients of reconstructed images between clusters were: -0.08 [-0.25–0.09], median [25–75<sup>th</sup> percentile]).  
274 Integration of the multiple clusters resulted in more reliable image representation compared to individual  
275 clusters (Supplementary Fig. 5f). These results indicate that integration of activities among the clusters  
276 provides robust representation against trial-to-trial response variability.

277

278 **Representation of multiple natural images in a local population**

279 Finally, we examined how multiple natural images were represented in a population of responsive neurons  
280 (Fig. 8a–c). Figs. 8a and b provide an example of the representative plane shown in the previous figures ( $n =$   
281 726 cells). Natural images were sorted by reconstruction performance (y-axis in Fig. 8a), and the cells  
282 responding to each image are plotted in each row. First, as the number of images increased, new responsive  
283 cells are added, and the total number of responsive cells used for the reconstructions quickly increased (right  
284 end of the plot on each row, Fig. 8a). At approximately 50 images, the number of newly added responsive cells  
285 quickly decreased, and the increase in the total number of responsive cells slowed, indicating that the newly  
286 added image was represented by a combination of the already plotted responsive cells (i.e., the neurons that  
287 responded to other images), which was due to the small overlap in responsive cells between images (Fig. 1j).  
288 These findings are summarized in Figures 8b and c in which the number of newly added cells quickly  
289 decreased to zero as the number of images increased (red lines in Fig. 8b and c for the representative case and  
290 for all planes, respectively). Therefore, although only 4.8% responsive neurons overlapped between images  
291 (Fig. 1j), this small overlap is useful for the representation of many natural images by a limited number of  
292 responsive neurons.

293 We also analyzed whether the features represented by the local populations of the responsive neurons  
294 were sufficient to represent all features of the natural images. If the features in a local population are sufficient  
295 to represent all natural images, all features of the natural images should be accurately represented by the  
296 combination of features in the individual cells in a population. We represented a set of features in each image  
297 by linear regression of weights (i.e., features) of all responsive cells from the reconstruction model  
298 (cell-selection model) and computed the fitting errors (see Methods, Fig. 8d). The median error was less than  
299 10% for all images and all planes (8.2% [4.5–15.2%] for all image cases and 5.7% [4.9–16%],  $n = 24$  for the  
300 planes, Fig. 8e and f). Based on this result, features that sufficiently represent the visual contents of natural  
301 images are encoded in neurons in a local population.

302

303 **Discussion**

304 In the mouse V1, single natural images activated a small number of neurons (2.7%) which was sparser than  
305 that predicted by the linear model. The Gabor features represented in the individual neurons only slightly  
306 overlapped between neurons, indicating diverse representations. Visual contents of natural images were  
307 linearly decodable from the small number of active neurons (about 20 neurons), which was achieved by the  
308 diverse representations. A local part of the image was robustly represented by neurons whose representation  
309 patterns partially overlapped. These neurons with overlapping representation formed a small number of  
310 functional clusters which represented similar local image but were active independently across trials. Thus,  
311 integration of activities across the clusters led to robust representation against across-trial response variability.  
312 Further, small share of responsive neurons between the images helped a limited number of the responsive  
313 neurons to represent multiple natural images. Finally, the visual features represented by all the responsive  
314 neurons provided a good representation of the original visual features in the natural images.

315 Visual responses to natural images or movies in V1 are sparse at the single cell level (high lifetime  
316 sparseness)<sup>2,3,5-9</sup> and at the level of populations (population sparseness)<sup>3,5,6,14</sup>. Recently, recordings of local  
317 population activity using two-photon Ca<sup>2+</sup> imaging have enabled us to precisely evaluate the population  
318 sparseness<sup>5,14,37</sup>. We confirmed that a single natural image activated only a small number of neurons.  
319 Encoding model analysis indicated that visual responses in individual neurons were sparser than that predicted  
320 from a linear model (Fig. 2d, e). Here, this sparse activity was shown to contain sufficient and even robust  
321 information to represent the natural image contents. Image reconstruction is useful for evaluating the  
322 information contents represented by the neuronal activity and is widely used to analyze populations of single  
323 unit activities in response to natural scenes or movies in LGN<sup>15</sup> and fMRI data from several visual cortical  
324 areas<sup>16-19</sup>. The former<sup>15</sup> study used “pseudo-population” data collected from several experiments, and the latter  
325 studies<sup>16-19</sup> used blood oxygen level-dependent (BOLD) signals that indirectly reflect the average of local  
326 neuronal activity. Thus, it has not been examined whether and how the visual contents of natural images are  
327 represented in simultaneously recorded populations of single neurons in the cortex. We revealed that visual  
328 contents of single natural images were linearly decodable from relatively small number of responsive neurons

329 in a local population. It has been proposed that information is easy to be read out from the sparse  
330 representation<sup>4</sup>. Indeed, the sparse population activity increases the discriminability of two natural scenes by  
331 rendering the representations of the two scenes separable<sup>5</sup>. Our results extend this in that information about  
332 visual contents encoded in sparsely active neurons is linearly accessible, suggesting that downstream areas are  
333 easy to read out images from the sparse representation in V1.

334 The visual features encoded by individual neurons should be diverse so that a small number of active  
335 neurons represent the complex visual features of the image. Although RF structures in the local population of  
336 mouse V1 have already been reported<sup>21, 22, 33, 34</sup>, their diversity has not been analyzed with respect to natural  
337 image representation. In the present study, the visual features represented by sparsely active neurons were  
338 sufficiently diverse to represent visual contents of natural images. Computational models for natural image  
339 representation have suggested that sparse activity and number of available neurons affect diversity of RF  
340 structures<sup>20, 38-40</sup>.

341 We also demonstrated that sparsely active neurons robustly represented an image against trial-to-trial  
342 response variability. Although a computational model proposed sparse and overcomplete representation as  
343 optimal representation for natural images with unreliable neurons<sup>20</sup>, this has never been addressed  
344 experimentally. We demonstrated that the robust representation was mainly achieved by the diverse, partially  
345 overlapping representations, consistent with the overcomplete representation. It has been reported that  
346 subregions of receptive fields of some V1 neurons partially overlap<sup>21</sup>. Our results suggest that such overlap  
347 may be useful for the robust image representation. We further revealed that neurons with overlapping reverse  
348 filters formed functional clusters and integration across the clusters reduced the trial-to-trial variability,  
349 suggesting a new representation scheme in which information is reliably represented, while representing  
350 neuronal patterns change across trials. This seems to be similar to “drop-out” in deep learning<sup>41</sup> and may be  
351 useful to avoid overfitting and local minimum problems in learning.

352 Our analysis also revealed how multiple natural images were represented in a local population of  
353 responsive neurons. A single natural image activated specific subsets of neurons, whereas most neurons in a

354 local population responded to at least one of the images, supporting sparse, distributed code proposed in a  
355 previous study. The overlap of responsive neurons between images involved only 4.8% of the responsive cells  
356 (Fig. 1i). However, due to this small overlap, many natural images were represented by a limited number of  
357 responsive neurons (Fig. 5a–c). Furthermore, the features of all responsive neurons in a local population were  
358 sufficient to represent all the natural images used in the present study (Fig. 5d–f). Based on these findings,  
359 any natural image could be represented by a combination of responsive neurons in a local population.

360 In summary, this work highlighted how the visual contents of natural images are sufficiently and even  
361 robustly represented in sparsely active V1 neurons. The diverse, but partially overlapping representation helps  
362 the small number of neurons to represent a complex image robustly against across-trial variability. We propose  
363 a new representation scheme in which information is reliably represented with variable neuronal patterns  
364 across trials and which may be effective to avoid over-fitting in learning.

365

### 366 **Acknowledgements**

367 We thank Ms. Y. Sono, A. Hayashi, T. Inoue, A. Ohmori, A. Honda, M. Nakamichi for animal care, and all  
368 members of Ohki laboratory for support and discussions. This work was supported by grants from Core  
369 Research for Evolutionary Science and Technology (CREST)—Japan Agency for Medical Research and  
370 Development (AMED) (to K.O.), Japan Society for the Promotion of Science (JSPS) KAKENHI (Grant  
371 number 25221001 and 25117004 to K.O. and 15K16573, 17K13276 to T.Y.), International Research Center for  
372 Neurointelligence (WPI-IRCIN), JSPS (to K.O.), Brain Mapping by Integrated Neurotechnologies for Disease  
373 Studies (Brain/MINDS)—AMED (to K.O.), Strategic International Research Cooperative Program  
374 (SICP)—AMED (to K.O.), grants from the Ichiro Kanehara Foundation for the Promotion of Medical Sciences  
375 and Medical Care, and the Uehara Memorial Foundation (to T.Y.).

376

### 377 **Author contributions**

378 T.Y. and K.O. designed the research. T.Y. performed experiments. T.Y. and K.O. analyzed data and wrote the



379 manuscript. K.O. supervised the research.

380

### 381 **Competing financial interests.**

382 We declare no competing financial interests.

383

### 384 **References**

- 385 1. Rolls, E.T. & Tovee, M.J. Sparseness of the neuronal representation of stimuli in the primate  
386 temporal visual cortex. *J Neurophysiol* **73**, 713-726 (1995).
- 387 2. Vinje, W.E. & Gallant, J.L. Sparse Coding and Decorrelation in Primary Visual Cortex During  
388 Natural Vision. *Science* **287**, 1273-1276 (2000).
- 389 3. Weliky, M., Fiser, J., Hunt, R.H. & Wagner, D.N. Coding of natural scenes in primary visual  
390 cortex. *Neuron* **37**, 703-718 (2003).
- 391 4. Olshausen, B.A. & Field, D.J. Sparse coding of sensory inputs. *Curr Opin Neurobiol* **14**, 481-487  
392 (2004).
- 393 5. Froudarakis, E., *et al*. Population code in mouse V1 facilitates readout of natural scenes  
394 through increased sparseness. *Nat Neurosci* **17**, 851-857 (2014).
- 395 6. Yen, S.C., Baker, J. & Gray, C.M. Heterogeneity in the responses of adjacent neurons to natural  
396 stimuli in cat striate cortex. *J Neurophysiol* **97**, 1326-1341 (2007).
- 397 7. Yao, H., Shi, L., Han, F., Gao, H. & Dan, Y. Rapid learning in cortical coding of visual scenes.  
398 *Nat Neurosci* **10**, 772-778 (2007).
- 399 8. Tolhurst, D.J., Smyth, D. & Thompson, I.D. The sparseness of neuronal responses in ferret  
400 primary visual cortex. *J Neurosci* **29**, 2355-2370 (2009).
- 401 9. Willmore, B.D., Mazer, J.A. & Gallant, J.L. Sparse coding in striate and extrastriate visual  
402 cortex. *J Neurophysiol* **105**, 2907-2919 (2011).
- 403 10. Field, D.J. What Is the Goal of Sensory Coding. *Neural Comput* **6**, 559-601 (1994).
- 404 11. Jones, J.P. & Palmer, L.A. An evaluation of the two-dimensional Gabor filter model of simple  
405 receptive fields in cat striate cortex. *J Neurophysiol* **58**, 1233-1258 (1987).
- 406 12. Olshausen, B.A. & Field, D.J. Emergence of simple-cell receptive field properties by learning a  
407 sparse code for natural images. *Nature* **381**, 607-609 (1996).
- 408 13. Bell, A.J. & Sejnowski, T.J. The "independent components" of natural scenes are edge filters.  
409 *Vision Research* **37**, 3327-3338 (1997).
- 410 14. Tang, S., *et al*. Large-scale two-photon imaging revealed super-sparse population codes in the  
411 V1 superficial layer of awake monkeys. *Elife* **7** (2018).

- 412 15. Stanley, G.B., Li, F.F. & Dan, Y. Reconstruction of natural scenes from ensemble responses in  
413 the lateral geniculate nucleus. *J Neurosci* **19**, 8036-8042 (1999).
- 414 16. Miyawaki, Y., *et al*. Visual Image Reconstruction from Human Brain Activity using a  
415 Combination of Multiscale Local Image Decoders. *Neuron* **60**, 915-929 (2008).
- 416 17. Naselaris, T., Prenger, R.J., Kay, K.N., Oliver, M. & Gallant, J.L. Bayesian reconstruction of  
417 natural images from human brain activity. *Neuron* **63**, 902-915 (2009).
- 418 18. Nishimoto, S., *et al*. Reconstructing visual experiences from brain activity evoked by natural  
419 movies. *Curr Biol* **21**, 1641-1646 (2011).
- 420 19. Horikawa, T., Tamaki, M., Miyawaki, Y. & Kamitani, Y. Neural decoding of visual imagery  
421 during sleep. *Science* **340**, 639-642 (2013).
- 422 20. Doi, E. & Lewicki, M.S. Sparse Coding of Natural Images Using an Overcomplete Set of Limited  
423 Capacity Units. *In: Advances in Neural Information Processing Systems (NIPS 2004)* **17**, 377-384  
424 (2005).
- 425 21. Smith, S.L. & Hausser, M. Parallel processing of visual space by neighboring neurons in mouse  
426 visual cortex. *Nat Neurosci* **13**, 1144-1149 (2010).
- 427 22. Bonin, V., Histed, M.H., Yurgenson, S. & Reid, R.C. Local diversity and fine-scale organization  
428 of receptive fields in mouse visual cortex. *J Neurosci* **31**, 18506-18521 (2011).
- 429 23. Kampa, B.M., Roth, M.M., Gobel, W. & Helmchen, F. Representation of visual scenes by local  
430 neuronal populations in layer 2/3 of mouse visual cortex. *Front Neural Circuits* **5**, 18 (2011).
- 431 24. Ko, H., *et al*. Functional specificity of local synaptic connections in neocortical networks. *Nature*  
432 **473**, 87-91 (2011).
- 433 25. Marshel, J.H., Garrett, M.E., Nauhaus, I. & Callaway, E.M. Functional specialization of seven  
434 mouse visual cortical areas. *Neuron* **72**, 1040-1054 (2011).
- 435 26. Miller, J.e.K., Ayzenshtat, I., Carrillo-Reid, L. & Yuste, R. Visual stimuli recruit intrinsically  
436 generated cortical ensembles. *Proceedings of the National Academy of Sciences* **111**, E4053-E4061  
437 (2014).
- 438 27. Rikhye, R.V. & Sur, M. Spatial Correlations in Natural Scenes Modulate Response Reliability in  
439 Mouse Visual Cortex. *J Neurosci* **35**, 14661-14680 (2015).
- 440 28. Olshausen, B.A. & Field, D.J. How Close Are We to Understanding V1? *Neural Comput* **17**,  
441 1665-1699 (2005).
- 442 29. Shoham, S., O'Connor, D.H. & Segev, R. How silent is the brain: is there a "dark matter"  
443 problem in neuroscience? *J Comp Physiol A Neuroethol Sens Neural Behav Physiol* **192**, 777-784  
444 (2006).
- 445 30. Yoshida, T. & Ohki, K. Visual image reconstruction from neuronal activities in the mouse  
446 primary visual cortex. *Program No. 415.17. 2015 Neuroscience Meeting Planner. Chicago, IL:*

- 447 *Society for Neuroscience, 2015. Online.* (2015).
- 448 31. Yoshida, T. & Ohki, K. Representation of natural image contents by sparsely active neurons in  
449 visual cortex. *bioRxiv* (2018).
- 450 32. Smyth, D., Willmore, B., Baker, G.E., Thompson, I.D. & Tolhurst, D.J. The Receptive-Field  
451 Organization of Simple Cells in Primary Visual Cortex of Ferrets under Natural Scene Stimulation.  
452 *The Journal of Neuroscience* **23**, 4746-4759 (2003).
- 453 33. Ko, H., *et al.* The emergence of functional microcircuits in visual cortex. *Nature* **496**, 96-100  
454 (2013).
- 455 34. Cossell, L., *et al.* Functional organization of excitatory synaptic strength in primary visual  
456 cortex. *Nature* **518**, 399-403 (2015).
- 457 35. Shadlen, M.N. & Newsome, W.T. Noise, neural codes and cortical organization. *Current Opinion*  
458 *in Neurobiology* **4**, 569-579 (1994).
- 459 36. Zohary, E., Shadlen, M.N. & Newsome, W.T. Correlated neuronal discharge rate and its  
460 implications for psychophysical performance. *Nature* **370**, 140 (1994).
- 461 37. Greenberg, D.S., Houweling, A.R. & Kerr, J.N. Population imaging of ongoing neuronal activity  
462 in the visual cortex of awake rats. *Nat Neurosci* **11**, 749-751 (2008).
- 463 38. Rehn, M. & Sommer, F.T. A network that uses few active neurones to code visual input predicts  
464 the diverse shapes of cortical receptive fields. *J Comput Neurosci* **22**, 135-146 (2007).
- 465 39. Olshausen, B.A., Cadieu, C.F. & Warland, D.K. Learning real and complex overcomplete  
466 representations from the statistics of natural images. *SPIE Optical Engineering + Applications* **7446**,  
467 11 (2009).
- 468 40. Olshausen, B.A. Highly overcomplete sparse coding. **8651**, 86510S (2013).
- 469 41. Srivastava, N., Hinton, G., Krizhevsky, A., Sutskever, I. & Salakhutdinov, R. Dropout: a simple  
470 way to prevent neural networks from overfitting. *J. Mach. Learn. Res.* **15**, 1929-1958 (2014).
- 471 42. Nimmerjahn, A., Kirchhoff, F., Kerr, J.N. & Helmchen, F. Sulforhodamine 101 as a specific  
472 marker of astroglia in the neocortex in vivo. *Nat Methods* **1**, 31-37 (2004).
- 473 43. Ohki, K., Chung, S., Ch'ng, Y.H., Kara, P. & Reid, R.C. Functional imaging with cellular  
474 resolution reveals precise micro-architecture in visual cortex. *Nature* **433**, 597-603 (2005).
- 475 44. Hagihara, K.M., Murakami, T., Yoshida, T., Tagawa, Y. & Ohki, K. Neuronal activity is not  
476 required for the initial formation and maturation of visual selectivity. *Nat Neurosci* **18**, 1780-1788  
477 (2015).
- 478 45. Mank, M., *et al.* A genetically encoded calcium indicator for chronic in vivo two-photon imaging.  
479 *Nat Methods* **5**, 805-811 (2008).
- 480 46. van Hateren, J.H. & van der Schaaf, A. Independent component filters of natural images  
481 compared with simple cells in primary visual cortex. *Proc Biol Sci* **265**, 359-366 (1998).

- 482 47. Olmos, A. & Kingdom, F.A. A biologically inspired algorithm for the recovery of shading and  
483 reflectance images. *Perception* **33**, 1463-1473 (2004).
- 484 48. Peirce, J.W. Generating Stimuli for Neuroscience Using PsychoPy. *Front Neuroinform* **2**, 10  
485 (2008).
- 486 49. Kerlin, A.M., Andermann, M.L., Berezovskii, V.K. & Reid, R.C. Broadly tuned response  
487 properties of diverse inhibitory neuron subtypes in mouse visual cortex. *Neuron* **67**, 858-871 (2010).
- 488 50. Treves, A. & Rolls, E.T. What determines the capacity of autoassociative memories in the brain?  
489 *Network: Computation in Neural Systems* **2**, 371-397 (1991).
- 490 51. Lee, T.S. Image Representation Using 2D Gabor Wavelets. *IEEE Trans. Pattern Anal. Mach.*  
491 *Intell.* **18**, 959-971 (1996).
- 492 52. Kay, K.N., Naselaris, T., Prenger, R.J. & Gallant, J.L. Identifying natural images from human  
493 brain activity. *Nature* **452**, 352-355 (2008).
- 494 53. Bishop, C.M. *Pattern Recognition and Machine Learning (Information Science and Statistics)*  
495 (Springer-Verlag New York, Inc., 2006).

496

## 497 **Methods**

498 All experimental procedures were approved by the local Animal Use and Care Committee of Kyushu  
499 University.

500

### 501 **Animal preparation for two-photon imaging**

502 C57BL/6 mice (male and female) were used (Japan SLC Inc., Shizuoka, Japan). Mice were anaesthetized with  
503 isoflurane (5 % for induction, 1.5 % for maintenance during surgery, ~0.5% during imaging with a sedation of  
504 < 0.5mg/kg chlorprothixene, Sigma-Aldrich, St. Louis, MO, USA). The head skin was removed from the head,  
505 and the skull over the cortex was exposed. A custom-made metal plate for head fixation was attached with  
506 dental cement (Super Bond, Sun Medical, Shiga, Japan), and a craniotomy (~3mm in diameters) was  
507 performed over the primary visual cortex (center position: 0–1 mm anterior to lambda, +2.5–3mm lateral to  
508 the midline). A mixture of 0.8 mM Oregon Green BAPTA1-AM (OGB1, Life Technologies, Grand Island, NY,  
509 USA) dissolved with 10% Pluronic (Life Technologies) and 0.025 mM sulforhodamine 101<sup>42</sup> (SR101,  
510 Sigma-Aldrich) was pressure-injected with a Picospritzer III (Parker Hannifin, Cleveland, OH, USA) at the

511 depth of 300–500  $\mu\text{m}$  from the brain surface. The cranial window was sealed with a coverslip and dental  
512 cement. The imaging experiment began at least one hour after the OGB1 injection.

513

#### 514 **Two-photon $\text{Ca}^{2+}$ imaging.**

515 Imaging was performed with a two-photon microscope (A1R MP, Nikon, Tokyo, Japan) equipped with a 25 $\times$   
516 objective (NA 1.10, PlanApo, Nikon) and Ti:sapphire mode-locked laser (MaiTai Deep See, Spectra Physics,  
517 Santa Clara, CA, USA)<sup>43,44</sup>. OGB1 and SR101 were excited at a wavelength of 920 nm. Emission filters of  
518 525/50nm and 629/56nm were used for the OGB1 and SR101 signals, respectively. The fields of view (FOVs)  
519 were 338  $\times$  338  $\mu\text{m}$  (10 planes from 7 mice) and 507  $\times$  507  $\mu\text{m}$  (14 planes from 7 mice) at 512  $\times$  512 pixels.  
520 The sampling frame rate was at 30Hz using a resonant scanner.

521

#### 522 **Visual stimulation.**

523 Before beginning the recording session, the retinotopic position of the recorded FOV was determined using  
524 moving grating patches (lateral or upper directions, 99.9% contrast, 0.04 cycle/degrees, 2 Hz temporal  
525 frequency, 20 and 50 degrees in diameter) while monitoring the changes in signals over the entire FOV. The  
526 lateral or upper motion directions of the grating were used to activate many cells because the preferred  
527 directions of mouse V1 neurons are slightly biased towards the cardinal directions<sup>44,45</sup>. First, the grating patch  
528 of 50 degrees in diameter was presented in one of 15 (5  $\times$  3) positions that covered the entire monitor to  
529 roughly determine the retinotopic position. Then, the patch of 20 degrees in diameter was presented on the 16  
530 (4  $\times$  4) positions covering an 80  $\times$  80-degree space to finely identify the retinotopic position. The stimulus  
531 position that induced the maximum visual response of the entire FOV was set as the centre of the retinotopic  
532 position of the FOV.

533 A set of circular patches of grey-scaled, contrast-enhanced natural images (200 image types) was used as  
534 the visual stimuli for response prediction and natural image reconstruction (60 degrees in diameter, 512  $\times$  512  
535 pixels, with a circular edge (5 degrees) that was gradually mixed to grey background). Each natural image was

536 adjusted to almost full contrast (99.9%). The mean intensity across pixels in each image was adjusted to an  
537 approximately 50% intensity. Original natural images were obtained from the van Hateren's Natural Image  
538 Dataset (<http://pirsquared.org/research/#van-hateren-database>)<sup>46</sup> and the McGill Calibrated Color Image  
539 Database (<http://tabby.vision.mcgill.ca/html/welcome.html>)<sup>47</sup>. During image presentation, one image type was  
540 consecutively flashed three times (three 200-ms presentations interleaved with 200 ms of grey screen), and the  
541 presentation of the next image was initiated after the presentation of the grey screen for 200 ms. Images were  
542 presented in a pseudo-random sequence in which each image was presented once every 200 image types. Each  
543 image was presented at least 12 times (i.e., 12 trials) in a total recording session. We did not set a long interval  
544 between image flashes to reduce the total recording time and increase the number of repetitions. In this design,  
545 the tail of the Ca<sup>2+</sup> response to one image invaded the time window of the next image presentation (Fig. 1b).  
546 Although this overlap may have affected the visual responses between two adjacent images, many trial  
547 repetitions (> 11 times for each image) in the pseudo-random order and the sparse responses to natural images  
548 (Fig. 1) minimized the effects of response contamination between two consecutive images.

549 Moving, square gratings (8 directions, 0.04 cycle/degrees, 2 Hz temporal frequency, 60-degree patch  
550 diameter) were presented at the same position as the natural image on the screen. Each direction was presented  
551 for 4 secs interleaved by 4 secs of the grey screen. The sequence of directions was pseudo-randomized, and  
552 each direction was presented 10 times in a recording session.

553 All stimuli were presented with PsychoPy<sup>48</sup> on a 32-inch LCD monitor (Samsung, Hwaseong, South  
554 Korea) with a 60-Hz refresh rate, and the timing of the stimulus presentation was synchronized with the timing  
555 of image acquisition using a TTL pulse counter (USB-6501, National Instruments, Austin, TX, USA).

556 The entire recording session for one plane was divided into several recording sessions (4–6  
557 trials/sub-session and 15–25 min for each session). Each recording session was interleaved by approximately  
558 5–10 minutes of rest time during which the slight drift of the FOV was manually corrected. Every two or three  
559 sessions, the retinotopic position of the FOV was checked with the grating patch stimuli during the resting  
560 period. The recording was terminated, and then data were discarded if the retinotopic position was shifted

561 (probably due to eye movement). The recordings were performed in one to three planes of different depths  
562 and/or positions in each animal ( $1.7 \pm 0.8$  planes, mean  $\pm$  standard deviation).

563

#### 564 **Data analysis.**

565 All data analysis procedures were performed using MATLAB (Mathworks, Natick, MA, USA). Recorded  
566 images were phase-corrected and aligned between frames. The averaged image across frames was used to  
567 determine the region of interests (ROIs) of individual cells. After removing slow SF component (obtained with  
568 a Gaussian filter with a sigma of approximately five times the soma diameter), the frame-averaged image was  
569 subjected to a template matching method in which two-dimensional difference of Gaussian (sigma1:  $0.26 \times$   
570 soma diameter that was adjusted for zero-crossing at the soma radius, sigma2: soma diameter) was used as a  
571 template for the cell body. Highly correlated areas between the frame-averaged image and the template were  
572 detected as ROIs for individual cells. ROIs were manually corrected via visual inspection. SR101-positive  
573 cells (putative astrocytes<sup>42</sup>) were removed from the ROI. Time course of calcium signal in each cell was  
574 computed as an average of all pixel's intensities within an ROI. Signal contamination from out of focus plane  
575 was removed by a previously reported method<sup>44, 49</sup>. Briefly, a signal from ring-shaped area surrounding each  
576 ROI was multiplied by a factor (contamination ratio) and subtracted from the signal of each cell. The  
577 contamination ratio was determined to minimize the difference between the signal from a blood vessel and the  
578 surrounding ring shape region multiplied by the contamination ratio. The contamination ratios were computed  
579 for several blood vessels in the FOV, and the mean value for several blood vessels was used for all cells in the  
580 FOV.

581 The average response of 200-ms grey screen period just before each image was subtracted from the  
582 average response of the time course during the last 200 ms of the stimulus period (during 3<sup>rd</sup> flash of each  
583 image at approximately time of the peak  $\text{Ca}^{2+}$  transient) to compute visually evoked responses. The evoked  
584 response was normalized for each cell by dividing by the standard deviation across all visual responses (200  
585 images  $\times$  trials, z-scored response). If the z-scored response to one image was significantly different from 0 (p

586 < 0.01 using signed-rank test across trials) and the across-trial average of the z-scored response was greater  
587 than 1, the response was considered significant for the image. The population sparseness (s) was computed  
588 using the equation described in previous studies<sup>2, 3, 50</sup> as follows:  $s = [1 - (\sum Ri)^2 / (N \sum Ri^2)] / (1 - 1/N)$ , where Ri  
589 is the evoked response of ith cell, and N is the number of cells ( $i = 1-N$ ).

590 Natural images were scaled so that maximum intensity and minimum intensities were 1 and -1,  
591 respectively, and gray intensity was 0. A square position ( $50 \times 50$  degrees) of the centre of natural image patch  
592 was extracted and down-sampled to  $32 \times 32$ -pixel image. The down-sampled image was used to analyze the  
593 Gabor features, response prediction and image reconstruction.

594

#### 595 **Gabor features.**

596 A set of spatially overlapping Gabor filter wavelets was prepared to extract the visual features of the natural  
597 images<sup>10, 51, 52</sup>. The down-sampled images were first subjected to the set of Gabor filters to obtain Gabor  
598 feature values. Single feature value corresponds to a single wavelet filter.

599 Gabor filters have four orientations (0, 45, 90, and 135 degrees), two phases, and 4 sizes ( $8 \times 8$ ,  $16 \times 16$ ,  
600  $32 \times 32$ , and  $64 \times 64$  pixels) located on  $11 \times 11$ ,  $5 \times 5$ ,  $3 \times 3$ , and  $1 \times 1$  grids (Supplementary Fig. 1a and b).  
601 Therefore, the three smaller scale filters were spatially overlapped with each other. The spatial frequencies of  
602 the four scale sizes of the Gabor wavelets were 0.13, 0.067, 0.033, and 0.016 cycle/degrees (cpd). This filter  
603 set was almost self-inverting, i.e., the feature values obtained by applying an image to the wavelet set were  
604 transformed back to the image by summing the filters after multiplying by the feature values<sup>51</sup>. The Gabor  
605 filters and the transformations were based on an open source program (originally written by Drs. Daisuke Kato  
606 and Izumi Ohzawa, Osaka University, Japan,  
607 [https://visiome.neuroinf.jp/modules/xoonips/detail.php?item\\_id=6894](https://visiome.neuroinf.jp/modules/xoonips/detail.php?item_id=6894)).

608

#### 609 **Encoding model.**

610 In the encoding model for response prediction, single-cell responses were predicted using a linear regression



611 analysis of selected Gabor feature values (Fig. 2a and Supplementary Fig. 1a–e). The encoding model was  
612 created independently for each cell. First, Pearson’s correlation coefficients between the response and each  
613 feature value were computed. Then, using one of the preset values for the correlation coefficient as a threshold  
614 (12 points ranging from 0.05 to 0.35, Supplementary Fig.1c–e), only the more strongly correlated features  
615 were selected (feature selection) and used in the regression analysis. The weight and bias parameters of the  
616 regression were estimated by Bayesian linear regression with an expectation-maximization algorithm which is  
617 almost equivalent to linear regression with L2 regularization<sup>53</sup>. After the regression analysis, the non-linearity  
618 of predicted response was adjusted via a rectification step using the following equation<sup>34</sup>, predicted response =  
619  $A/[1 + \exp(\alpha x + \beta)]$ , where  $x$  is the output of the regression and  $A$ ,  $\alpha$ , and  $\beta$  are parameters to be estimated.  
620 This step only scaled the regression output without changing the regression parameters (i.e., weights and  
621 biases). The response prediction of the model was estimated by 10-fold cross validations (CVs) in which the  
622 response data for 180 images were used to estimate the parameters, and the remaining data for 20 images were  
623 used to evaluate the prediction. In the 10-fold CVs, all images were used once as test data. The prediction  
624 performances were estimated using Pearson’s correlation coefficients between the observed (trial-average) and  
625 predicted responses. Encoding models were created for all preset threshold values for feature selection, and the  
626 model that exhibited the best prediction performance was selected as the final model. In the analysis of  
627 weights (i.e., feature) overlap between the two cells, the percentage of overlapping weights relative to the  
628 number of non-zero weights was computed for each cell and averaged between the two cells in the pair.

629 Using the same dataset as used in the encoding model, The RF structure was estimated for each cell using  
630 a regularized inverse method<sup>32-34</sup>. The regularized inverse method uses one hyper-parameter (regularized  
631 parameter). In the 10-fold CVs, the RF structure was estimated with the training dataset using one of preset  
632 regularized parameters (13 logarithmically spaced points between  $10^{-3}$  and  $10^3$ ). The visual response was  
633 predicted using the estimated RF and test dataset. The Prediction performance of visual response was  
634 estimated by determining Pearson’s correlation coefficients between the observed and the predicted responses.  
635 RFs were estimated for all values of the pre-set regularized parameters, and the value that resulted in the best

636 response prediction was selected for the final RF model.

637

### 638 **Image reconstruction.**

639 In the image reconstruction, each Gabor feature value was linearly regressed by the single-trial activities of  
640 multiple cells. In the 10 CVs, the weights and a bias parameter were estimated using the same algorithm as in  
641 the encoding model with the training dataset (see above), and each Gabor feature value was reconstructed from  
642 the visual response in the test dataset. After each Gabor feature was independently reconstructed, sets of  
643 reconstructed feature values were transformed into images as described above (**Gabor features** section, also  
644 see Fig. 3a). Reconstruction performance was evaluated by determining pixel-to-pixel Pearson's correlation  
645 coefficient between the stimulus and reconstructed images. In the cell-selection model (Fig. 3), each feature  
646 value was reconstructed with the subset of cells that were selected using the encoding model (Fig. 2f and  
647 Supplementary fig. 3a), and almost all cells were used across features (Fig. 2j). In the encoding model, each  
648 cell was represented by a subset of features that affected the cell's response. Thus, in the cell-selection model,  
649 each feature was only reconstructed by the cells that encoded information about the reconstructed feature  
650 (Supplementary Fig. 3a).

651 In the analysis of the weights (i.e., feature) overlap between cells, the percentage of overlapping weights  
652 relative to the number of non-zero weights was computed for each cell and averaged between the two cells in  
653 the pair.

654 In the analyses shown in Fig. 4a–d and Fig. 5a–b, cells were separated into responsive and  
655 non-responsive cells in each image and sorted by their response amplitude in descending order (i.e., from  
656 highest to lowest response amplitude). Then the cells were added (in Fig. 4) or dropped (in Fig. 5) one by one  
657 first from the responsive cells and then from non-responsive cells.

658 In the analysis of robustness (Fig. 5c–f), first, z-scored reverse filter was computed in each neuron. A  
659 cluster of pixels whose absolute z-scores were more than 1.5 were defined as a representation area after  
660 smoothing their contours (e.g., red contours in Fig. 5c and Supplementary Fig. 4). If multiple areas were

661 obtained, the largest one was used. In each stimulus image, one responsive neuron was selected as a reference  
662 cell, and correlation coefficients of binarized representation areas were computed between the reference cell  
663 and other responsive cells to an image. Cells whose correlation coefficients were more than 0.4 were selected.  
664 A set of neurons including both the reference and the selected cells were called “overlapping cells”. To  
665 evaluate the effects of cell drop, cells were randomly removed from the overlapping cells, and reconstructed  
666 image was computed after each cell-drop. The reference cell was removed at first, and then other remaining  
667 overlapping cells were removed in each cell-drop sequence. The changes of reconstructed images were  
668 estimated by quantifying pixel values of a local part of the image. The local part of the image was determined  
669 as the reference cell’s representation area overlapped by at least one remaining overlapping cell (overlapping  
670 area in Fig. 5d and supplementary fig. 4). Absolute pixel values were averaged inside the local part of the  
671 image (Note that stimulus images were scaled from -1 to 1. See the section of **Data analysis**) and used for the  
672 evaluation of the local part of reconstructed image. Random drops of overlapping cells were repeated for 120  
673 times, and the results were averaged across the random orders in each reference cell. All responsive cells were  
674 used once as the reference cell in each stimulus image. Data including at least 10 responsive cells and 5  
675 overlapping cells were only used in this analysis.

676 In the cluster analysis (Fig. 7), the overlapping cells selected as described above were clustered by k  
677 means analysis with noise correlation of responses to an image for distance measure (predetermined number of  
678 clusters,  $k = 2, 3, 4,$  and  $5$  were used). We used the number of cluster ( $k$ ) which showed the minimal  
679 between-cluster noise correlation in each overlapping neuron set (Supplementary Fig. 5a). In the analysis of  
680 correlation of trial-to-trial variability of reconstructed image between clusters (Fig. 7d and Supplementary Fig.  
681 5e, i), trial-to-trial variability of the reconstructed image was evaluated by pixel values of the local part of the  
682 image as the analysis in Fig. 5e and f, and correlation coefficient of the pixel value change was computed  
683 between clusters. The local part of the reconstructed image was determined as described above. In the analysis  
684 of reliability of reconstructed image across trials (Supplementary Fig. 5f), correlations between single-trial  
685 reconstructed image and trial-averaged reconstructed image were computed and averaged across trials. The

686 main results were independent of the choice of cluster number (Supplementary Fig. 5g–i). Data including at  
687 least 10 responsive neurons and 5 overlapping neurons were only used in this analysis.

688 The feature values of each image were linearly regressed with the weights of image reconstruction model  
689 (cell-selection model) in all responsive cells in a local population to examine whether all the features of natural  
690 images were represented by the features of the responsive cells (Fig. 8d–f). The fitting error rate (% error) was  
691 computed in each image using a following equation,  $\% \text{ error} = \frac{\sum(F_{\text{fitted}} - F_{\text{image}})^2}{\sum(F_{\text{image}} - F_{\text{mean}})^2} \times 100$ , where  
692  $F_{\text{fitted}}$  is the set of fitted features,  $F_{\text{image}}$  is the set of features of the natural image, and  $F_{\text{mean}}$  is the mean of  
693  $F_{\text{image}}$ .

694

#### 695 **Statistical analyses.**

696 All data are presented as the median and 25–75<sup>th</sup> percentiles unless indicated otherwise. The significant level  
697 was set to 0.05, with the exception of the criteria of significant visual response (0.01). When more than two  
698 groups were compared, the significant level was adjusted with the Bonferroni correction. Two-sided test was  
699 used in all analyses. The experiments were not performed in a blind manner. The sample sizes were not  
700 predetermined by any statistical methods, but are comparable to the sample size of other reports in the field.

701

#### 702 **Data availability.**

703 The datasets of the current study and the code used to analyze them are available from the corresponding  
704 authors on reasonable request.

705

706

#### 707 **Legends**

#### 708 **Figure 1. Sparse visual response to a natural image in mouse V1**

709 **a.** Experimental schema. Natural image flashes were presented as visual stimuli, and the neuronal activities of  
710 single cells in the mouse V1 were recorded using two-photon  $\text{Ca}^{2+}$  imaging.

711 **b.** Trial-averaged time courses of visual responses to 10 natural images (image# 21–30 in a row) in 10  
712 representative cells (cells# 1–10 in a column). Three lines for each response indicate the mean and the mean  $\pm$   
713 the standard error across trials. Black: significant responses, grey: non-significant response, red line: stimulus  
714 periods during which each image type was flashed for three times.

715 **c.** Plots of significant responses of all cells in a representative plane ( $n = 726$  cells, upper left panel).  
716 Responses shaded by the red line in the upper left panel correspond to responses presented in (b). Percentage  
717 of responsive cells for each image (bottom) and percentage of images to which each cell responded (right) are  
718 shown as line graphs. Red lines (bottom and right) indicate median values. Cell numbers (cell #) were sorted  
719 by the percentage of images to which they responded, and image numbers (image #) were sorted by the  
720 percentages of cells that responded to each image in descending order. Single images activated relatively fewer  
721 neurons (bottom).

722 **d.** Examples of population response patterns to three images. (Left) Natural image stimuli and the spatial  
723 distributions of responsive cells in an imaging area (side length: 507 microns). The red filled and grey open  
724 circles indicate the highly responsive and remaining cells, respectively. (Right) Histograms of the visual  
725 responses of neurons in a local population. In the top panel, cells are divided into responsive (red bars) and the  
726 remaining groups (black bars) and are sorted by the response amplitude of each group to the natural image  
727 presented in the upper left panel (descending order). Visual responses to other images are plotted in the middle  
728 and bottom panels. The cell # order was fixed among the three histograms. Only small numbers of responsive  
729 neurons are duplicated among the three images.

730 **e.** Distribution of the amplitude of responses to single images. The cell # is sorted by the amplitude of the  
731 response to each image and averaged across images in a plane. After normalizing cell# (x-axis), data were  
732 collected across planes ( $n = 24$  planes). The median (thick line) and 25–75<sup>th</sup> percentiles (thin lines) are shown.  
733 Small percentages of neurons exhibited higher response amplitudes.

734 **f and g.** Response rate to natural images. The percentages of cells responding to a single natural image (f) and  
735 to at least one image (g). Small percentage of cells responded to single natural image, whereas almost all cells

736 responded to at least one of images.

737 **h** and **i**. Response rate to moving gratings. Percentages of cells that responded to one direction (**h**) and to at  
738 least one direction (**i**) of moving grating.

739 **j**. Percentages of overlapping responsive cells between the natural images. Only a small percentage of cells  
740 exhibited overlapping significant responses between images, indicating that the cells responding to each image  
741 were distributed in a population.

742 **k**. Population sparseness.

743 **f–k**. Each dot indicates data from one plane, and the medians of 24 planes are shown as bars

744

745 **Figure 2. Small overlap in the encoded visual features among cells in a local population**

746 **a**. Scheme of encoding model for a single cell's visual response. The visual response is represented by  
747 weighted sum of the selected Gabor feature values obtained from a set of Gabor filters. The predicted visual  
748 response to  $i$ th image ( $R_i$ ) is represented by the following equation,  $R_i = f(\sum W_j \times F_{ji})$ , where  $f$  is non-linear  
749 scaling function,  $W_j$  is the weight for  $j$ th Gabor feature, and  $F_{ji}$  is the feature value for the  $j$ th Gabor filter ( $G_j$ )  
750 obtained from  $i$ th image ( $S_i$ ). Gabor feature was selected based on the correlation between its feature values  
751 and visual response (Feature selection, see Methods).

752 **b**. and **c**. Examples of response predictions for two neurons. (Left panels) Blue and red lines indicate the  
753 observed and predicted responses, respectively. (Right panels) Weight parameters of the example neurons  
754 presented in the left panels. The weights of one of 10 models (each model corresponds to one of the 10-fold  
755 cross validations) are shown. The number of non-zero weights (i.e., number of used feature) is shown above  
756 the panels. Encoding filters (weighted sums of Gabor filters) are shown in the insets (red and blue indicate  
757 positive and negative values, respectively).

758 **d**. Comparison of response predicted by only the linear step (regression of Gabor feature values without  
759 non-linear (NL) scaling) and the observed response in the example neuron shown in Fig. 2c. Each dot indicates  
760 a response to one image. The red curve indicates NL scaling function curve (see Methods). The NL step

761 resulted in an enhancement of the sparse visual responses. The black line indicates  $y = x$  line.

762 **e.** NL scaling function curves across planes. Each grey curve was obtained by averaging the NL scaling curves  
763 across cells in each plane. Red curve indicates the averaged curve across planes ( $n = 24$  planes). The black line  
764 indicates  $y = x$  line.

765 **f.** Upper left panel: raster plot of the weights in the plane illustrated in Fig. 1c (red: positive weight, blue:  
766 negative weight). The median values for the models of the 10-fold CVs are shown. Right panel: Percentage of  
767 features used for each cell. Bottom panel: Percentage of cells in which each feature was involved in the  
768 response prediction. The coloured bar under the x-axis indicates spatial frequency of the Gabor filter  
769 corresponding to each feature. Red lines in the bottom and right panels indicate median values. Only half of  
770 the Gabor features (624/1248 which have one of two phase sets) are shown for visibility, but the remaining  
771 features were included in the data shown in the right panel.

772 **g.** Participation rate of each feature in the response predictions for a population. Features were divided in terms  
773 of spatial frequency (SF) and averaged in each SF. Mean  $\pm$  standard errors across all planes ( $n = 24$  planes) are  
774 shown.

775 **h.** Distribution of percentages of features used in each cell ( $n = 12755$  cells across 24 planes).

776 **i.** Distribution of percentages of features that overlapped between cells ( $n = 3993653$  cell pairs across 24  
777 planes).

778 **j.** Percentage of features used in at least one cell's response prediction.

779

### 780 **Figure 3. Image reconstruction based on population activity**

781 **a.** Scheme of image reconstruction model. Each Gabor feature value ( $F_{ji}$ ,  $i$ : image #,  $j$ : Gabor feature #) was  
782 independently linearly regressed (weights:  $H_{jn}$ ,  $n$ : cell #) by multiple cell responses ( $R_{ni}$ ) to  $i$ th image ( $S_i$ ) ( $F_{ji} =$   
783  $\sum(H_{jn} \times R_{ni})$ ). Then, a set of reconstructed features ( $F_{1i}, F_{2i}, \dots, F_{ji}$ ) are transformed into an image ( $S'_i$ ). In the  
784 all-cells model, each feature value was reconstructed with all cells. In the cell-selection model, only cells that  
785 were selected by the encoding model were used to reconstruct each feature value (Cell selection, see Methods).

786 Thus, each feature value was reconstructed from different subsets of cells. The flow of the reconstruction  
787 model is represented by black arrows from the bottom to top.

788 **b.** Representative reconstructed images. Stimulus images (Stim. Image), images that were reconstructed using  
789 the all-cells (All-cells) and using the cell-selection model (Cell-selection) are shown. Each reconstructed  
790 image is trial-averaged. The reconstruction performance (pixel-to-pixel Pearson's correlation coefficients  
791 between the stimulus and reconstructed images,  $R$ ) was computed in each trial and then averaged. The  
792 trial-averaged  $R$  is presented above each reconstructed image.

793 **c.** Distributions of  $R$ s of the all-cell model (upper panel) and cell-selection model (bottom panel) in the  
794 representative plane shown in Figs. 1 and 2 ( $n = 200$  images reconstructed using 726 cells from a plane).

795 **d.**  $R$  across planes. \*:  $p = 4.0 \times 10^{-4}$  using the signed-rank test ( $n = 24$  planes). Reconstruction performance of  
796 the cell-selection model was comparable with that of the all-cells model.

797

798 **Figure 4. Sparse responsive neurons sufficiently represent visual contents of single natural images.**

799 **a-c.** Examples of images reconstructed from only the highly responsive cells (top panels), and reconstruction  
800 performances ( $R$ ) plotted against the number of cells used for the reconstructions (bottom panels). In this  
801 analysis, using the parameters of cell-selection model, the number of cells used to reconstruct each image  
802 increased one by one. The cells were first collected from the responsive cells and then from the remaining cells.  
803 (Top panels), Stimulus image (1<sup>st</sup> panel) and reconstructed images (trial-average) from a subset of cells  
804 (2<sup>nd</sup>-4<sup>th</sup> panels).  $R$  and the number of cells used for the reconstruction are shown under the panel. (Bottom  
805 panels), Responsive cells (red dots) and the remaining cells (black dots) were separately sorted by response  
806 amplitude (descending order), and cells were added one by one from responsive cells with higher response  
807 amplitude to the remaining cells with lower response amplitude. The horizontal lines indicate 95% peak  
808 performances, and the numbers of cells for which the performance curves crossed the 95% level are indicated  
809 by the vertical lines. In each case, the responsive cells alone were sufficient to reconstruct the image nearly as  
810 well as all cells.



811 **d.** Averaged performance curve ( $n = 24$  planes) plotted against cell number. The thick black line and grey lines  
812 indicate the means and the means  $\pm$  standard errors, respectively. The horizontal line indicates the 95 % peak  
813 performance, and the vertical line indicates the first crossing point of the performance curve on the 95% line.

814 **e.** Contributions of the top 18 responsive cells to the image reconstruction shown in (a). (Top panels) Reverse  
815 filters (weighted sum of Gabor filters) multiplied by the visual responses reveal the spatial patterns of  
816 individual cell's contributions to the reconstructed image. The patterns vary among cells. (Bottom panels)  
817 Reconstructed image gradually changes by consecutively adding single cells.

818 **f.** Distributions of R for all cells (top, same as bottom of Fig. 3c) and the highly responsive cells (bottom) in  
819 the representative plane (726 cells).  $N = 200$  images. Red vertical lines indicate medians.

820 **g.** R for all cells and only the responsive cells. \*:  $P = 4.0 \times 10^{-4}$  by signed- rank test ( $n = 24$  planes). Each dot  
821 indicates data for each plane, and bars indicate median. The Rs were comparable between the two models.

822 **h–j.** Overlapping weights (i.e., features) between the cells highly responding to the same image.

823 **h,** Schema of the analysis.

824 **i,** Distribution of percentage of overlapping features in all cell pairs responding to the same image collected  
825 across planes.

826 **j.** The median of the percentages of overlapping features in the cell pairs responding to the same image. Each  
827 dot indicates the median in each plane ( $n = 24$  planes) and the bar indicates median across planes. The  
828 percentages of overlapping features were still low even in the cell pairs responding to the same image.

829

### 830 **Figure 5. Robust image representation by small numbers of responsive neurons**

831 **a.** Examples of reconstructed images after single cell drop. Top: Stimulus and reconstructed image from all  
832 responsive neurons (57 cells). Middle: Reconstructed images after the single cell drop. Bottom: Reconstructed  
833 images from the dropped cells. Cell # is the same as in Fig. 4e.

834 **b.** Reduction of reconstruction performance after removing a single cell. Cell # on X axis were ordered from  
835 largest to smallest response amplitudes. Cell # was the same order as Fig. 4d. The median (horizontal line

836 inside a box), 25–75<sup>th</sup> percentiles (box), and 5–95<sup>th</sup> percentiles (whiskers) were obtained across planes (n = 24  
837 planes).

838 **c.** Top: Reverse filters of overlapping cells (top panels). Representation area of each neuron was contoured by  
839 red line. Middle: Reconstructed images by the nine cells. Bottoms: Reconstructed images by single cells  
840 (upper panels) and reconstructed images after single cell drop (lower panels). Single cell drop had only small  
841 effect on the reconstructed images.

842 **d.** Examples of reconstructed images during sequential drop of the nine overlapping neurons. Red contours  
843 indicate overlapping area of the nine cells. Image around the overlapping areas gradually degraded after each  
844 cell drop.

845 **e** and **f.** Pixel value in a local part of reconstructed image (overlapping area) against number (or percentage) of  
846 dropped cells for the representative case shown in Fig. 5c (e) and for summary of all data (f). The intensity  
847 was obtained by averaging absolute pixel values within a local part of the image after each cell drop and  
848 compared to that from all overlapping cells. In each case, the reference cell was dropped at first, then cells  
849 were randomly selected and dropped from the remaining overlapping cells sequentially. In each stimulus, all  
850 responsive cells were used once as the reference cell. Data were collected and averaged across cells and across  
851 stimulus in each plane, and then collected across planes. Middle, lower and upper lines of a box, and whiskers  
852 indicate median, 25–75<sup>th</sup> and 5–95<sup>th</sup> percentiles across repetitions of random drop (n = 120 repetitions, e) or  
853 across planes (n = 24 planes, f), respectively.

854

### 855 **Figure 6. Representation by multiple neurons is more reliable than that by single neuron**

856 **a.** Trial-to-trial variability of the representative reconstructed image. Images were reconstructed by single-trial  
857 responses of all responsive neurons (57 cells) to the image (Stim. upper left).

858 **b.** Trial-to-trial variability of visual responses to the representative stimulus image. The nine neurons are the  
859 same as in Fig. 5c.

860 **c.** Trial-to-trial variability of reconstructed images by single neurons. Cell 1 is a reference cell in these

861 overlapping cells. Each image was reconstructed by a single trial response of a single cell. The images were  
862 variable across trials in many cells.

863 **d.** Trial-to-trial variability of reconstructed images by the nine cells (top) and their activity patterns in FOV  
864 (bottom). The reconstructed images were relatively reliable while activity patterns were variable across trials.  
865 (Bottom), One side length of FOV: 507  $\mu\text{m}$ . Color code is same as in **b**.

866

867 **Figure 7. Independent correlated activities between subsets of responsive neurons provide robust**  
868 **representation against trial-to-trial variability**

869 **a.** Noise correlations between the overlapping neurons. These neurons formed three clusters (black squares).  
870 Cell order is same as in Fig. 6. The number of clusters (i.e., three in this case) which showed minimal  
871 between-cluster correlation was used (see Supplementary Fig. 5a).

872 **b.** Distribution of the number of clusters which showed minimal noise correlation between clusters.

873 **c.** Response correlation of within- (red) and between-cluster (blue) neuron pairs for all data (across reference  
874 cells, stimulus and planes). Between-cluster neuron pairs show almost-zero correlations on average, indicating  
875 independent activities between clusters.

876 **d.** Trial-variability of reconstructed images by the three clusters shown in (a). The three clusters represent the  
877 local part of the image in different trials, and integration of clusters provides robustness against trial-to-trial  
878 variability (Fig. 6d, also see Supplementary Fig. 5e, f). Correlation coefficients of trial-variability of the  
879 images were shown on the right side of the panels.

880

881 **Figure 8. Visual features of natural images are distributed among most neurons in a population**

882 **a.** Raster plots of highly responsive cells for each image in the representative plane shown in the previous  
883 figures ( $n = 711/726$  responsive cells). The image # is sorted by the image reconstruction performance  
884 (descending order, right panel). In each line, cells that did not respond to the previously plotted images are  
885 added on the right side. As image # increased, the number of newly added cells decreased, and then, cell #

886 quickly reached a plateau level, indicating that many images are represented by the combination of cells that  
887 responded to other images. Thus, most images could be represented with some degree of accuracy by the  
888 combination of subsets of responsive cells of the population.

889 **b.** The numbers of responsive cells (black line) and numbers of newly added responsive cells (red line) are  
890 plotted against image # for the case shown in (a). Again, the number of newly added cells quickly decreased as  
891 the image # increased.

892 **c.** The numbers of responsive cells (black line) and numbers of newly added responsive cells (red line) are  
893 plotted against image #.  $N = 24$  planes. Three lines in each colour indicate the mean and the mean  $\pm$  the  
894 standard errors.

895 **d.** Schema of the analysis. The feature set of each natural image was linearly regressed by the weights from the  
896 cell-selection model of all the responsive cells in each plane, and the fitting error (% error, see Methods) was  
897 computed in each image. If the features encoded in all the responsive cells were sufficient to represent natural  
898 images, the weights of the responsive cells should work as basis functions to represent visual features of the  
899 natural images.

900 **e.** Distributions of the errors of all images collected across planes.

901 **f.** The median of % error across planes (bar,  $n = 24$  planes). Each dot indicates the median in each plane.

902

### 903 **Supplementary figure legends**

#### 904 **Supplementary Figure 1. Gabor filter set and prediction performance of encoding model**

905 **a.** Scheme of the process used to transform natural image features with Gabor filters. Each natural image was  
906 subjected to Gabor filters to obtain the corresponding Gabor feature values. Conversely, a set of Gabor feature  
907 values were transformed into an image by summing the Gabor filters after multiplying by the corresponding  
908 Gabor feature values.

909 **b.** Scheme of the Gabor filter set. Four orientations, 2 phases, 4 scales (or spatial frequencies) of Gabor filters  
910 were used. The 4 scales of Gabor filters (spatial frequency: 0.016, 0.033, 0.067, and 0.13 cpd) were positioned

911 on a  $1 \times 1$ ,  $3 \times 3$ ,  $5 \times 5$ , and  $11 \times 11$  grids. A total of 1248 filters were used.

912 **c.** Effect of feature selection on the response prediction performance. The response prediction performances  
913 (correlation coefficients between the observed and predicted responses) are plotted against the threshold values  
914 of the feature selection for 30 representative cells. Pearson's correlation coefficient (corr. R) between each  
915 feature values and response was computed, and the features with corr. R greater than the pre-set threshold  
916 values were used for the regression analysis of the encoding model. The threshold value for the final model  
917 was selected from the pre-set values to maximize the response prediction.

918 **d** and **e.** Averaged prediction performance plotted against the feature selection threshold among all cells in the  
919 representative plane shown in the main figures ( $n = 726$  cells from one plane, **d**) and among all planes ( $n = 24$   
920 planes, **e**). As the threshold increased, the prediction performance increased slightly and reached a plateau  
921 level. The threshold was independently adjusted for each cell such that the response prediction was maximized.  
922 Means  $\pm$  standard errors are shown.

923 **f-h.** Results of the response predictions for the representative plane shown in the main figures ( $n = 726$  cells  
924 from one plane). Distributions of the response prediction performances ( $n = 200$  images, **f**), percentages of  
925 features used for each cell ( $n = 726$  cells, **g**), and percentages of overlapping features between cells ( $n =$   
926  $263175$  pairs, **h**). In each cell pair, the number of overlapping features was divided by the number of features  
927 used in the encoding model for each cell and averaged between the two cells in a pair.

928 **i.** Distribution of the response prediction performance of all cells across all planes ( $n = 12755$  cells from 24  
929 planes).

930 **j-l.** Results of the response prediction performance across planes ( $n = 24$  planes). Distributions of the response  
931 prediction performances (**j**), percentages of features used for each cell (**k**), and percentages of overlapping  
932 features between cells (**l**) are shown.

933

934 **Supplementary Figure 2. Relationships between the weights of the encoding model and the RF structure**

935 **a-d.** Relationship between the weights of the Gabor features and the RF structure.

936 **a and b.** (a) Schema of the analysis. In each cell, the RF structure was determined using a pseudo-inverse  
937 method (see Methods), and pixel-to-pixel Pearson's correlation coefficients between the RFs and Gabor filters  
938 were computed ( $R_1$  and  $R_2$  in (a);  $R$  (RF vs. Gabor)). (b) Then, Pearson's correlation coefficient ( $R$ ) between  
939 the  $R$  (RF vs. Gabor) and weight values ( $W_1$  and  $W_2$  in (a)) was computed for each cell. In the example cell  
940 shown in (b), the  $R$  (RF vs. Gabor) and weight values were positively correlated ( $R = 0.83$ ), indicating that  
941 Gabor filters similar to the RF were assigned high weight value.

942 **c and d.** Distributions of  $R$  between  $R$ (RF vs. Gabor) and weights for all cells in the representative plane (c)  
943 and for all planes (d).

944 **e-i.** Relationship between the spatial overlap of the encoding filter and percentage of overlapping features  
945 between cells.

946 **e.** Examples of the response prediction performances of the two representative cells. The black and coloured  
947 lines indicate the observed and predicted responses, respectively.

948 **f.** Weights and encoding filters of the two cells shown in (e). In these cells, the percentage of overlapping  
949 non-zero feature (% overlapping feature) was 12%, and the spatial similarity of the encoding filters  
950 (pixel-to-pixel correlation,  $R$  (filter)) was 0.26. The encoding filter was obtained by computing the sum of  
951 Gabor filters multiplied by the weights of the encoding model. The red and blue colours of the encoding filter  
952 indicate positive and negative values, respectively.

953 **g.** Relationship between the % overlapping feature and absolute value of the  $R$  (filter). These two values were  
954 positively correlated, indicating that the % overlapping feature reflects the spatial similarity of the encoding  
955 filters. All pairs in the representative plane are illustrated by color code.

956 **h.** Diverse structure of the encoding filters. The absolute  $R$  (filter) was relatively small for all pairs (median:  
957 0.05), which indicated the diverse structure of the encoding filters between cells.

958 **i.** Distribution of the correlation coefficient between the % overlapping feature and the absolute value of  $R$   
959 (filter) ( $|R(\text{filter})|$ ,  $N = 24$  planes).

960

961 **Supplementary Figure 3. Image reconstructions based on three models: all-cells, cell-selection**  
962 **(encoding-optimized) and image-optimized models**

963 **a.** Relationship between the encoding model (cyan arrows, Fig. 2 in the main text) and the image  
964 reconstruction model (red arrows, Fig.3 in the main text). In the image reconstruction model, each Gabor  
965 feature value was independently linearly regressed by the visual responses of multiple neurons. In the  
966 “all-cells” model of image reconstruction, each feature value was reconstructed using all cells (not shown in  
967 the figure). In the “cell-selection” model of image reconstruction, each feature was reconstructed using a  
968 subset of cells (thin red arrows) selected by the encoding model (thin cyan arrows).

969 **b–c.** The image reconstruction performances (R) were compared across the three models, i.e., all-cells,  
970 cell-selection (encoding-optimized) and image-optimized model. The performances were almost comparable  
971 between the all-cells and cell-selection models (see the main text). The performance was only slightly  
972 improved when the cell selection for each Gabor feature was performed to maximize the reconstruction of the  
973 feature value (“image optimized” model in Supplementary Fig. 3b and c). In the image-optimized model, cells  
974 were first selected based on the correlation between the cell’s response and the feature value, similar to the  
975 feature selection in the encoding model (see Methods). Then, each feature was linearly regressed only by the  
976 selected cells. Threshold of the correlation coefficient for cell selection was determined such that the  
977 reconstruction performance for each feature value was maximized.

978 **b.** Representative reconstructed images. Top panels: stimulus images; second row panels: reconstructed images  
979 from the all-cells model; third row panels: reconstructed images from the cell-selection model (also called  
980 “encoding-optimized” model hereafter in the legends); fourth row panels: reconstructed images from the  
981 image-optimized models; bottom panels: reconstructed images using overlap of the cells for each feature  
982 (overlap) between the encoding-optimized and image-optimized models. In the overlap model, each feature  
983 value was reconstructed using the cells employed in both the encoding-optimized and image-optimized  
984 models.

985 **c.** Comparison of R. Mean  $\pm$  standard errors ( $n = 24$  planes) are shown. Each dot indicates the average of all

986 images in each plane. The image-optimized model exhibited an only slightly better R than the other models. P  
987  $= 2.4 \times 10^{-3}$  (all-cells vs. encoding-optimized),  $1.1 \times 10^{-4}$  (all-cells vs. image-optimized),  $2.1 \times 10^{-4}$  (all-cells vs.  
988 overlap),  $1.1 \times 10^{-4}$  (encoding-optimized vs. image-optimized),  $1.1 \times 10^{-4}$  (encoding-optimized vs. overlap), and  
989  $1.1 \times 10^{-4}$  (image-optimized vs. overlap), using signed rank test with the Bonferroni correction.

990 **d.** Percentages of cells used for each feature are plotted against the spatial frequencies of Gabor filters. The  
991 image-optimized model (blue) used more cells to reconstruct each feature value than the encoding-optimized  
992 model (i.e., cell-selection model, red). The plot of the encoding-optimized model is the same as the plot shown  
993 in Fig.2g in the main text.

994 **e.** Overlap of the cells between the image-optimized and encoding-optimized models. In the reconstruction of  
995 each feature value, the cells used in the encoding-optimized model were almost included in the cells used in  
996 the image-optimized model. Image-only: percentage of cells used only in the image-optimized model.  
997 Encoding-only: percentage of cells used only in the encoding-optimized model. Overlap: percentage of cells  
998 used in both models. The results in (c–e) indicate that the overlapping cells mainly contributed to the image  
999 reconstruction and the image-only cells contributed to the slight increase in R of the image-optimized model.

1000 **f–h.** Comparison of reverse filters among the overlap, image-only and encoding-only cells.

1001 **f.** Examples of reverse filters (reconstruction filters, i.e., the sums of Gabor filters multiplied by the weights in  
1002 each cell) in the overlap cells (upper panels), image-only cells (middle), and encoding-only cells (lower) used  
1003 to reconstruct the feature whose Gabor filter is shown in the left panel (reconstruction target). The centre  
1004 panels present reverse filters of single cells, and the right-most column presents averaged reverse filters among  
1005 the cells. The reverse filters of the overlap cells appear to be similar to the Gabor filter of the reconstructed  
1006 feature. In the image-only cells, the reverse filters of the individual cells do not appear to be similar to the  
1007 Gabor filter of reconstructed feature, whereas the average of reverse filters resembles the Gabor filters. This  
1008 suggests that the overlapping cells represent the reconstructed feature at the single-cell level, whereas the  
1009 image-only cells represent the feature as a population.

1010 **g.** Correlation between the reverse filters of single cells and the Gabor filters of the reconstructed feature. At



1011 the single-cell level, the reverse filters of the overlapping cells (black line) are more similar to the Gabor filters  
1012 of reconstructed features than the reverse filters of the image-only and encoding-only cells. The similarity of  
1013 the reverse filter to the Gabor filter of reconstructed feature was indistinguishable between the image-only and  
1014 encoding-only cells (red and blue lines). Mean  $\pm$  s.e. are shown.  $P = 1, 1, 0.087$  and  $0.080$  ( $0.016$ – $0.13$  cpd) for  
1015 encoding-only vs. image-only;  $2.4 \times 10^{-3}$ ,  $2.2 \times 10^{-4}$ ,  $2.2 \times 10^{-4}$ , and  $2.2 \times 10^{-4}$  for encoding-only vs. overlap;  
1016  $2.2 \times 10^{-4}$ ,  $2.2 \times 10^{-4}$ ,  $2.2 \times 10^{-4}$ , and  $2.2 \times 10^{-4}$  for image-only vs. overlap; using signed rank test with the  
1017 Bonferroni correction.

1018 **h.** Correlation between the averaged reverse filters and Gabor filters of the reconstructed feature. As a  
1019 population, the similarities of the average reverse filters of the image-only cells (blue) to the Gabor filters are  
1020 slightly less than the similarity of the overlapping cells (black) but greater than the encoding-only cells (red).  
1021 Based on these results, the image-only cells were responsible for the slight increase in R by representing the  
1022 reconstructed feature as a population. Mean  $\pm$  s.e. are shown.  $P = 2.4 \times 10^{-3}$ ,  $2.2 \times 10^{-4}$ ,  $2.5 \times 10^{-4}$ , and  $2.5 \times 10^{-4}$   
1023 ( $0.016$ – $0.13$  cpd) for encoding-only vs. image-only;  $2.4 \times 10^{-3}$ ,  $2.2 \times 10^{-4}$ ,  $2.2 \times 10^{-4}$ , and  $2.2 \times 10^{-4}$  for  
1024 encoding-only vs. overlap;  $4.1 \times 10^{-4}$ ,  $2.2 \times 10^{-4}$ ,  $2.2 \times 10^{-4}$ , and  $2.5 \times 10^{-4}$  for image-only vs. overlap; using  
1025 signed rank test with the Bonferroni correction.

1026 In summary, the cells used in both the encoding- and image-optimized models (i.e., overlapping cells)  
1027 likely represented the reconstructed feature at the single-cell level, whereas the additional cells that were used  
1028 only in the image-optimized model (i.e., image-only cells) probably represented the reconstructed feature as a  
1029 population. Thus, the main information about visual contents was obtained from the encoding-optimized  
1030 model (i.e., cell-selection model), and additional information was extracted when more cells that were not  
1031 captured by the cell-selection using encoding model were integrated into the reconstruction model.

1032

#### 1033 **Supplementary Figure 4. Spatial overlap of reverse filters among responsive neurons**

1034 **a.** Spatial overlap of reverse filters. Reverse filter was transformed to z-score, and area in which absolute  
1035 z-score was greater than 1.5 was defined as a significant area (red contours in left panels). The significant area

1036 was transformed to a binary image, and a pixel-to-pixel correlation coefficient of the binary image was  
1037 computed between two cells. Cell pair whose correlation coefficient was greater than 0.4 was defined as  
1038 spatially overlapping cell pair.

1039 **b.** Distribution of the number of spatially overlapping cells.

1040

1041 **Supplementary Figure 5. Independent activities between subsets of responsive neurons provide robust**  
1042 **representation against trial-to-trial response variability.**

1043 **a.** Noise correlations in between-cluster cell pairs in the representative neuron set (reference and overlapping  
1044 cells) shown in Fig. 5c, 6b, 6c and 7a. Cluster number which showed minimal noise correlation between  
1045 clusters was used in the analyses of main figures.

1046 **b.** Correlation of reverse filters between cells in within- (red) and between-cluster pairs (blue). Distributions  
1047 highly overlapped between the two pairs, although median correlation coefficient of the within-cluster pair  
1048 was higher than those of the between-cluster pair (0.23[0.05–0.43], n=620990 in within-cluster pairs, and  
1049 0.19[0.02–0.39], n=809833, in between-cluster pairs,  $p < 1.0 \times 10^{-9}$  by signed rank test).

1050 **c.** Comparisons of reconstructed images by the clusters shown in Fig 7a. Similarity of reconstructed images  
1051 between clusters was estimated by pixel-to-pixel Pearson's correlation coefficient. Trial-averaged images are  
1052 shown.

1053 **d.** Distribution of reconstructed image correlation between clusters. Positive correlation of the distribution  
1054 indicates that clusters represent similar image patterns. Median [25–75<sup>th</sup>]: 0.33 [0.11–0.52], n=57420 cluster  
1055 pairs.

1056 **e.** Correlation of across-trial local image intensity change between clusters. The local image intensity was  
1057 obtained by averaging absolute pixel values inside the overlapping area (red contours in Fig. 5d in the main  
1058 figure). As predicted by response correlations (Fig. 7c), the distribution shows almost-zero correlation on  
1059 average (-0.08[-0.24–0.09], n=57420 cluster pairs), indicating independent representations between clusters.

1060 **f.** Across-trial reliability of reconstructed by individual clusters (blue) and all cells in a set of overlapping cells

1061 (red). The reliability was estimated by computing correlation coefficient between single-trial and  
1062 trial-averaged reconstructed images and averaging across trials.  $P = 1.8 \times 10^{-5}$  by signed rank test ( $n = 24$   
1063 planes). Middle, lower and upper lines of a box, and whiskers indicate median, 25–75<sup>th</sup> and 5–95<sup>th</sup> percentiles  
1064 across planes ( $n = 24$  planes).

1065 **g-i.** The main results (Fig. 7 and Supplementary Fig. 5) are independent of the number of clusters. (g) Noise  
1066 correlation of within-cluster pairs and between-cluster pairs (blue), corresponding to Fig. 7c. Almost  
1067 zero-correlation in between-cluster neuron pairs were observed in all the number of clusters. (h) Correlation of  
1068 reconstructed image between clusters corresponding to supplementary fig. 5c and d. Positive correlations were  
1069 observed in all the number of clusters. (i) Correlation of across-trial image intensity change between clusters,  
1070 corresponding to supplementary fig. 5e. Image intensity was computed by averaging absolute pixel values  
1071 inside the overlapping area. Almost zero correlation between clusters were observed in all the number of  
1072 clusters. (g–i) Middle, lower and upper lines of a box, and whiskers indicate median, 25–75<sup>th</sup> and 5–95<sup>th</sup>  
1073 percentiles across all samples. (g)  $n = 739579, 1001691, 1134950, 1218522$  in between-cluster (blue), and  $n =$   
1074  $691244, 429132, 295873, 212301$  in within cluster pairs (red), for cluster number 2, 3, 4, 5 respectively. (h, i)  
1075  $n = 30573, 91719, 183438, 305730$  cluster pairs for cluster number 2, 3, 4, 5, respectively.

1076

1077 **Supplementary Figure 6. Neurons were spatially intermingled between clusters.**

1078 **a–c.** Representation areas of a set of overlapping cells (top) and cell's location in the imaging field (bottom).  
1079 Top. Contours of representation areas are drawn on a stimulus image by colour lines (each colour indicates  
1080 each cluster). Bottom. Grey dots indicate locations of recorded neurons, and coloured lines connect cells in  
1081 one cluster. Different colors indicate different clusters. Three sets of overlapping cells are presented in a–c.

1082 **d–f.** Same as (a–c) except for the stimulus image and reference cells. Scales of figures are same in a–f. Scale  
1083 bar indicates 100 microns.

1084 **g.** Distribution of cell-cell distance of within-cluster pair (red) and between-cluster pair (blue). Distributions  
1085 almost overlap, indicating that cells are spatially intermingled between clusters. Thus, cell portions do not

1086 simply explain the structure of noise correlations. Median [25–75<sup>th</sup> percentiles]: 165 [103–242] microns, n =  
1087 809833 for between-cluster cell pairs and 162 [100–238] microns, n = 620990 for within-cluster cell pairs.

# Yoshida and Ohki, Figure 1

bioRxiv preprint doi: <https://doi.org/10.1101/300863>; this version posted July 30, 2018. The copyright holder for this preprint (which was not certified by peer review) is the author/funder. All rights reserved. No reuse allowed without permission.

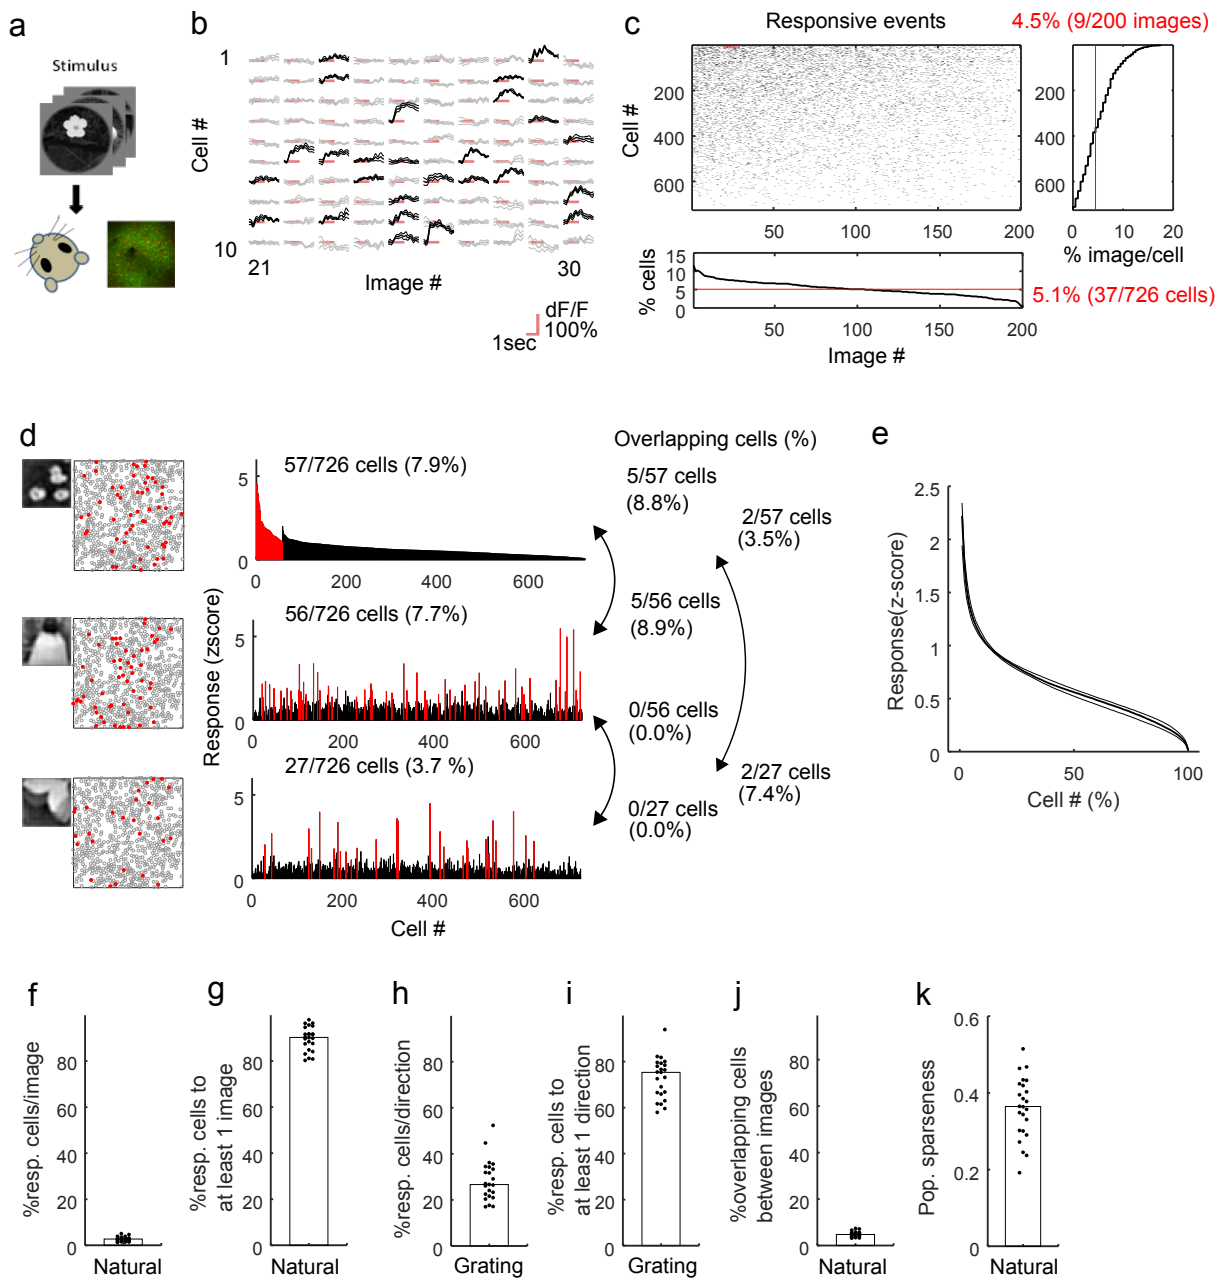

# Yoshida and Ohki, Figure 2

bioRxiv preprint doi: <https://doi.org/10.1101/300863>; this version posted July 30, 2018. The copyright holder for this preprint (which was not certified by peer review) is the author/funder. All rights reserved. No reuse allowed without permission.

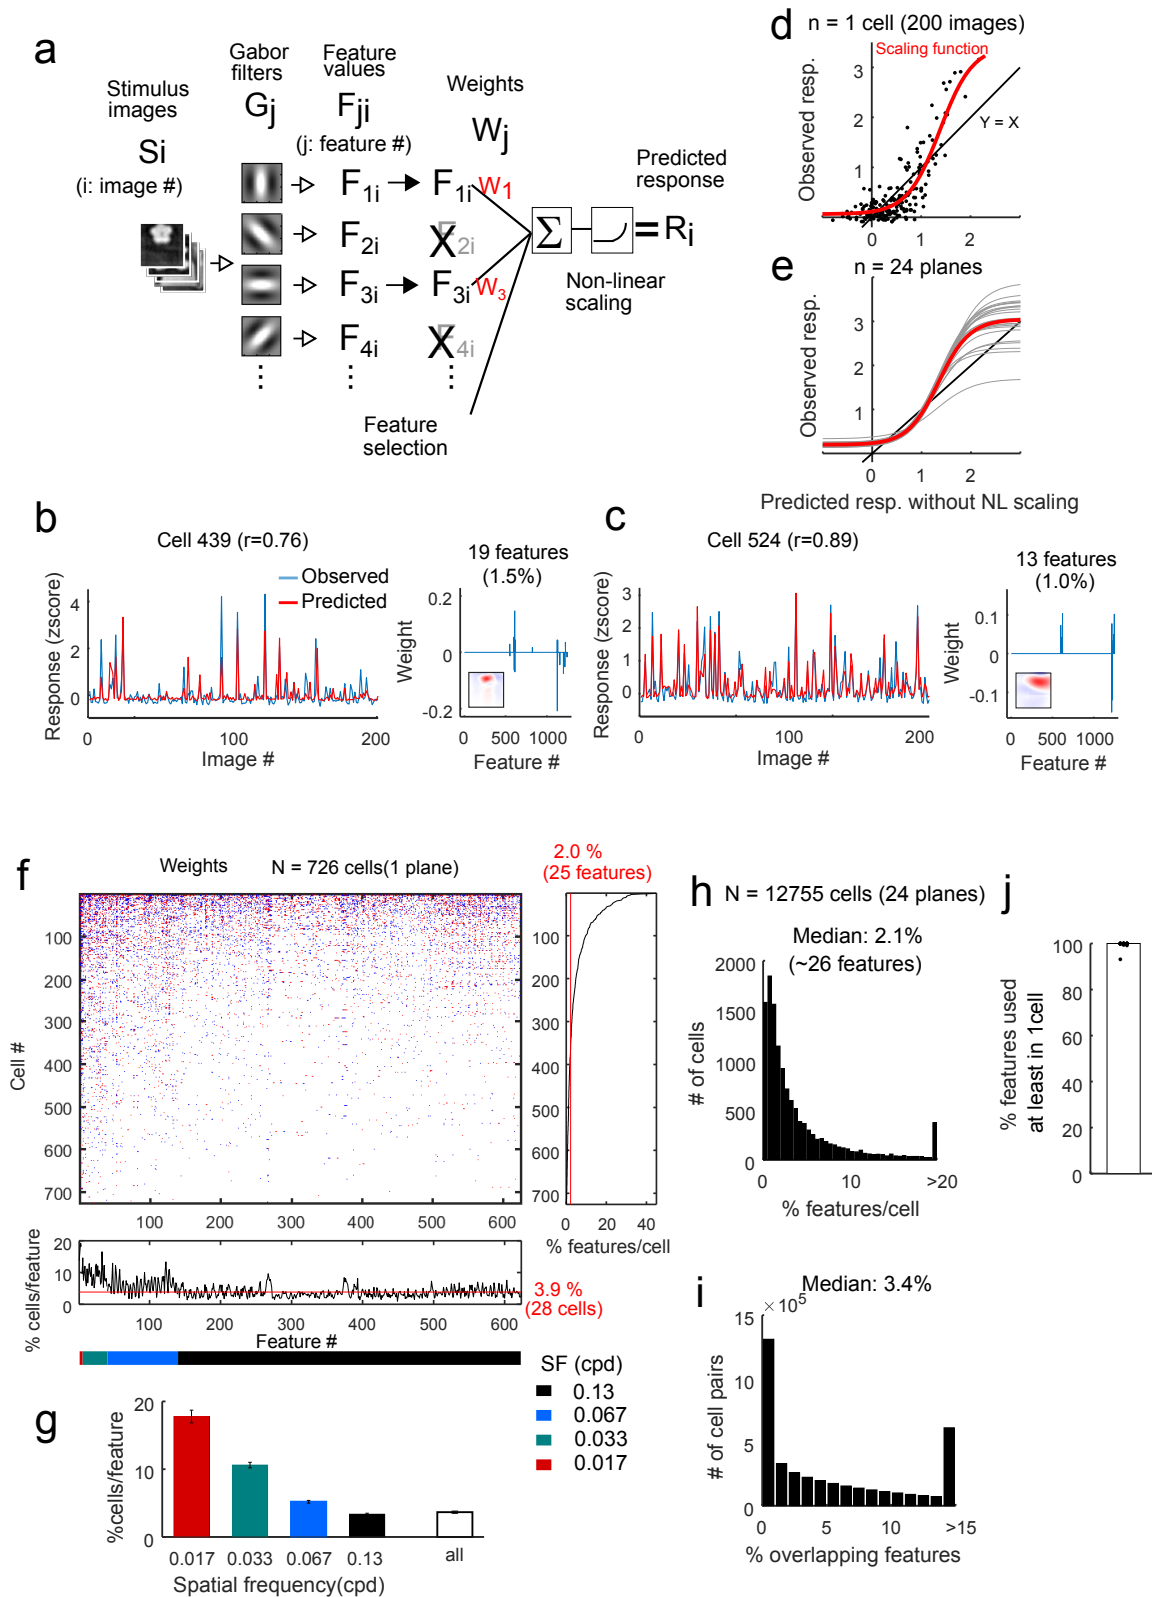

Yoshida and Ohki, Figure 3

bioRxiv preprint doi: <https://doi.org/10.1101/300863>; this version posted July 30, 2018. The copyright holder for this preprint (which was not certified by peer review) is the author/funder. All rights reserved. No reuse allowed without permission.

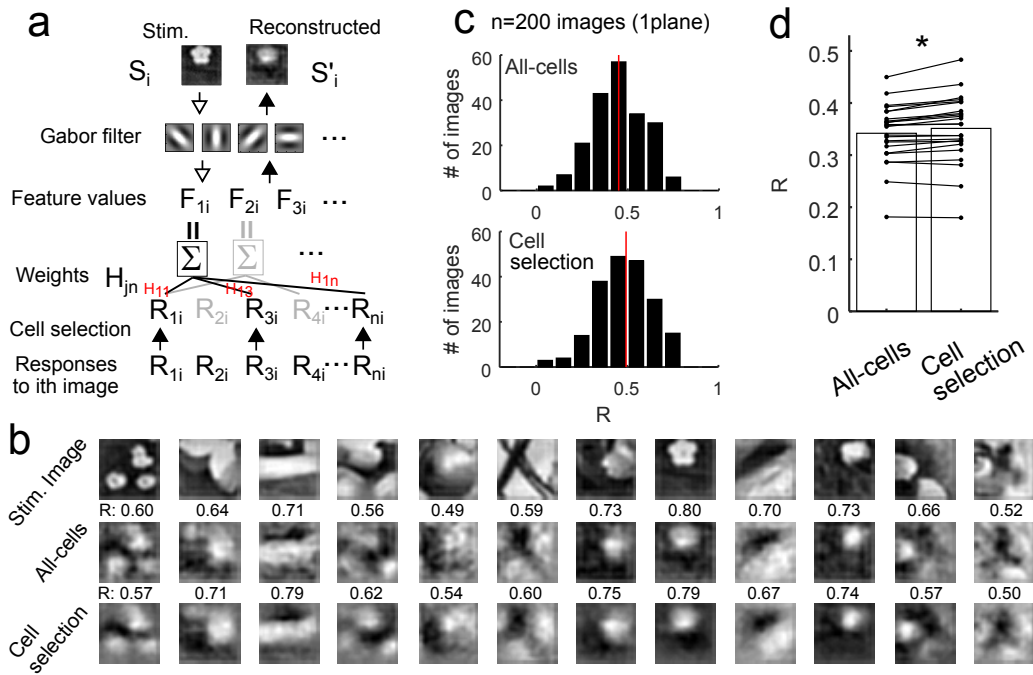

# Yoshida and Ohki, Figure 4

bioRxiv preprint doi: <https://doi.org/10.1101/300863>; this version posted July 30, 2018. The copyright holder for this preprint (which was not certified by peer review) is the author/funder. All rights reserved. No reuse allowed without permission.

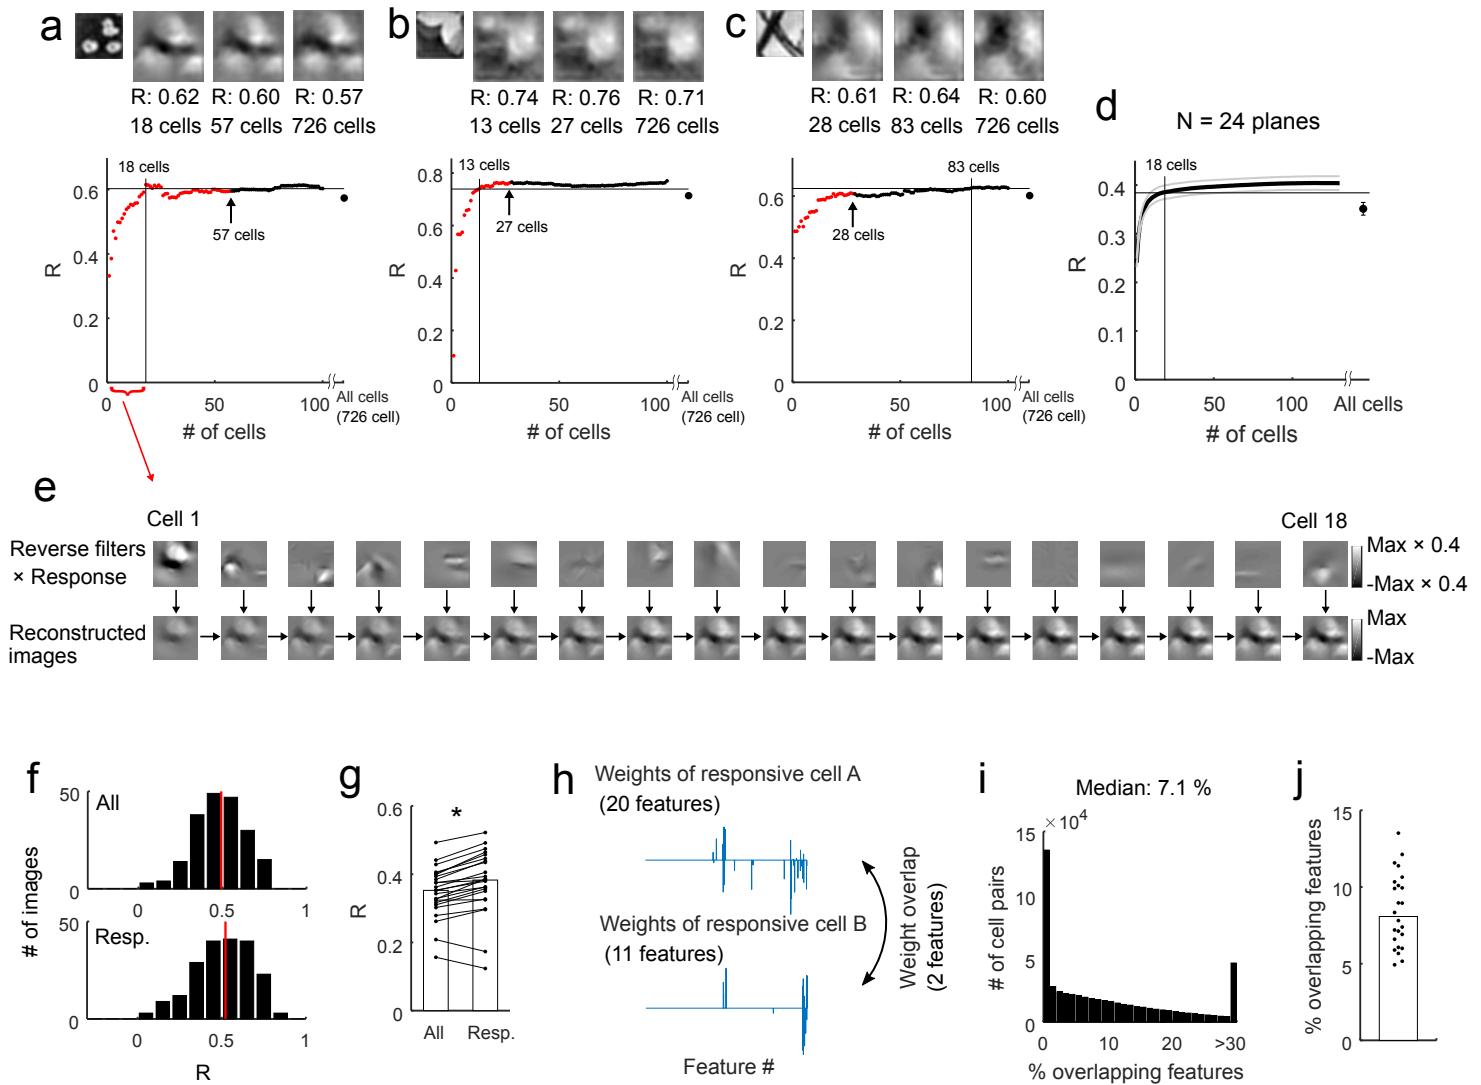



# Yoshida and Ohki, Figure 5

bioRxiv preprint doi: <https://doi.org/10.1101/300863>; this version posted July 30, 2018. The copyright holder for this preprint (which was not certified by peer review) is the author/funder. All rights reserved. No reuse allowed without permission.

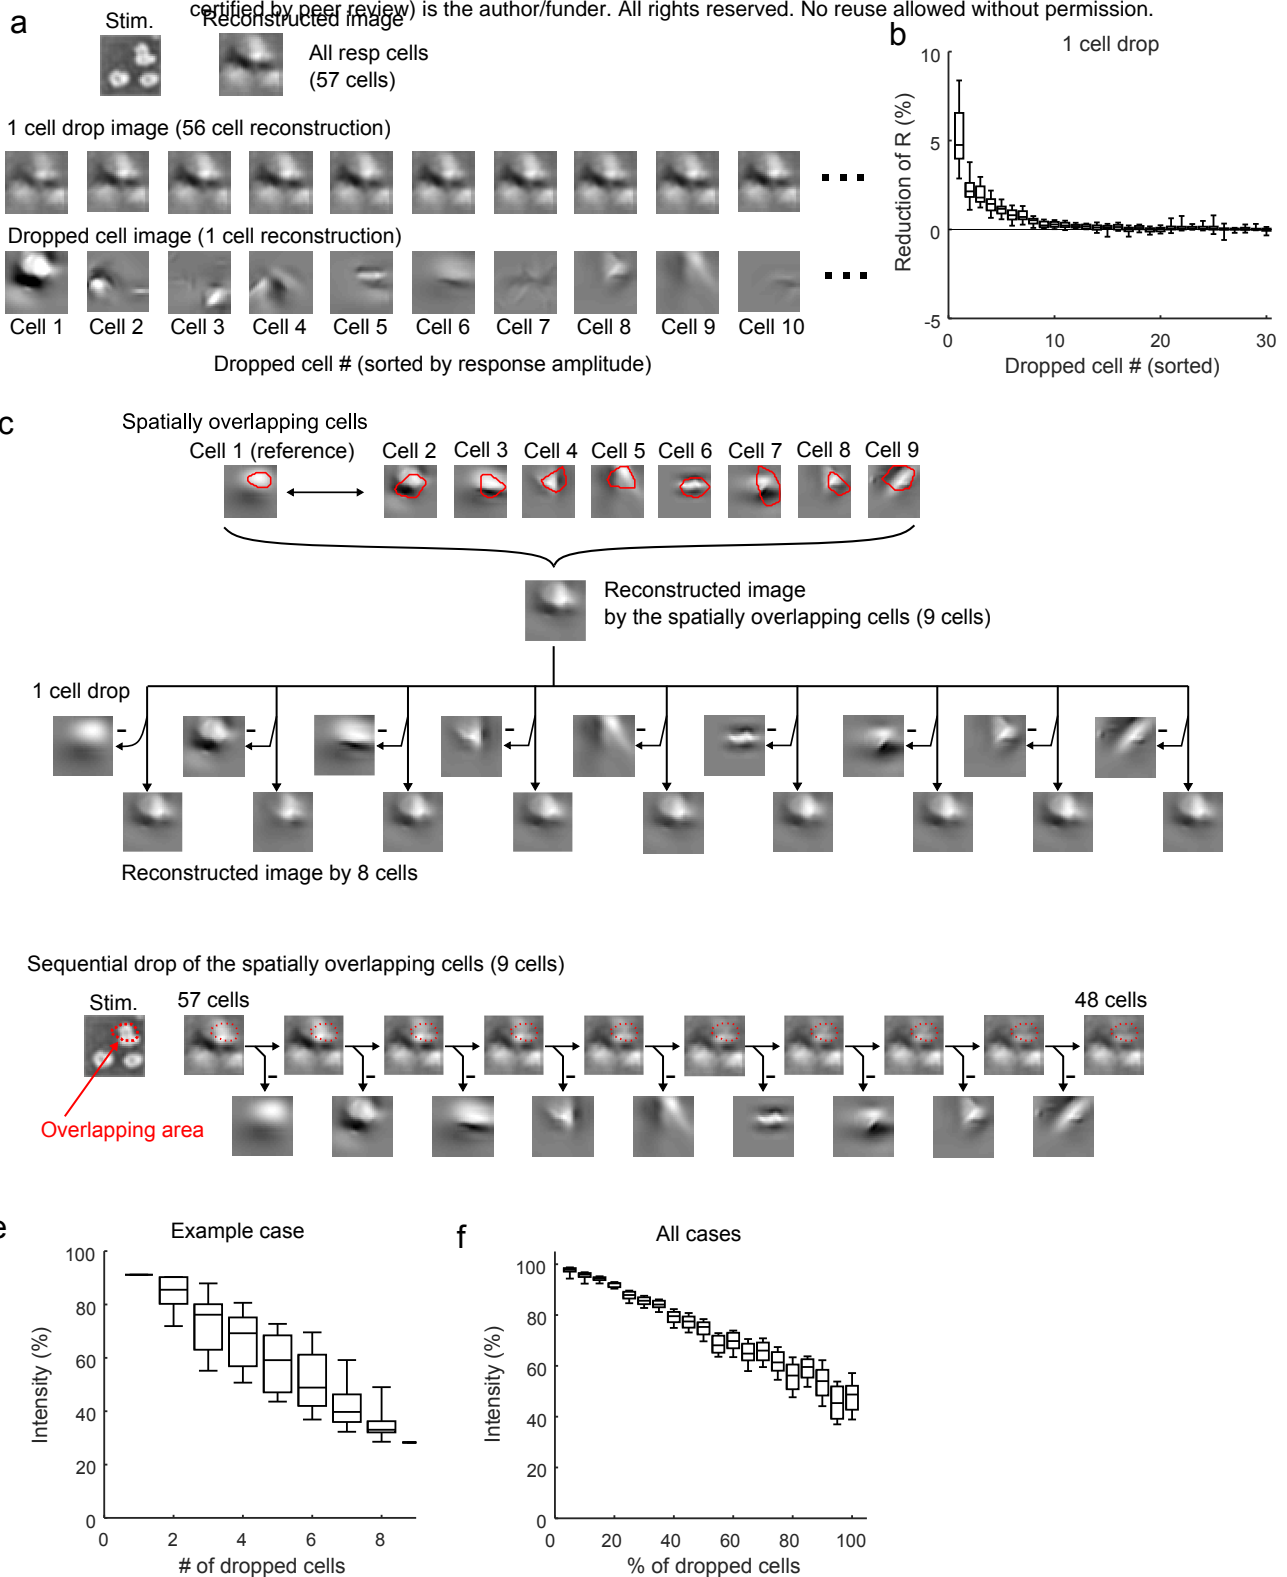

# Yoshida and Ohki, Figure 6

bioRxiv preprint doi: <https://doi.org/10.1101/300863>; this version posted July 30, 2018. The copyright holder for this preprint (which was not certified by peer review) is the author/funder. All rights reserved. No reuse allowed without permission.

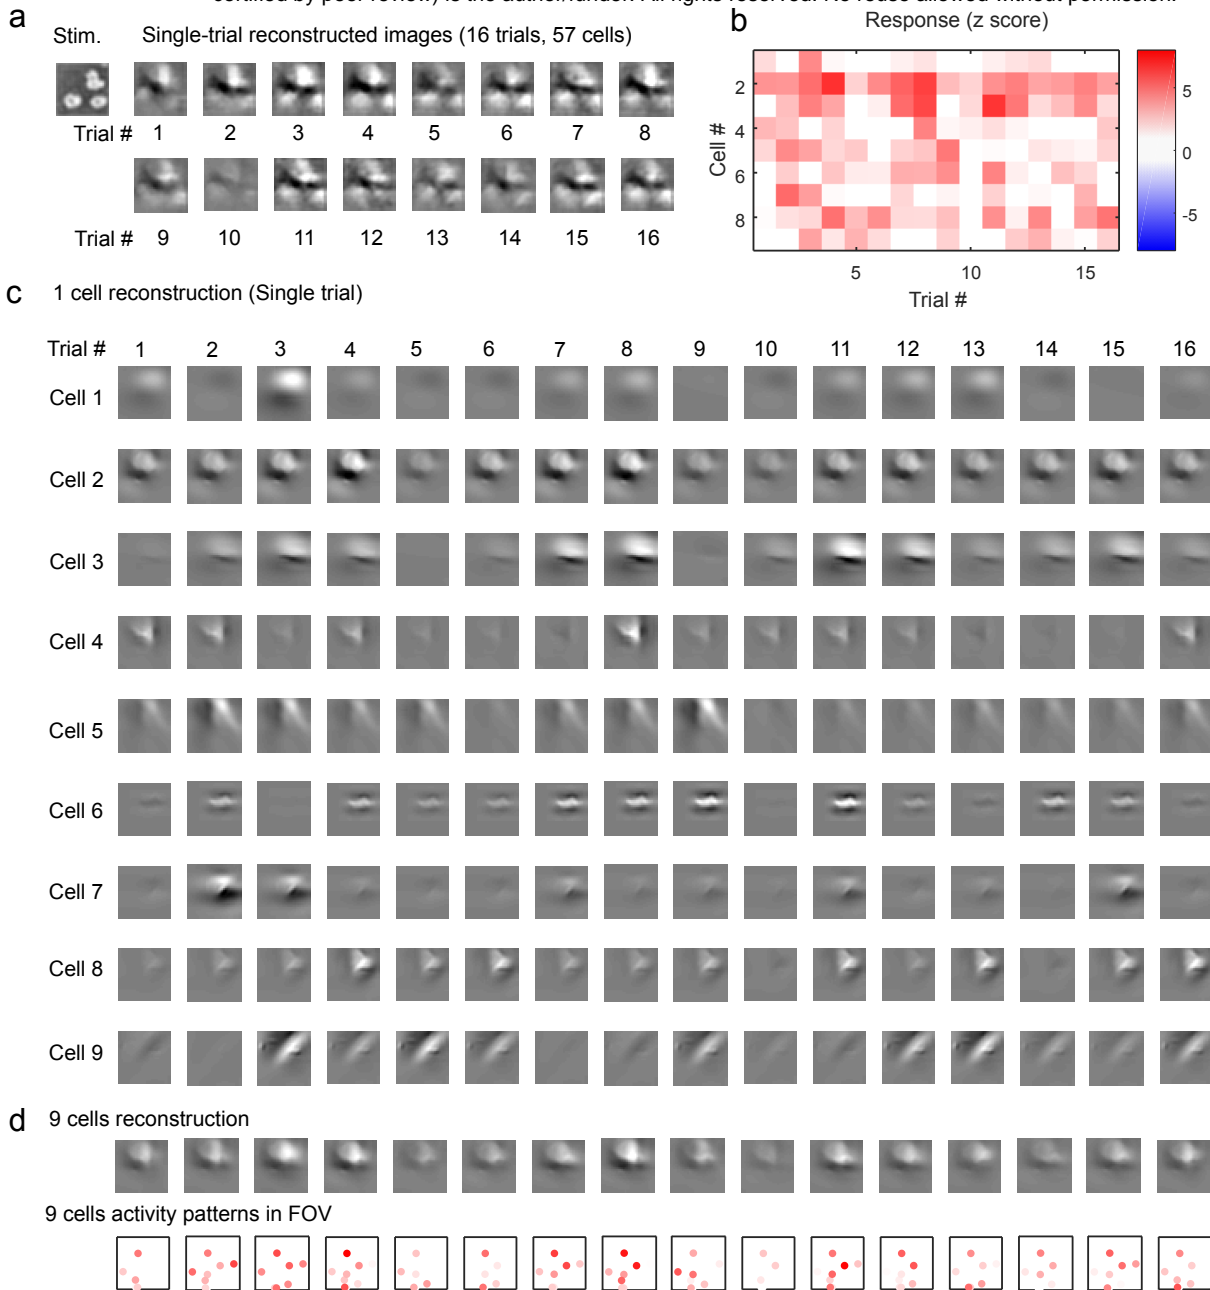

# Yoshida and Ohki, Fgiure 7

bioRxiv preprint doi: <https://doi.org/10.1101/300863>; this version posted July 30, 2018. The copyright holder for this preprint (which was not certified by peer review) is the author/funder. All rights reserved. No reuse allowed without permission.

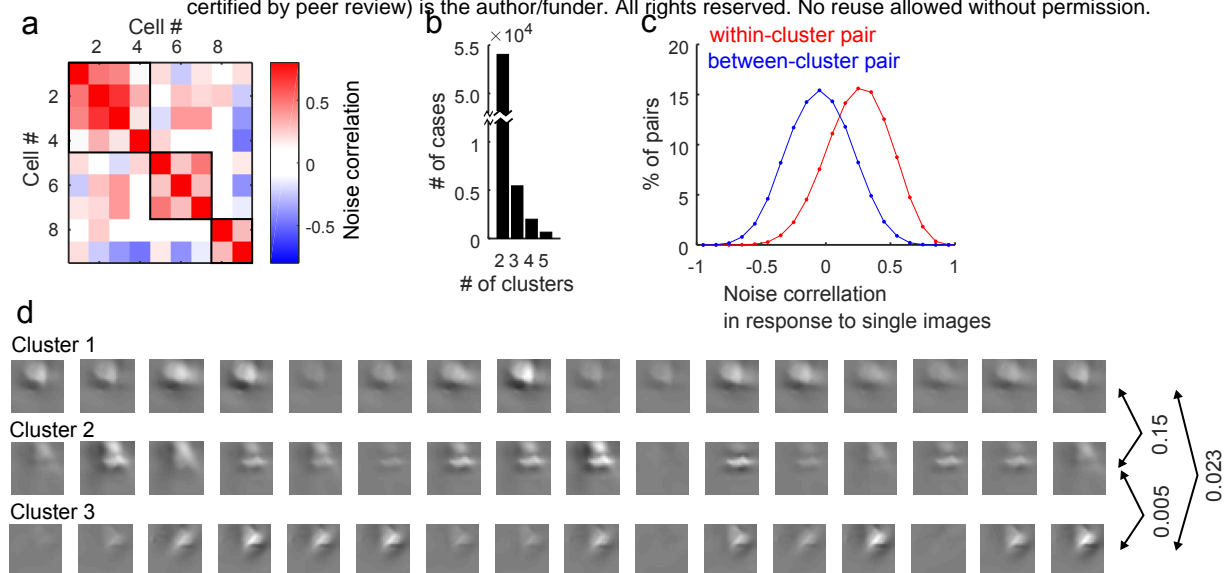

# Yoshida and Ohki, Figure 8

bioRxiv preprint doi: <https://doi.org/10.1101/300863>; this version posted July 30, 2018. The copyright holder for this preprint (which was not certified by peer review) is the author/funder. All rights reserved. No reuse allowed without permission.

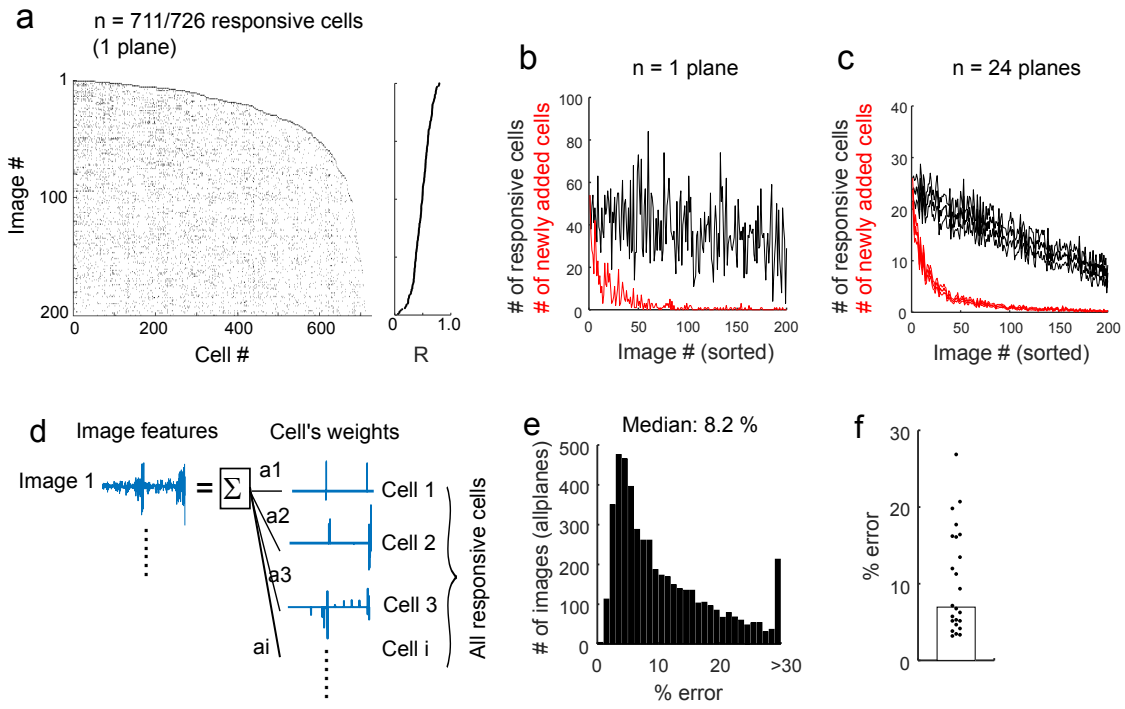

# Yoshida and Ohki, Supplementary Figure 1

bioRxiv preprint doi: <https://doi.org/10.1101/300863>; this version posted July 30, 2018. The copyright holder for this preprint (which was not certified by peer review) is the author/funder. All rights reserved. No reuse allowed without permission.

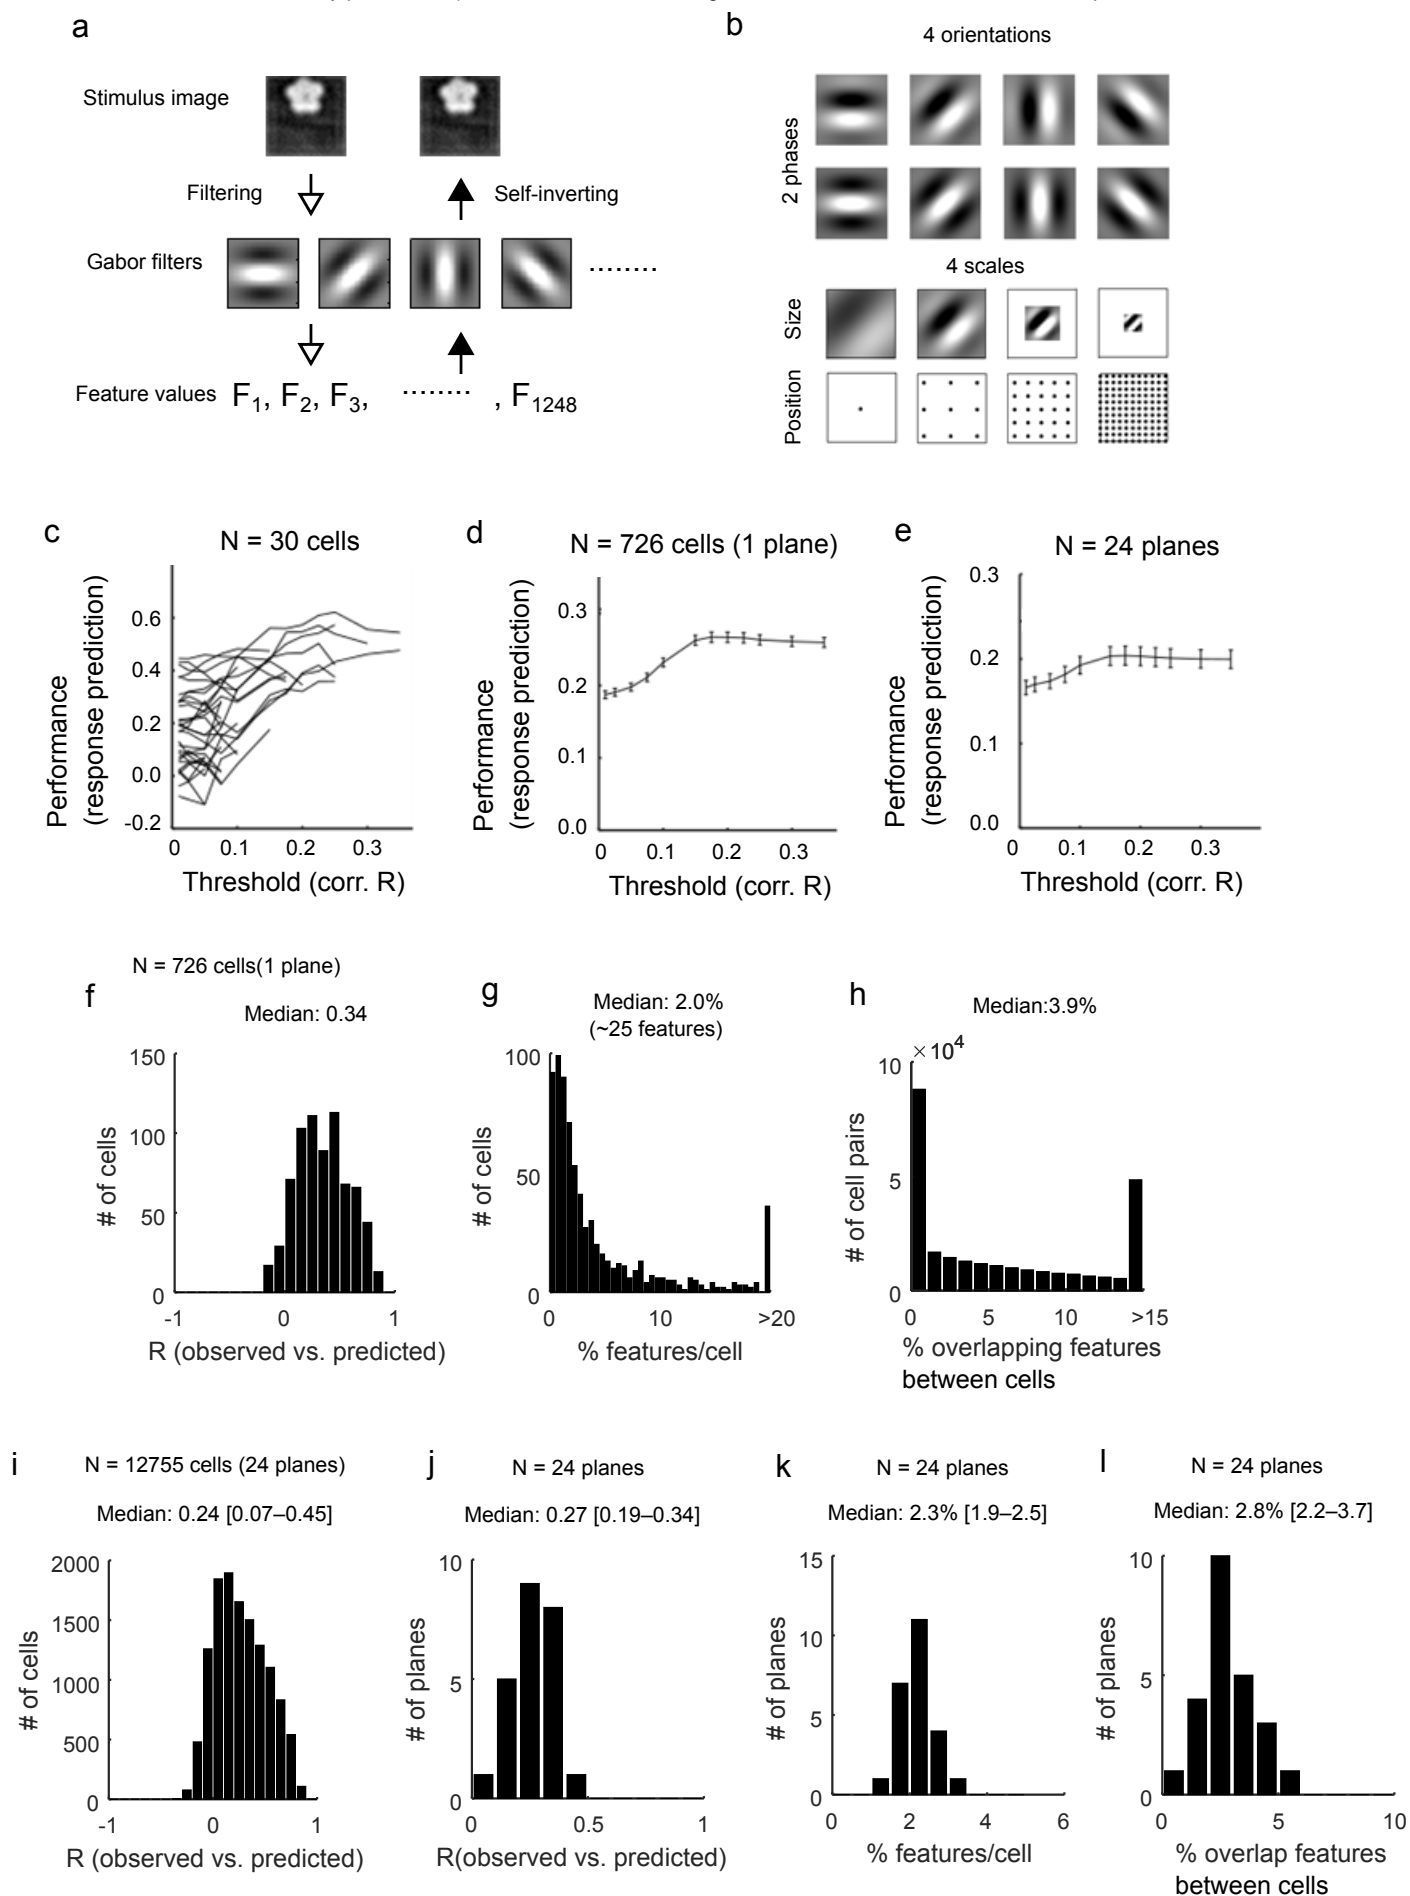

# Yoshida and Ohki, Supplementary Figure 2

bioRxiv preprint doi: <https://doi.org/10.1101/300863>; this version posted July 30, 2018. The copyright holder for this preprint (which was not certified by peer review) is the author/funder. All rights reserved. No reuse allowed without permission.

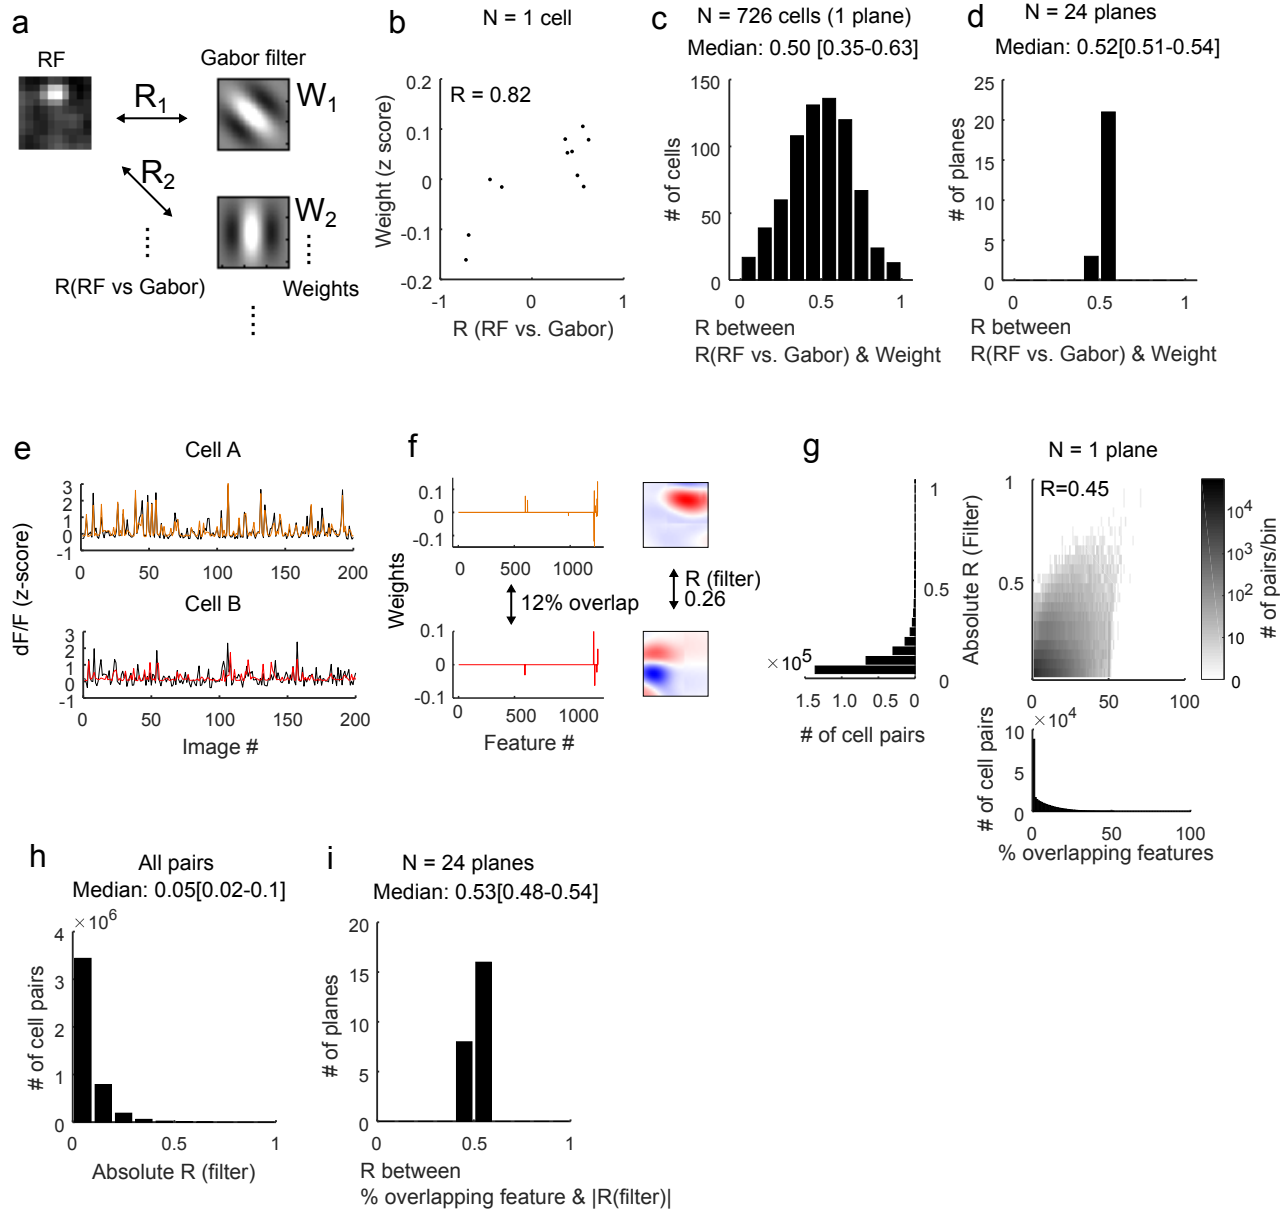

# Yoshida and Ohki, Supplementary figure 3

## a Response prediction (Encoding)

Image reconstruction (Image reconstruction)

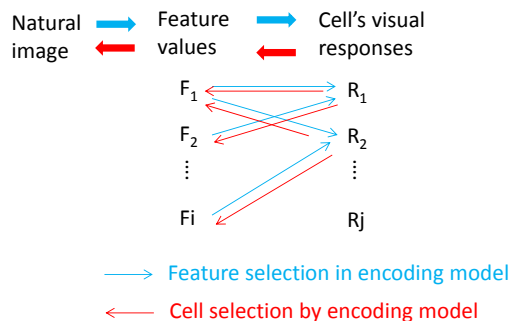

## b

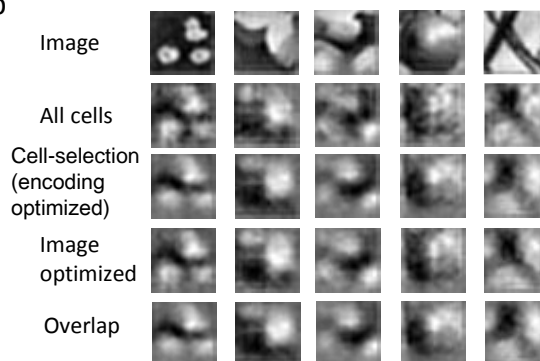

## c

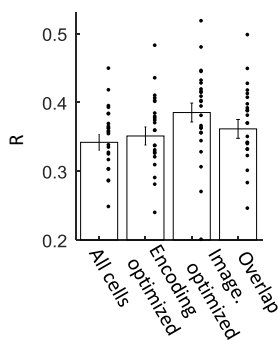

## d

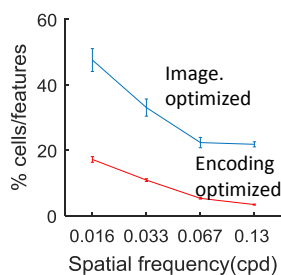

## e

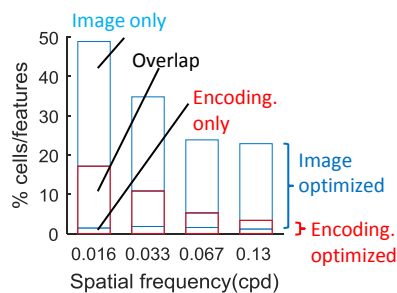

## f

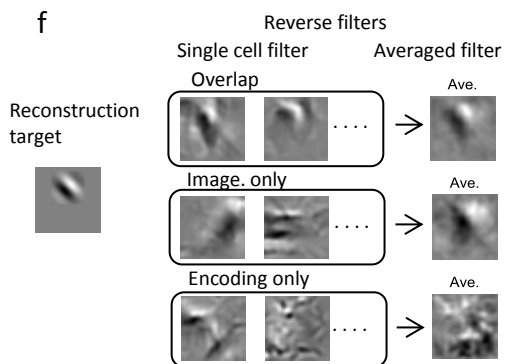

## g

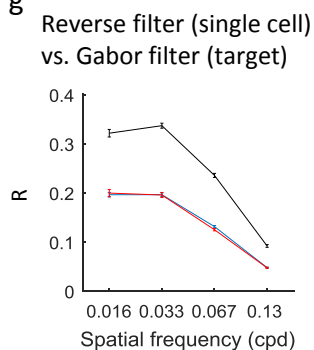

## h

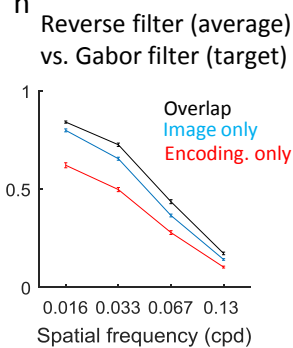

## Yoshida and Ohki, Supplementary figure 4

bioRxiv preprint doi: <https://doi.org/10.1101/300863>; this version posted July 30, 2018. The copyright holder for this preprint (which was not certified by peer review) is the author/funder. All rights reserved. No reuse allowed without permission.

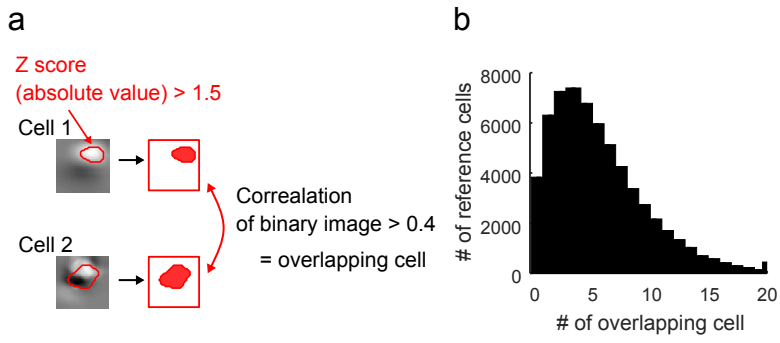



Yoshida and Ohki, Supplementary figure 5

bioRxiv preprint doi: <https://doi.org/10.1101/300863>; this version posted July 30, 2018. The copyright holder for this preprint (which was not certified by peer review) is the author/funder. All rights reserved. No reuse allowed without permission.

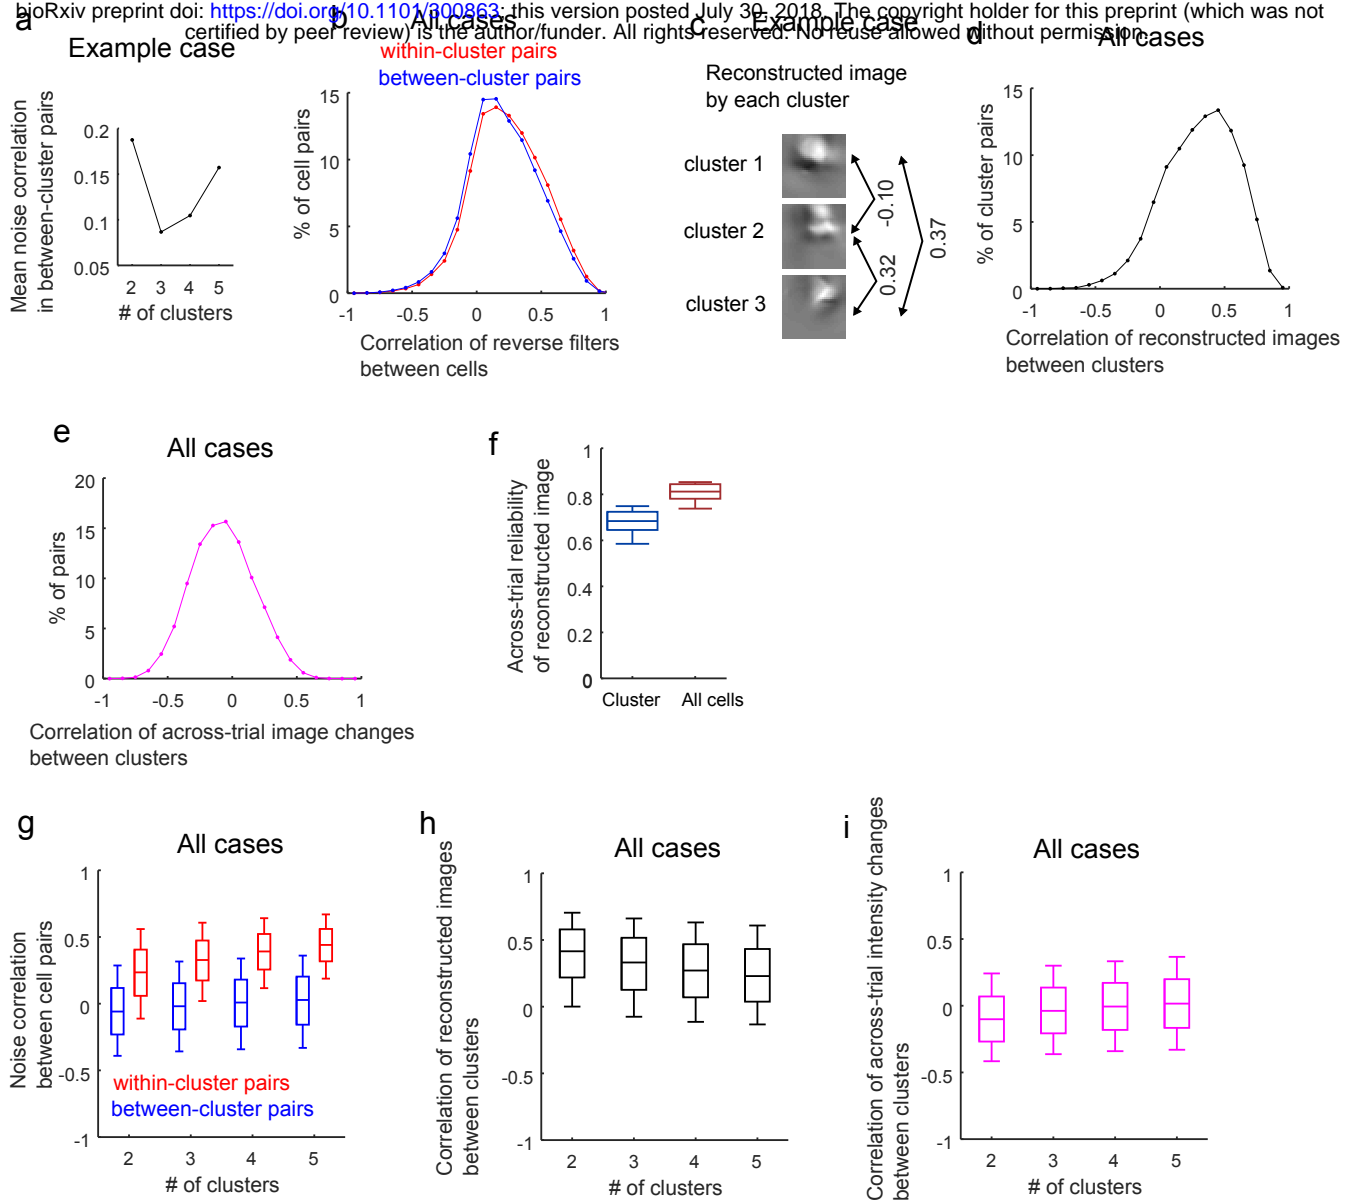

# Yoshida and Ohki, Supplementary figure 6

bioRxiv preprint doi: <https://doi.org/10.1101/300863>; this version posted July 30, 2018. The copyright holder for this preprint (which was not certified by peer review) is the author/funder. All rights reserved. No reuse allowed without permission.

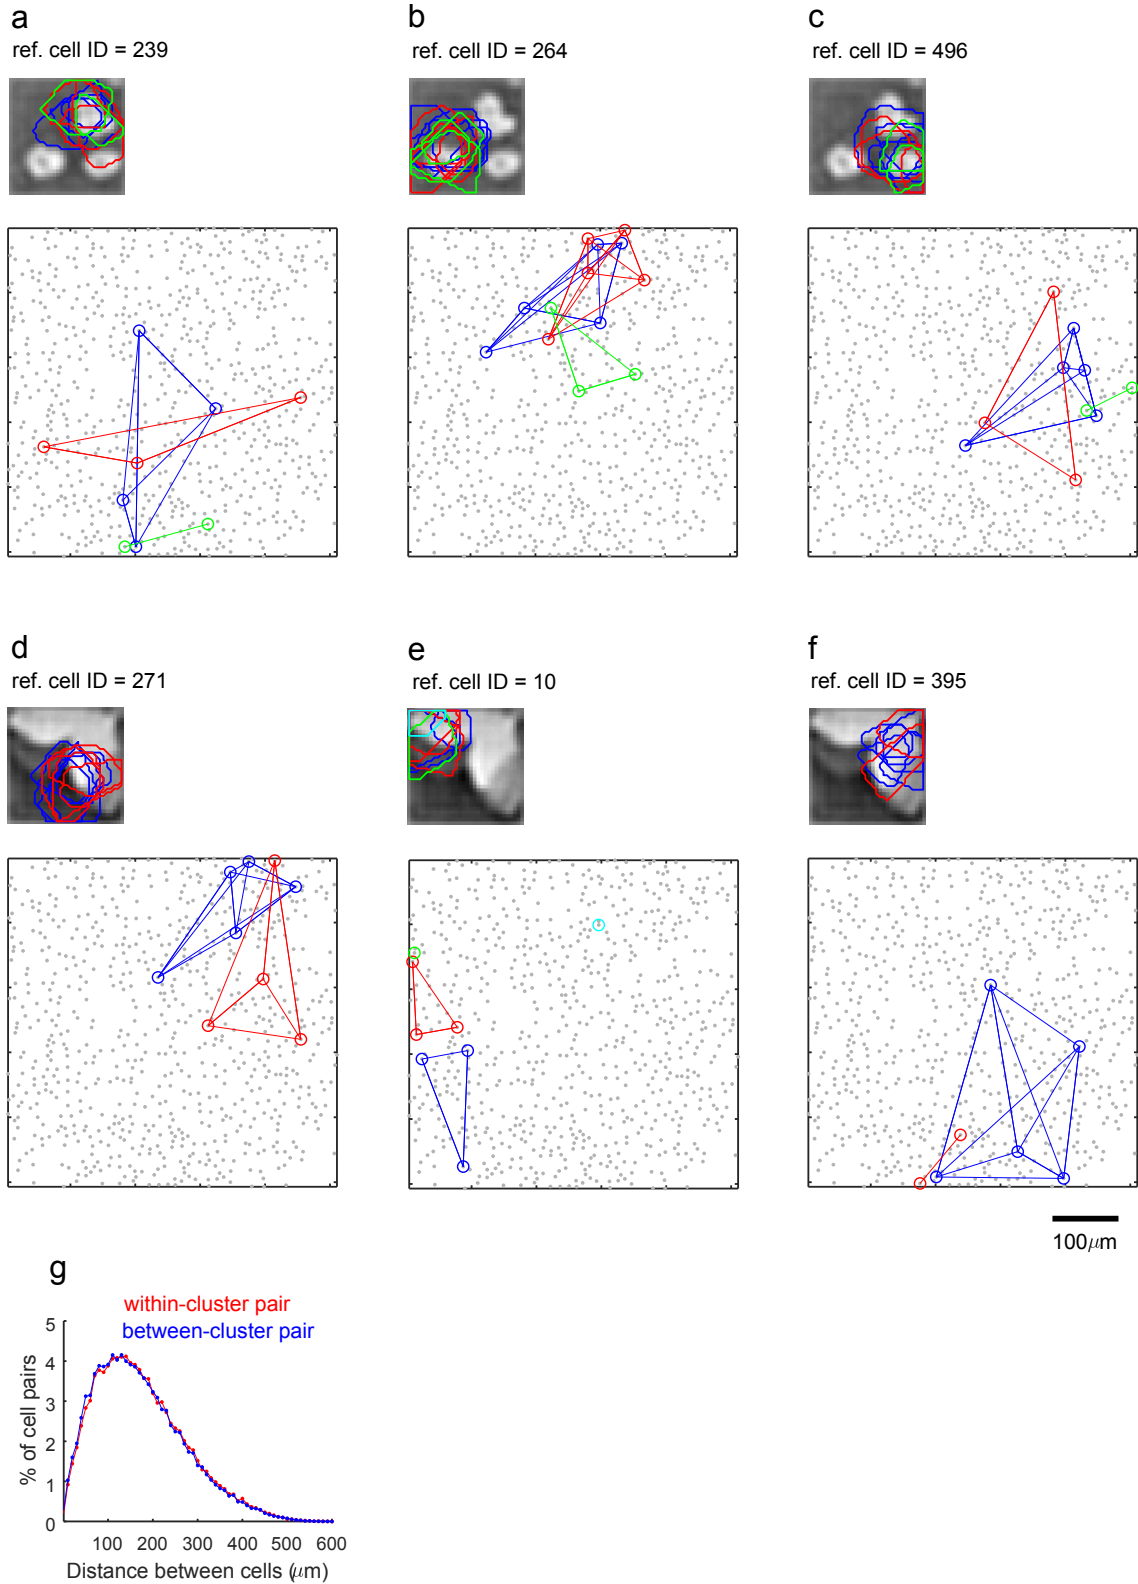

Source: https://www.biorxiv.org/content/10.1101/300863v2.full.pdf
