1 **Robust representation of natural images by sparse and variable population of active**  
2 **neurons in visual cortex**

3

4 Takashi Yoshida<sup>1,2,3,\*</sup> and Kenichi Ohki<sup>1,2,3,4,\*</sup>

5 1. Department of Physiology, The University of Tokyo School of Medicine, Tokyo, Japan.

6 2. Department of Molecular Physiology, Graduate School of Medical Sciences, Kyushu University, Fukuoka,

7 Japan

8 3. CREST, Japan Science and Technology Agency, Tokyo, Japan

9 4. International Research Center for Neurointelligence (WPI-IRCN), The University of Tokyo, Hongo,

10 Bunkyo-ku, Tokyo 113-0033, Japan

11

12 \*Correspondence: Kenichi Ohki, kohki@m.u-tokyo.ac.jp

13 Takashi Yoshida, takashiy@m.u-tokyo.ac.jp

14

15 **Abstract**

16 Natural scenes sparsely activate neurons in the primary visual cortex (V1). However, how sparsely active  
17 neurons robustly represent natural images and how the information is optimally decoded from the  
18 representation have not been revealed. We reconstructed natural images from V1 activity in anaesthetized and  
19 awake mice. A single natural image was linearly decodable from a surprisingly small number of highly  
20 responsive neurons, and an additional use of remaining neurons even degraded the decoding. This  
21 representation was achieved by diverse receptive fields (RFs) of the small number of highly responsive  
22 neurons. Furthermore, these neurons reliably represented the image across trials, regardless of trial-to-trial  
23 response variability. The reliable representation was supported by multiple neurons with overlapping RFs.  
24 Based on our results, the diverse, partially overlapping RFs ensure sparse and reliable representation. We  
25 propose a new representation scheme in which information is reliably represented while the representing  
26 neuronal patterns change across trials and that collecting only the activity of highly responsive neurons is an  
27 optimal decoding strategy for the downstream neurons

28

## 29 **Introduction**

30 Sensory information is thought to be represented by a relatively small number of active neurons in the sensory  
31 cortex. This sparse representation has been observed in several cortical areas<sup>1-9</sup> and is postulated to reflect an  
32 efficient coding of the statistical features in sensory inputs<sup>4, 10</sup>. However, it has not been determined how small  
33 numbers of active neurons represent sensory information and how the information is optimally decoded from  
34 the sparse representation.

35 In the primary visual cortex (V1), a type of neuron termed the simple cell has a receptive field (RF)  
36 structure that is spatially localized, oriented, and has a bandpass filter property with a specific spatial  
37 frequency. This RF structure is modelled by a two-dimensional (2D) Gabor function<sup>11</sup>. According to  
38 theoretical studies, a single natural image is represented by a relatively small number of neurons using  
39 Gabor-like RFs, whereas information about multiple natural scenes is distributed across the neuronal  
40 population<sup>10, 12, 13</sup>. Indeed, V1 neurons respond sparsely to natural scenes at the single cell level<sup>2, 3, 5-9</sup> and  
41 population level<sup>3, 5, 14</sup>. Population activity with higher sparseness exhibits greater discriminability between  
42 natural scenes<sup>5</sup>.

43 What types of information from natural scenes are represented in sparsely active neuronal populations in  
44 the brain? The visual contents of natural scenes or movies are reconstructed from single-unit activity in  
45 populations within the lateral geniculate nucleus (LGN) collected from several experiments<sup>15</sup> and functional  
46 magnetic resonance imaging (fMRI) data from the visual cortices<sup>16-19</sup>. However, it has not been addressed  
47 experimentally whether the visual contents of natural images are represented by small numbers of sparsely  
48 active neurons and whether V1 RFs in the brain are useful in representing the natural image. It has also  
49 remained to be revealed which decoding strategy is optimal for the sparse representation. In the sparse  
50 representation, a single natural image activates a small number of neurons strongly and some remaining  
51 neurons weakly. Whether only a small number of strongly active neurons represent information, or the  
52 remaining neurons also have additional information is an important question. Furthermore, do the sparsely  
53 active neurons reliably represent the natural image contents, regardless of trial-to-trial response variability?

54 Although a computational model<sup>20</sup> has suggested that sparse and overcomplete representation is  
55 the optimal representation for natural images with unreliable neurons, this model has not been  
56 examined experimentally.

57 We also addressed how visual information is distributed among neurons in a local population. Some  
58 neurons are “unresponsive” to visual stimuli (e.g., the response rate of the mouse V1 to visual stimuli is  
59 26–68%)<sup>21-27</sup>, indicating that only a subset of neurons represent sensory information. However, this may be  
60 partially attributed to incomplete coverage of stimulus properties on the RF properties of all neurons. Thus,  
61 there are two extreme possibilities: sparsely active neurons distributed among all neurons in a local population  
62 or only a specific subset of cells process the natural images. The proportion of neurons that are actually  
63 involved in information processing is a matter of debate<sup>28, 29</sup>.

64 Here, we examined how a small number of highly responsive V1 neurons represented natural image  
65 contents and how the information was optimally decoded from the sparse representation. Using two-photon  
66 Ca<sup>2+</sup> imaging, we recorded visual responses to natural images from local populations of single neurons in the  
67 V1 of anaesthetized and passively viewing awake mice. A small number of neurons (a few percent) exhibited  
68 large responses to each natural image, which was sparser than that predicted by the linear encoding model. On  
69 the other hand, more than 80% of neurons were activated by at least one of the natural images, revealing that  
70 most neurons in a local population are involved in processing natural images. We reconstructed the natural  
71 images from the activity to estimate the information about the visual contents. The visual contents of a single  
72 natural image were linearly decodable from a small number of highly responsive neurons, and an additional  
73 use of remaining neurons even degraded the reconstruction performance. The highly responsive neurons  
74 showed diverse RFs, which helped small numbers of neurons represent complex natural images. Furthermore,  
75 the responsive neurons reliably represent the image, regardless of trial-to-trial response variability. The reliable  
76 image representation was supported by multiple neurons with partially overlapping representation. Further,  
77 neurons with overlapping representation were almost independently active across trials, which was beneficial  
78 to the reliable image representation across trials. Responsive neurons were only slightly overlapped between

79 images, and many natural images were represented by the combinations of responsive neurons in a population.  
80 Finally, visual features encoded by neurons in a local population were sufficient to represent all the natural  
81 images used in the present study. These results revealed a new robust representation of a natural image by a  
82 small number of neurons in which information is reliably represented while the representing neuronal patterns  
83 change across trials and imply that collecting only the activity of highly responsive neurons is an optimal  
84 decoding strategy for the sparse representation. Preliminary results of this study have been published in an  
85 abstract form<sup>30</sup> and on a preprint server<sup>31</sup>.

86

## 87 **Results**

88 The main purpose of this study is to examine whether and how natural images are represented in the sparse  
89 representation scheme. We first confirmed the sparse response to natural images in our dataset. Next, we  
90 showed that the natural images were reconstructed from a relatively small number of responsive neurons.  
91 Finally, we addressed how the small number of neurons reliably represented natural images, regardless of  
92 trial-to-trial response variability.

93

### 94 **Sparse visual responses to natural images in anaesthetized mouse V1**

95 We presented flashes of natural images as visual stimuli (200 images. Each image was consecutively flashed  
96 three times in a trial. Flash duration: 200 ms, flash interval: 200 ms. At least 12 trials for each image. Fig. 1a,  
97 see Methods). Using two-photon calcium ( $\text{Ca}^{2+}$ ) imaging, we simultaneously recorded the activity of several  
98 hundreds of single neurons from layers 2/3 and 4 of anaesthetized mouse V1 (560 [284–712] cells/plane,  
99 median [25–75<sup>th</sup> percentiles],  $n = 24$  planes from 14 mice, 260–450 microns in depth, see Fig. 1b for  
100 representative response traces).

101 We first found that most neurons in a local population were visually responsive. Responsive neurons were  
102 determined by one-way analysis of variance (ANOVA,  $p < 0.01$ , data with responses to 200 images and one  
103 baseline in each trial, see Methods). Across planes, the percentage of responsive neurons was 85% [77–90%]

104 (Fig. 1f). We also estimated a false positive rate of this criterion with label-shuffled data and found a 1.0%  
105 [0.9–1.0%] false positive rate. Thus, most neurons were involved in visual processing.

106 We next examined what percentage of neurons responded to each image. For each responsive neuron  
107 determined by the ANOVA, a significant response to each image was defined by a t-test and amplitude  
108 threshold ( $p < 0.01$  using a t-test and  $>10\%$  trial-averaged response change, activity during stimulus vs.  
109 baseline just before the stimulus) (see Methods and Supplementary Fig. 1). Fig. 1c presents plots of significant  
110 visual response events for all images (x-axis) across all neurons (y-axis) in an example plane ( $n = 726$  cells,  
111 depth: 360 microns from the brain surface). Hereafter, we call these significant responses highly responsive. In  
112 the example plane, each responsive neuron responded to 4.5% (9/200) images (Fig. 1c, right panel), and a few  
113 to 10% of neurons were highly responsive to a single image (5.1% (37/726) cells/image, Fig. 1c, bottom panel),  
114 indicating sparse visual responses to natural images. Across planes, the percentage of responsive neurons for  
115 each image was 2.5% [1.8–3.0%] (Fig. 1g, Supplementary fig. 1b). Thus, only a few percent of neurons were  
116 responsive for each image. This low response rate to each image was not due to poor recording conditions. The  
117 same neurons responded well to moving gratings (The percentage of responsive cells for at least one direction:  
118 49% [45–56%]. The percentages of responsive cells for each direction of grating: 12.5% [11–14.8%], Fig. 1h  
119 and 1i).

120 The highly responsive neurons only slightly overlapped between images. Fig. 1d presents representative  
121 activity patterns for three natural images (Fig. 1d, left column). Each image activated different subsets of  
122 neurons that exhibited small overlaps between images (Fig. 1d, right column). Of the responsive cells, 5.4%  
123 exhibited overlap between two images (25–75<sup>th</sup> percentiles for 24 planes: 4.8–6.0%, Fig. 1j). We further  
124 computed the distributions of the response amplitudes to single images (Fig. 1e). Only a small number of  
125 neurons exhibited visual responses with greater amplitudes, which is a property of a sparse representation (Fig.  
126 1e). The population sparseness<sup>2,3</sup>, a measure of a sparse representation, was comparable to that of a previous  
127 report for mouse V1<sup>5</sup> (0.36 [0.30–0.42], Fig. 1k, see Methods). Thus, each natural image activated a relatively  
128 small number of neurons, whereas most neurons in a local population were visually responsive, suggesting the

129 sparsely distributed representation of natural images in V1 that was originally proposed in a previous study<sup>10</sup>.  
130 The latter result also represents the first report of the visual responsiveness of most neurons in mouse V1 to  
131 natural image stimuli<sup>28, 29</sup>.

132

### 133 **Partially overlapping representations of visual features among local V1 populations**

134 We created an encoding model for the visual responses of an individual neuron to examine visual features  
135 represented by each neuron. We used a set of Gabor wavelet filters (1248 filters, Fig. 2a and 2b) to extract the  
136 visual features from the natural images. Down sampled natural images ( $\mathbf{I}$ ) were applied to Gabor filter ( $\mathbf{G}_{\text{fwd}}$ )  
137 and were transformed into sets of feature values (Gabor feature values,  $\mathbf{F}$ ).

$$\mathbf{F} = \mathbf{G}_{\text{fwd}} * \mathbf{I}$$

138 For each neuron, we first selected the Gabor features that exhibited strong correlations with the visual response.  
139 The correlation threshold for the selected feature was adjusted to maximize the visual response prediction in  
140 each neuron (Fig. 2c. Supplementary Fig. 2a and 2b). Then, the visual responses of a single cell ( $\mathbf{R}^k$ , the  $k$ th  
141 cell's responses) were represented by a linear regression of the selected feature values ( $\mathbf{F}_{\text{select}}$ ) followed by  
142 non-linear scaling ( $\text{NL}(\cdot)$ , Fig. 2c, see Methods).

$$\mathbf{R}^k = \text{NL}(\mathbf{W}^k * \mathbf{F}_{\text{select}} + b^k)$$

143 Parameters of the regression model (weights,  $\mathbf{W}^k$  and a bias,  $b^k$ ) were estimated with 90% of the dataset,  
144 and the response prediction performance of the model was estimated with the remaining 10% dataset (10-fold  
145 cross-validation (CV).  $\mathbf{W}^k$  and  $b^k$  were estimated in each CV). The model was obtained independently for  
146 each cell (i.e., for each  $k$ ).

147 The results of two example neurons are shown in Fig. 2d and 2e. The response prediction performances  
148 (the correlation coefficients between the observed responses and the responses predicted by the model) were  
149 0.82 and 0.88. These neurons were represented by 12 (out of 1248) Gabor features (Fig. 2d and 2d, right  
150 panels), and their encoding filters (weighted sums of the Gabor filters) were spatially localized (Fig. 2d and 2d,  
151 insets in the right panels).

152 The median prediction performance of the encoding model was 0.32 in the example plane presented in  
153 Fig. 1 (25–75<sup>th</sup> percentiles: 0.15–0.50, n = 726 cells) and 0.21 in all cells across planes (25–75<sup>th</sup> percentiles:  
154 0.06–0.42, n = 12,755 cells across 24 planes, Supplementary Fig. 2d). The non-linear scaling step suppressed  
155 weak predicted responses and enhanced strong predicted responses (Fig. 2f and 2g), suggesting that this  
156 non-linear step enhanced the sparseness of the predicted response obtained from the linear step (i.e., linear  
157 regression of feature values). The non-linear step also slightly enhanced the performance (Supplementary Fig.  
158 2c).

159 The visual response of an individual neuron was represented by a small number of Gabor features. On  
160 average, each neuron encoded 20 (out of 1248) features in the example plane (25–75<sup>th</sup> percentiles: 8–52. Fig.  
161 2h) and 21 features in all recorded neurons (25–75<sup>th</sup> percentiles: 8–51, n = 12,755 cells, Fig. 2ig and  
162 Supplementary Fig. 2e). The features encoded by each neuron were spatially localized and had similar  
163 orientations (Supplementary Fig. 3a–d). These features were also related to the RF structure of each neuron.  
164 The RF structure of each neuron was estimated using the regularized inverse method<sup>32-34</sup> (see Methods). The  
165 regression weights of the Gabor features in the encoding model were positively correlated with the similarity  
166 between the corresponding Gabor filter and the RF structure (Supplementary Fig. 3e–3h).

167 The Gabor features encoded by one neuron partially overlapped with those of other neurons (Fig. 2j). In  
168 the example neurons (Fig. 2d and 2e), none of the features overlapped. For all neuron pairs, the median overlap  
169 was 1.0% (25–75<sup>th</sup> percentile: 0.0–5.6% relative to features represented by each cell, Fig. 2j and  
170 Supplementary Fig. 2f). The feature overlap between neurons was positively correlated with the similarity of  
171 the forward filter structure (Supplementary Fig. 3i and j). Furthermore, the diverse features encoded by  
172 individual neurons were also reflected in the distribution of forward filter similarity between cells (correlation  
173 coefficient between reverse filters: 0.0 [-0.03–0.04], Supplementary Fig. 3k). Based on these findings, the  
174 Gabor features encoded by individual neurons in a local population were highly diverse and partially  
175 overlapped.

176 The analysis of the encoding model also revealed how the individual Gabor features were encoded across



177 neurons (upper left and bottom panels in Fig. 2h). As the spatial frequency (SF) of the Gabor filter increased  
178 (i.e. the scale decreased), the corresponding feature contributed to the visual responses of fewer neurons (Fig.  
179 2h bottom). This pattern likely reflected the fact that Gabor filters with a low SF (i.e., a large scale) covered  
180 more of the neuron's RF, whereas Gabor filters with a high SF (i.e., a small scale) affected the responses of  
181 fewer neurons. Furthermore, almost all features contributed to the responses of at least one cell  
182 (Supplementary Fig. 2g).

183

### 184 **Image reconstruction from the activity of the neuronal population**

185 We next examined whether the features encoded in a local population of neurons represent the visual contents  
186 of the natural images. To examine this, we reconstructed stimulus images from the neuronal activity<sup>15-19</sup>. In the  
187 image reconstruction model, each Gabor feature value ( $\mathbf{F}^j$ , the  $j$ th Gabor feature values) was subjected to a  
188 linear regression analysis of the activity data of multiple neurons ( $\mathbf{R}$ ) with model parameters of weights ( $\mathbf{H}^j$ )  
189 and a bias ( $c^j$ ) (Fig. 3a and b).

$$\mathbf{F}^j = \mathbf{H}^j * \mathbf{R} + c^j$$

190 Each Gabor feature value was independently reconstructed (i.e.,  $\mathbf{H}^j$  and  $c^j$  were estimated for each feature,  $j$ ).  
191 Then, the sets of reconstructed feature values ( $\hat{\mathbf{F}} = [\hat{\mathbf{F}}^1; \dots; \hat{\mathbf{F}}^{1248}]$ ,  $\hat{\mathbf{F}}^j$ : reconstructed  $j$ th feature values) were  
192 transformed into images ( $\hat{\mathbf{I}}$ ) using Gabor filter for image reconstruction ( $\mathbf{G}_{\text{rev}}$  Fig. 3b, see Methods).

$$\hat{\mathbf{I}} = \mathbf{G}_{\text{rev}} * \hat{\mathbf{F}}$$

193 The reconstruction performance was estimated with a different test dataset from the training dataset used in the  
194 regression analysis (10-fold CV with the same data split to that in the encoding model.  $\mathbf{H}^j$  and  $c^j$  were  
195 estimated in each CV).

196 We first used a model in which each feature value was reconstructed from all neurons (all-cell model, Fig.  
197 3a). In the example plane ( $n = 726$  neurons, presented in Figs. 1 and 2), the rough structures of the stimulus  
198 images were reconstructed from the population activity (Fig. 3c). The pixel-to-pixel correlation between  
199 stimulus and reconstructed images (similarity of image patterns) was 0.43 [0.35–0.55] (median [25–75<sup>th</sup>]

200 percentiles] of 200 images, dataset 1) in the example plane ( $n = 726$  cells, Fig. 3e upper panel) and 0.33  
201 [0.30–0.37] across all planes ( $n = 24$  planes, Fig. 3f). The coefficient of determination (CD, goodness of model  
202 prediction, see Methods) was 0.14 [0.02–0.26] in the example plane and 0.08 [0.07–0.1] across planes (Fig. 3e  
203 bottom and 3g). We further confirmed that our image reconstruction could be used for another dataset (dataset  
204 2, 1000–2000 images that did not include original 200 images). The performances of dataset 2 were similar to  
205 those of the original dataset (R: 0.45 [0.34–0.52], CD: 0.19 [0.11–0.25],  $n = 4$  planes from three mice. Fig. 3d,  
206 green lines in Fig. 3f and 3g). Thus, the visual contents of natural images were extracted linearly from the  
207 neuronal activity of the local population.

208 We next used another reconstruction model in which each feature was reconstructed from a subset of  
209 neurons that showed strong correlations between the feature values and responses (cell-selection model, Fig.  
210 3a). In the cell-selection model, each neuron participated in reconstructions of subsets of features that the  
211 neuron encoded in the response prediction model (Fig. 3b, see Methods). The reconstruction performances of  
212 the cell-selection model were almost comparable or even slightly higher than those of the all-cell model  
213 (Dataset 1, R: 0.33 [0.3–0.38].  $P = 0.006$  by signed rank test compared to all-cell model. CD: 0.10 [0.08–0.14].  
214  $P = 1.8 \times 10^{-5}$  by signed rank test.  $N = 24$  planes. Dataset 2, R: 0.45 [0.33–0.53],  $P = 0.9$  by signed rank test  
215 compared to all-cell model. CD: 0.19 [0.11–0.25],  $P = 0.9$  by signed rank test.  $N = 4$  planes. Fig. 3c–g). The  
216 performances were not substantially affected by the cell-selection step using nested CV (Supplementary fig. 4,  
217 see Methods).

218 In the cell-selection model, each neuron participated in the reconstructions of a small number of features  
219 that each neuron encoded (Fig. 3b; also see Fig. 2 for encoding model analyses). We examined how the  
220 reconstruction performance was affected by an increase or decrease in the number of features for which each  
221 neuron participated in the reconstruction and found that the original model demonstrated nearly optimal  
222 performances (Supplementary Fig. 5a–c). Thus, how the individual neurons are involved in the reconstruction  
223 of Gabor features is one of the important factors of the image reconstruction, and the cell-selection model  
224 captures nearly optimal feature-cell assignment for the reconstruction.

225 We also examined the image reconstruction performance in each spatial frequency component (0.02–0.18  
226 cycle/degrees, cpd). Performances of lower spatial frequencies (0.02 and 0.04 cpd) were better than those of  
227 higher spatial frequencies (0.09 and 0.18 cpd) (R: 0.65, 0.53, 0.18, and 0.04, and CD: 0.24, 0.23, 0.02,  
228 and -0.03 for 0.02, 0.04, 0.09, and 0.18 cpd, respectively. Supplementary Fig. 5d–f). This may reflect  
229 the spatial frequency preference of mouse V1 neurons<sup>35</sup>. V1 neurons in a local population mainly represented  
230 information about the low-spatial-frequency components of the natural image.

231

### 232 **The visual contents of natural images are linearly decodable from small numbers of responsive neurons**

233 A single natural image strongly activated a small number of neurons (Fig. 1). We next examined whether the  
234 small number of highly responsive neurons mainly represents a single image or the remaining neurons also  
235 contained information about the image. For this purpose, we changed the number of neurons used in the  
236 reconstruction of each image and examined how the reconstruction performance was affected. In this image  
237 reconstruction from a subset of cells, the weights of image reconstruction model were estimated based on the  
238 weights of the cell-selection model (See equation 5 in Methods). The weights were separately computed for  
239 each subset of cells, and a different set of cells was used for each image.

240 The results of the example plane are presented in Fig. 4a–4c. In each image, neurons were sorted by  
241 visual response amplitude (descending order) first among the responsive neurons (red dots in Fig. 4a–4c) and  
242 then among the remaining neurons (black dots in Fig. 4a–4c). The image was reconstructed by the top N  
243 neurons (N = 1–726 cells), and the reconstruction performances were plotted against the number of neurons  
244 used (Fig. 4a–4d). Approximately 20 neurons were sufficient to reconstruct the images with a level of peak  
245 performance, on average (Fig. 4d and 4e). The reconstruction performances of highly responsive neurons were  
246 higher than those of all cells (left panels in Fig. 4g and 4h). Furthermore, when we searched the peak  
247 performance within the number of responsive neurons in each image, the peak performances were obtained  
248 with fewer neurons than the highly responsive neurons (right panels in Fig. 4g and h). Based on these results,  
249 highly responsive neurons mainly represent the image, and the additional use of remaining neurons even

250 decreases the reconstruction performance.

251 The features represented by individual neurons should be diverse to represent a natural image using a  
252 small number of neurons. Fig. 4f illustrates how individual responsive neurons contributed to image  
253 reconstruction in the case presented in Fig. 4a. Each neuron had a specific pattern of contributions (reverse  
254 filter: sum of Gabor filters  $\times$  weights, see Methods), and the patterns varied across neurons (Fig. 4f, top  
255 panels) while partially overlapping in the visual field. In neuron pairs that were responsive to the same image,  
256 the number of overlapping Gabor features slightly increased compared to all pairs, but the percentage of  
257 overlapping features was still less than 5% (Responsive cell pair: 3.2% [0–13%] of features for all pairs and  
258 4.3% [3.4–5.5%] across planes. All cell pairs: 1.0% [0–5.6%] for all pairs and 1.0% [0.9–1.2%] across planes,  
259 Fig. 4i–4k, cf. Fig. 2j, Supplementary Fig. 2f). These small overlaps and the diversity in the represented  
260 features among neurons should be useful for the representation of a natural image by a relatively small number  
261 of responsive neurons.

262

### 263 **Robust image representation by neurons with spatially overlapping representation**

264 We next examined whether a single image was robustly represented by a small number of responsive neurons.  
265 We computed the reconstruction performance after dropping individual responsive cells (Fig. 5a and 5b; The  
266 cell # on the x-axis is the same as in Fig. 4d). The drop of a single cell exerted only a small effect on the  
267 reconstructed image (middle panels in Fig. 5a). A reduction of approximately 5% in reconstruction  
268 performance was observed for the best-responding neurons, and most neurons did not exhibit a change in  
269 performance (Fig. 5b). Thus, an image was robustly represented by highly responsive neurons against a  
270 single-cell drop.

271 This robustness against cell drop was due to the spatial overlap of representation (i.e., reverse filters)  
272 among responsive neurons (Fig. 5c). To analyse this point, we selected a set of overlapping cells for each  
273 responsive neuron; the overlapping cells consisted of one responsive neuron as a reference (cell 1) and other  
274 responsive neurons whose representation areas partially overlapped with that of the reference cell (top panels

275 in Fig. 5c and Supplementary Fig. 6a-d, see Methods). Then, we examined the effects of cell drop on the  
276 reconstruction of a local part of the image from the overlapping cells. Although a single-cell drop had almost  
277 no effect on the reconstructed local image (bottom panels in Fig. 5c), a sequential drop of these cells gradually  
278 degraded the part of the reconstructed image (Fig. 5d). The pixel-to-pixel correlation between the stimulus and  
279 the reconstructed image in the overlapping area gradually decreased as the number of dropped cells increased  
280 (Fig. 5e and 5f). Based on these results, the robust image representation was due to neurons with spatially  
281 overlapping representations.

282

### 283 **Overlapping representation provides a reliable image representation, regardless of trial-to-trial** 284 **variability**

285 We further analysed whether the overlapping representation was useful in reducing the trial-to-trial variability  
286 in the image representation. Cortical neurons often show trial-to-trial variability in response to repetitions of  
287 the same stimulus. If neurons with spatially overlapping or similar representations showed independent or  
288 negatively correlated activity, the integration of activity among these neurons should reduce the variability in  
289 image representations across trials<sup>36-38</sup>.

290 The pattern of reconstructed image was reliably represented across trials regardless of the trial-to-trial  
291 response variability. Fig. 6a shows the trial-to-trial variability of the reconstructed images of the example case  
292 (shown in Fig. 5). Single-trial reconstructed images from all responsive neurons (55 cells) were generally  
293 stable across trials and were distorted in only a few trials (e.g., trial 10, Fig. 6a top). By contrast, the activity  
294 patterns of responsive neurons seemed variable across trials, although a few cells were reliably active (Fig. 6a  
295 bottom and 6b). To evaluate the trial-to-trial reliability of reconstructed images (or population responses), we  
296 used two measures, across-trial similarity and across-trial variability (see Methods). Across-trial similarity was  
297 defined as a Pearson's correlation between single-trial reconstructed images (or response patterns) and their  
298 trial-average (Fig. 6c). Across-trial variability was a normalized squared error between single-trial  
299 reconstructed image (or response patterns) and their trial-average (Fig. 6d, see Methods). For all planes, the

300 across-trial similarity of the reconstructed image pattern was high (0.85 [0.81–0.89], Fig. 6c left), whereas the  
301 across-trial similarity of the response was relatively low (0.40 [0.36–0.44], Fig. 6c right). Across-trial  
302 variability of the image was relatively low (Fig. 6d left), and that of the response pattern was relatively high  
303 (Fig. 6d right).

304 We next examined how the reconstructed images were reliably represented across trials. Based on the  
305 results of Fig. 5, neurons with partially overlapping or similar representation (reverse filters) will provide  
306 reliable representation across trials (for at least a part of the image), if these neurons are active on different  
307 trials. We demonstrate this using the example case (shown in Fig. 5). Among the nine overlapping cells, the  
308 three example neurons represented a partially similar pattern of the image (correlations of reverse filters  
309 among the three neurons were 0.31–0.68, Fig. 6e), while they were active on slightly different trials.  
310 Combining the nine overlapping cells resulted in the reliable representation of a local part of the image in most  
311 trials (Fig. 6e bottom). In the example case, the across-trial variability of a local part of the reconstructed  
312 image was gradually decreased as the number of cells used for the reconstruction increased (Fig. 6f). This  
313 tendency was also observed in data from all planes (Fig. 6g, black lines), suggesting that multiple overlapping  
314 cells support reliable image representation.

315 We further examined the relationship between reverse filter overlap or similarity and noise correlations  
316 (see Methods for a calculation, Supplementary Fig. 7a–c). Noise correlations were positively correlated with  
317 reverse filter correlations (correlation: 0.25, Supplementary fig. 7d) and also with signal correlations  
318 (correlation: 0.44, Supplementary fig. 7e)<sup>37, 39</sup>. However, noise correlations were tiny and mainly distributed  
319 near 0 even in cell pairs with high overlap or reverse filter similarity (e.g., in the pairs with correlation of  
320 reverse filter > 0.5, median noise correlation was 0.03. Supplementary fig. 7b and 7c). Furthermore, the  
321 maximal reverse filter similarity between a responsive cell and other overlapping cells was 0.57 [0.41–0.70]  
322 (Supplementary Fig. 6d), indicating that each responsive neuron often had at least one neuron with a similar  
323 reverse filter. Together, neurons with overlapping or similar reverse filters were almost independently active  
324 across trials, which was useful for reliable image representation.

325 We also analysed the effect of noise correlations on the reliable image representation across trials.  
326 Removing the noise correlations (see Methods) resulted in increases in the reconstructed performances and  
327 decreases in the across-trial variability (Supplementary fig. 7g–i), suggesting that the noise correlation is rather  
328 detrimental to both image reconstruction performances and the reliable image representation. In the  
329 relationship between the across-trial variability and the number of cells used for the reconstruction, the  
330 reduction of variability by removing the noise correlation was much smaller than that by increasing the cells  
331 used for the reconstruction (Fig. 6g), suggesting that noise correlation has a relatively small impact on the  
332 reliable representation.

333

### 334 **Representation of multiple natural images in a local population**

335 Finally, we examined how multiple natural images were represented in a population of responsive neurons  
336 (Fig. 7a–7d). Figs. 7b and 7c show data obtained from the example plane presented in the previous figures ( $n =$   
337 726 cells). Natural images were sorted by reconstruction performance (y-axis in Fig. 7b and c), and the cells  
338 responding to each image are plotted in each row. First, as the number of images increased, new responsive  
339 cells were added, and the total number of responsive cells used for the reconstructions quickly increased (right  
340 end of the plot on each row, Fig. 7b). At approximately 50 images, the number of newly added responsive cells  
341 quickly decreased, and the increase in the total number of responsive cells slowed, indicating that the newly  
342 added image was represented by a combination of the already plotted responsive cells (i.e., the neurons that  
343 responded to other images), due to the small overlap in responsive cells between images (Fig. 1j). These  
344 findings are summarized in Figs. 7c and 7d, in which the number of newly added cells quickly decreased to  
345 zero as the number of images increased (red lines in Fig. 7c and 7d for the representative case and for all  
346 planes, respectively). Therefore, although only ~5% of responsive neurons overlapped between images (Fig.  
347 1j), this small overlap was useful for representation of many natural images by a limited number of responsive  
348 neurons.

349 We also analysed whether features encoded by the responsive neurons can represent any natural image as

350 basis functions. If so, a set of features of the natural image will be accurately represented by a linear regression  
351 of the weights (i.e., features) of responsive cells in the cell-selection model independent of actual responses  
352 (see Methods, Fig. 7e). Fitting errors were computed in the image space. The median error was less than 10%  
353 for all images and all planes (3.3% [2.3–4.6%] for the example plane and 9.3% [5.4–18%],  $n = 24$  for the  
354 planes, Fig. 7f and 7g). Based on this result, the features encoded by responsive neurons in a local population  
355 can accurately represent the visual contents of natural images.

356

### 357 **Image representation in awake mice.**

358 The results demonstrated thus far were obtained from anaesthetized mice. We finally examined whether the  
359 results were generalized to awake mice. We performed an additional experiment with awake, passively  
360 viewing mice that expressed GCaMP6s in the cortical cells (a transgenic mouse or mice introduced with  
361 GCaMP via virus vector,  $N = 7$  planes from three mice)<sup>40, 41</sup>. We recorded eye positions and locomotion states  
362 (running and staying) during imaging and used data only when the eye was still (Fig. 8a–c, see Methods).

363 Results of main analyses obtained in the anaesthetized mice were also observed in the awake mice (Fig.  
364 8d–h, Supplementary Figs. 8 and 9). Most cells were visually responsive for at least one image, whereas only a  
365 small fraction of cells were responsive for each image (Supplementary Fig. 8a–c). The percentages of  
366 responsive cells were 82% [78–94%] across stimuli ( $p < 0.01$  by ANOVA), and 1.5% [1.4–2.7] cells were  
367 responsive for each image ( $p < 0.01$  by t-test and the evoked response  $> 10\%$ , Supplementary Fig. 8a and 8b). A  
368 single natural image was linearly decodable specifically from a small number of highly responsive cells for  
369 each image (Fig. 8d–h, Supplementary fig. 8d–i). Furthermore, reconstructed images were robust for cell drop  
370 (Supplementary fig. 8j and 8k) and reliable across trials (Supplementary Fig. 9). Therefore, the results  
371 obtained in anaesthetized mice were generalized at least to those in awake, passively viewing mice.

372 We also separately analysed the image reconstruction performance from excitatory and inhibitory cells. In  
373 some experiments, we used the mice that expressed tdTomato in inhibitory cells ( $gad2\text{-cre} \times Ai14$ )<sup>42, 43</sup> and  
374 identified excitatory and inhibitory cells based on the tdTomato ( $N = 5$  planes from two mice). Excitatory



375 cells were more visually responsive than inhibitory cells (Supplementary Fig. 10a–c).  
376 Furthermore, image reconstruction performances only by excitatory cells were comparable to  
377 those by all cells (Supplementary Fig. 10d and 10e). Therefore, excitatory cells mainly represent  
378 images at least under our experimental conditions.

379 We further examined how image reconstruction was affected by the locomotion state, which  
380 modulates V1 neuron activity<sup>44, 45</sup>. Although visual responses during running were higher than  
381 during staying (Supplementary Fig. 11a and 11b), the response patterns of a population of  
382 responsive cells were not largely different between the running and staying states  
383 (Supplementary fig. 11c). As a result, the reconstructed image patterns were not substantially  
384 affected by the locomotion states (Supplementary Fig. 11d and 11e).

385

## 386 **Discussion**

387 In mouse V1, a single natural image activated a small number of neurons which was sparser than that  
388 predicted by the linear model. The Gabor features represented by the individual neurons only slightly  
389 overlapped between neurons, indicating diverse representations. The visual contents of natural images were  
390 linearly decodable mainly from a small number of highly active neurons, and the additional use of weakly  
391 active neurons degraded the decoding. The representation by a small number of neurons was achieved by their  
392 diverse representations. The image was reliably represented across trials regardless of trial-to-trial response  
393 variability likely due to multiple neurons with partially overlapping representation. Further, neurons with  
394 overlapping representation were almost independently active across trials, which should be beneficial to the  
395 reliable image representation. These image representations were observed in both anaesthetized and awake  
396 mice. Furthermore, a small overlap of responsive neurons between the images helped a limited number of  
397 responsive neurons to represent multiple natural images. Finally, the visual features represented by all  
398 responsive neurons provided a good representation of the original visual features in the natural images.

399 Visual responses to natural images or movies in V1 are sparse at the single cell level (high lifetime

400 sparseness)<sup>2, 3, 5-9</sup> and at the population level (population sparseness)<sup>3, 5, 6, 14</sup>. Recently, recordings of local  
401 population activity using two-photon Ca<sup>2+</sup> imaging have enabled researchers to precisely evaluate the  
402 population sparseness<sup>5, 14, 46</sup>. We confirmed that a single natural image activated only a small number of  
403 neurons. According to the analysis of the encoding model, the visual responses of individual neurons were  
404 sparser than predicted from a linear model (Fig. 2f and 2g). Here, this sparse activity was shown to contain  
405 robust information to represent the natural image contents.

406 Image reconstruction is useful for evaluating the information content represented by neuronal activity and  
407 is widely used to analyse single unit activity in the LGN neurons<sup>15</sup> and fMRI data from several visual cortical  
408 areas<sup>16-19</sup> in response to natural scenes or movies. The former<sup>15</sup> study used “pseudo-population” data collected  
409 from several experiments, and the latter studies<sup>16-19</sup> used blood oxygen level-dependent (BOLD) signals that  
410 indirectly reflect the average local neuronal activity. However, it has not been examined whether and how the  
411 visual contents of natural images are represented in simultaneously recorded populations of single neurons in  
412 the cortex. It has also remained to be revealed how the information is optimally decoded from the  
413 representation; only a small number of highly active neurons mainly represent information, or the remaining  
414 neurons also have additional information. As shown in the present study, the visual contents of a single natural  
415 image were linearly decodable from a relatively small number of highly responsive neurons in a local  
416 population, and the additional use of the remaining neurons degraded the image reconstruction. Information  
417 has been proposed to be easily decoded from the sparse representation<sup>4</sup>. Indeed, the sparse population activity  
418 increases the discriminability of two natural scenes by rendering the representations of the two scenes  
419 separable<sup>5</sup>. Our results extend this finding by showing that information about visual contents represented in  
420 sparsely active neurons is linearly accessible, suggesting that downstream areas easily and optimally decode  
421 images by collecting activity of highly responsive neurons in the sparse representation of V1.

422 The visual features encoded by individual neurons should be diverse to ensure that a small number of  
423 active neurons represent the complex visual features of the image. Although RF structures in the local  
424 population of mouse V1 have already been reported<sup>21, 22, 33, 34</sup>, their diversity has not been analysed with

425 respect to natural image representation. In the present study, the visual features represented by sparsely active  
426 neurons were sufficiently diverse to represent the visual contents of natural images (Fig. 7e–g). Computational  
427 models for natural image representation have suggested that sparse activity and the number of available  
428 neurons affect the diversity of RF structures<sup>20, 47–49</sup>.

429       Additionally, sparsely active neurons reliably represented an image across trials, regardless of trial-to-trial  
430 response variability. Although a computational model proposed sparse and overcomplete representation as the  
431 optimal representation of natural images by unreliable neurons<sup>20</sup>, this model has never been investigated  
432 experimentally. The reliable representation was mainly achieved by the diverse, partially overlapping  
433 representations, consistent with the overcomplete representation. Subregions of RFs of some V1 neurons  
434 partially overlap<sup>21</sup>. Based on our results, this overlap may be useful for reliable image representation.  
435 Furthermore, the reliable representation was also likely to be helped by neurons with similar reverse filters that  
436 were almost independently active across trials. Our results suggest a new representation scheme in which  
437 information is reliably represented while the representing neuronal patterns change across trials. This model  
438 seems to be similar to “drop-out” in deep learning<sup>50</sup> and may be useful for avoiding overfitting and local  
439 minimum problems in learning.

440       Our analysis also revealed how multiple natural images were represented in a local population of  
441 responsive neurons. A single natural image activated specific subsets of neurons, whereas most neurons in a  
442 local population responded to at least one of the images, supporting the sparse, distributed code proposed in a  
443 previous study. Only 5.4% of responsive neurons overlapped between images (Fig. 1i). However, due to this  
444 small overlap, many natural images were represented by a limited number of responsive neurons (Fig. 7a–d).  
445 Furthermore, the features of all responsive neurons in a local population were sufficient to represent all the  
446 natural images used in the present study (Fig. 7e–g). Based on these findings, any natural image could be  
447 represented by a combination of responsive neurons in a local population. These findings also suggest that  
448 representation of multiple natural images is high dimensional, which is consistent with a recent report about  
449 high-dimensional representation in mouse V1<sup>51</sup>. Thus, a single natural image can be low-dimensionally

450 represented in a high dimensional representation space for a large number of natural scenes.

451 In summary, this work highlighted how the visual contents of natural images are robustly represented in  
452 sparsely active V1 neurons. The diverse but partially overlapping representation helps the small number of  
453 neurons to robustly represent a complex image, regardless of across-trial variability. We propose a new  
454 representation scheme in which information is reliably represented with variable neuronal patterns across trials  
455 that may be effective in avoiding overfitting in learning, and that using the activity of only a small number of  
456 highly responsive cells is an optimal decoding strategy for the sparse representation.

457

## 458 **Methods**

459 All experimental procedures were approved by the local Animal Use and Care Committee of Kyushu  
460 University and the University of Tokyo.

461

### 462 **Animal preparation for two-photon imaging in anaesthetized mice**

463 C57BL/6 mice (male and female) were used (Japan SLC Inc., Shizuoka, Japan). Mice were anaesthetized with  
464 isoflurane (5% for induction, 1.5% for maintenance during surgery, ~0.5% during imaging with a sedation of <  
465 0.5mg/kg chlorprothixene, Sigma-Aldrich, St. Louis, MO, USA). The skin was removed from the head, and  
466 the skull over the cortex was exposed. A custom-made metal plate for head fixation was attached with dental  
467 cement (Super Bond, Sun Medical, Shiga, Japan), and a craniotomy (~3mm in diameter) was performed over  
468 the primary visual cortex (centre position: 0–1 mm anterior to lambda, +2.5–3mm lateral to the midline). A  
469 mixture of 0.8 mM Oregon Green BAPTA1-AM (OGB1, Life Technologies, Grand Island, NY, USA)  
470 dissolved in 10% Pluronic (Life Technologies) and 0.025 mM sulforhodamine 101<sup>52</sup> (SR101, Sigma-Aldrich)  
471 was pressure-injected with a Picospritzer III (Parker Hannifin, Cleveland, OH, USA) at a depth of 300–500  
472 µm from the brain surface. The cranial window was sealed with a coverslip and dental cement. The imaging  
473 experiment began at least one hour after the OGB1 injection.

474

## 475 **Animal preparation for two-photon imaging in awake mice**

476 In awake mouse experiments, we used two lines of transgenic mice: Thy1-GCaMP6s (GP4.3) transgenic  
477 mouse<sup>41</sup> (JAX #024275, n = 1 mouse, 2 imaging planes) and the mice obtained by crossing gad2-ires-cre  
478 mice<sup>43</sup> (JAX #010802) with Ai14 mice<sup>42</sup> (JAX #007914) (Gad2-Ai14, n = 2 mice, 5 imaging planes).  
479 Thy1-GCaMP6s mice express GCaMP6s<sup>40</sup> in cortical neurons. Gad2-Ai14 mice express tdTomato in almost  
480 all inhibitory neurons<sup>43</sup>.

481 GCaMP6s was introduced into Gad2-Ai14 mice via an adenoassociated virus (AAV). The Gad2-Ai14  
482 mice were anaesthetized with isoflurane as described above. A small incision was made on a sculp, and a small  
483 hole (< 0.3 mm diameter) was made in the skull over V1. AAV2/1-syn-GCaMP6s<sup>40</sup> (vector core; University of  
484 Pennsylvania, Philadelphia, PA, USA) was injected into V1 through the hole (titer:  $3.0\text{--}5.0 \times 10^{12}$  genomes/ml,  
485 volume: 500 nl, depth: 250-300 micron from a brain surface). After suturing the incision, the Gad2-Ai14 mice  
486 were recovered at least three days after the injection. The mice were anaesthetized with isoflurane to attach a  
487 metal plate for head fixation and to make a cranial window as described above. The mice were recovered after  
488 the surgery.

489 The mice were daily habituated with a head fixation on a disc type treadmill. Duration of the head  
490 fixation started with a few minutes and gradually prolonged up to ~two hours over several days. If mice were  
491 calmly head-fixed for two hours without any stressful sign, imaging experiments started on the next day. The  
492 imaging started at least one week after the cranial window surgery, and three weeks after the virus injection for  
493 the gad2-Ai14 mice.

494

## 495 **Two-photon Ca<sup>2+</sup> imaging**

496 Imaging was performed with a two-photon microscope (A1R MP, Nikon, Tokyo, Japan) equipped with a 25×  
497 objective (NA 1.10, PlanApo, Nikon) and Ti:sapphire mode-locked laser (MaiTai Deep See, Spectra Physics,  
498 Santa Clara, CA, USA)<sup>53,54</sup>. OGB1, SR101, GCaMP6s, and tdTomato were excited at a wavelength of 920 nm.  
499 Emission filters with a passband of 525/50nm were used for the OGB1 and GCaMP6s signals, and filters with

500 a passband of 629/56nm for the SR101 and tdTomato signals. The fields of view (FOVs) were  $338 \times 338 \mu\text{m}$   
501 ( $10$  planes from  $7$  anaesthetized mice) and  $507 \times 507 \mu\text{m}$  ( $14$  planes from  $7$  anaesthetized mice and  $7$  planes  
502 from  $3$  awake mice) at  $512 \times 512$  pixels. The sampling frame rate was  $30\text{Hz}$  using a resonant scanner.

503

#### 504 **Monitoring of eye position and treadmill motion in awake mice**

505 In awake mice experiments, right eye images and rotation of the disc type treadmill were recorded during the  
506 imaging. The right eye was monitored with a USB camera (NET New Electronic Technology GmbH,  
507 Germany). The treadmill rotation was monitored with a rotary encoder (OMRON, Japan). The eye images, the  
508 encoder signals and time stamps of frame acquisition of the two-photon imaging were simultaneously recorded  
509 using a custom-written program in LabView (National Instruments, Austin, TX, USA).

510

#### 511 **Visual stimulation**

512 Before beginning the recording session, the retinotopic position of the recorded FOV was determined using  
513 moving grating patches (lateral or upper directions,  $99.9\%$  contrast,  $0.04$  cycle/degrees,  $2\text{Hz}$  temporal  
514 frequency,  $20$  and  $50$  degrees in diameter) while monitoring the changes in signals over the entire FOV. The  
515 lateral or upper motion directions of the grating were used to activate many cells because the preferred  
516 directions of mouse V1 neurons are slightly biased towards the cardinal directions<sup>54,55</sup>. First, the grating patch  
517 of  $50$  degrees in diameter was presented in one of  $15$  ( $5 \times 3$ ) positions that covered the entire monitor to  
518 roughly determine the retinotopic position. Then, the patch of  $20$  degrees in diameter was presented on the  $16$   
519 ( $4 \times 4$ ) positions covering an  $80 \times 80$ -degree space to finely identify the retinotopic position. The stimulus  
520 position that induced the maximum visual response of the entire FOV was set as the centre of the retinotopic  
521 position of the FOV.

522 A set of circular patches of greyscale, contrast-enhanced natural images ( $200$  image types in main  
523 datasets, dataset 1) was used as the visual stimuli for predicting the response and reconstructing the natural  
524 image ( $256$  intensity level,  $60$  degrees in diameter,  $512 \times 512$  pixels, with a circular edge ( $5$  degrees) that was

525 gradually mixed to a grey background). Each natural image was adjusted to approximately full contrast  
526 (99.9%). The mean intensity across pixels in each image was adjusted to approximately 50%. Original natural  
527 images were obtained from the van Hateren Natural Image Dataset  
528 (<http://pirsquared.org/research/#van-hateren-database>)<sup>56</sup> and the McGill Calibrated Colour Image Database  
529 (<http://tabby.vision.mcgill.ca/html/welcome.html>)<sup>57</sup>. Square image patches (512 × 512 pixels) were obtained  
530 from around centres of the original images. Some original images were down-sampled before the extraction of  
531 the centre parts. We selected 200 images that had spatial structure for the final stimulus set and did not include  
532 images that had less spatial structure (e.g., almost flat image) and very high spatial frequency  
533 components throughout the image (e.g., fine texture) by visual inspection. The pixel-to-pixel  
534 correlation between images was 0.003 [-0.12–0.11] (median [25–75<sup>th</sup> percentile], n = 200 images).

535 During image presentation, one image type was consecutively flashed three times (three 200-ms  
536 presentations interleaved with 200 ms of grey screen), and the presentation of the next image was initiated  
537 after the presentation of the grey screen for 200 ms. Images were presented in a pseudo-random sequence in  
538 which each image was presented once every 200 image types. Each image was presented at least 12 times (i.e.,  
539 12 trials) for anesthetized and ~40 times for awake mice in a total recording session. We did not set a long  
540 interval between image flashes to reduce the total recording time and increase the number of repetitions. In  
541 this design, the tail of the Ca<sup>2+</sup> response to one image invaded the time window of the next image presentation  
542 (Fig. 1b). Although this overlap may have affected the visual responses to two adjacent images, many trial  
543 repetitions in the pseudo-random order and the sparse responses to natural images (Fig. 1) minimized the  
544 effects of response contamination between two consecutive images.

545 In another set of experiments with anaesthetized mice, we used different image sets (1000–2000 images  
546 that did not contain the 200 images described above, n = 4 planes from three mice). The original images for  
547 these image sets were obtained from the image datasets described above and from the Caltech 101 dataset  
548 ([http://www.vision.caltech.edu/Image\\_Datasets/Caltech101/](http://www.vision.caltech.edu/Image_Datasets/Caltech101/))<sup>58</sup> and the web site for free image  
549 (<https://www.pakutaso.com/>). In experiments using these image sets, each image was presented 3–8 times.

550 Moving square gratings (8 directions, 0.04 cycles/degree, 2 Hz temporal frequency, 60-degree patch  
551 diameter) were presented at the same position as the natural image on the screen. Each direction was presented  
552 for 4 sec interleaved by 4 sec of the grey screen. The sequence of directions was pseudo-randomized, and each  
553 direction was presented 10 times for anaesthetized and 20 times for awake mice in a recording session.

554 All stimuli were presented with PsychoPy<sup>59</sup> on a 32-inch, gamma-corrected LCD monitor (Samsung,  
555 Hwaseong, South Korea) with a 60-Hz refresh rate, and the timing of the stimulus presentation was  
556 synchronized with the timing of image acquisition using a transistor-transistor logic (TTL) pulse counter  
557 (USB-6501, National Instruments).

558 The entire recording session for one plane was divided into several recording sessions (4–6  
559 trials/sub-session and 15–25 minutes for each session). Each recording session was interleaved by  
560 approximately 5–10 minutes of rest time, during which the slight drift of the FOV was manually corrected. In  
561 anaesthetized mice, the retinotopic position of the FOV was confirmed with the grating patch stimuli during  
562 the rest time every two or three sessions, and the recording was terminated if the retinotopic position had  
563 shifted (probably due to eye movement). The recordings were performed in one to three planes of different  
564 depths and/or positions in each anaesthetized mouse ( $1.7 \pm 0.8$  planes, mean  $\pm$  standard deviation). In awake  
565 mice, the recording continued independent of the eye position and terminated if the mouse showed any  
566 stressful sign. The recording was performed in one plane per day, and one or two planes were obtained from  
567 each awake mouse.

568 For the analyses described below, natural images were scaled such that the maximum (255) and minimum  
569 (0) intensities were 1 and -1, respectively, and the grey intensity (127) was 0. A square ( $43 \times 43$  degrees)  
570 positioned in the centre of the natural image patch was extracted and down-sampled to a  $32 \times 32$ -pixel image.  
571 The down-sampled image was used to analyse the Gabor features, response prediction and image  
572 reconstruction.

573

574 **Analysis of eye positions and treadmill rotations**



575 Each eye image in awake mice was binarized based on pixel intensities. The contour of the binarized pupil  
576 area was fitted with an ellipse whose centre was used as the eye position (Supplementary Fig. 7b). The eye  
577 positions on the image were transformed to angular positions. In the transformation, a previously reported  
578 value was used for the radius of the mouse eye<sup>60</sup>. In a distribution of the eye position during a total imaging  
579 session, a peak position was manually selected. Only the time points at which the eye was within 3.5 degrees  
580 (or ~70 microns on the image) around the peak position were used for all analyses described below (except for  
581 the time course extraction of Ca signal from the two-photon imaging data).

582 In the analysis of the treadmill rotation, position signals from the rotary encoder on the treadmill were  
583 transformed to velocity and smoothed with the Savitzky–Golay filter. Running periods were defined as periods  
584 during which the velocity was greater than 2 cm/sec.

585

#### 586 **Analysis of two photon imaging data**

587 All data analysis procedures were performed using MATLAB (Mathworks, Natick, MA, USA). The recorded  
588 images were phase-corrected and aligned between frames. The average image across frames was used to  
589 determine the region of interest (ROIs) of individual cells. After removing the slow SF component (obtained  
590 with a Gaussian filter with a sigma of approximately five times the soma diameter), the frame-averaged image  
591 was subjected to a template matching method in which the two-dimensional, difference of Gaussians (sigma1:  
592  $0.26 \times$  soma diameter that was adjusted for zero-crossing at the soma radius, sigma2: soma diameter) was used  
593 as a template for the cell body. Highly correlated areas between the frame-averaged image and the template  
594 were detected as ROIs for individual cells. ROIs were manually corrected via a visual inspection.  
595 SR101-positive cells (putative astrocytes<sup>52</sup>) were removed from the ROI in data of anaesthetized mice. For  
596 data of awake mice, a cross-correlation image<sup>21</sup> and a max-projection image across frames were also used for  
597 the ROI detection.

598 The time course of the calcium signal in each cell was computed as an average of all pixels within an ROI.  
599 Signal contamination from an out-of-focus plane was removed using a previously reported method<sup>54, 61</sup>. Briefly,

600 a signal from a ring-shaped area surrounding each ROI was multiplied by a factor (contamination ratio) and  
601 subtracted from the signal of each cell. In anaesthetized mice, the contamination ratio was determined to  
602 minimize the difference between the signals from a blood vessel and the surrounding ring-shaped region  
603 multiplied by the contamination ratio. The contamination ratios were computed for several blood vessels in the  
604 FOV, and the mean value for several blood vessels was used for all cells in the FOV. In awake mice, the  
605 contamination ratio was set to 0.7 for all cells following a previous study<sup>40</sup>, because it was difficult to identify  
606 the blood vessels in the GCaMP imaging.

607 After removing the out-of-focus signal, slow temporal frequency components ( $> 60$  sec/cycle) were  
608 removed from the time course of each cell (a Gaussian low-cut filter applied on the frequency domain for  
609 anaesthetized data or a median low-cut filter for awake data), followed by smoothing with the Savitzky–Golay  
610 filter (4th order, 15 frame points length (~500 ms)). Then, the filtered time course ( $F_{\text{filtered}}$ ) was transformed to  
611 ratio change ( $dF/F$ ) by using the 20th percentile value across frames ( $F$ ) ( $dF/F = (F_{\text{filtered}} - F)/F$ ).  
612 Frame-averaged activity ( $dF/F$ ) during 200 ms baseline (6 frames immediately before the stimulus) and during  
613 stimulus (average of the last 200 ms for each stimulus period) were used for subsequent analyses. The evoked  
614 response was obtained by subtracting the activity during baseline from that during stimulus. In awake mice,  
615 only data for images that contained at least six trials were used for subsequent analyses.

616

### 617 **Analysis of visual responses**

618 Visually responsive neurons were determined by a one-way ANOVA ( $p < 0.01$ ) with a dataset of  $N$  stimuli and  
619 one baseline (mean across stimuli) activity in each trial (size:  $N+1$  activity  $\times$  no. of trials,  $N$ : the number of  
620 stimuli used for the analysis). To validate this criterion, the ANOVA was applied to a randomized dataset in  
621 which data labels were shuffled in each trial. The false positive rate was only a small fraction of the percentage  
622 of the responsive cells (Anaesthetized: 85% responsive cells and 1.0% false positive rate. Awake: 82%  
623 responsive cells and 1.8% false positive rate).

624 For each responsive neuron identified by the ANOVA, responsiveness for each image was determined by

625 using a t-test ( $p < 0.01$ , comparison of activity between stimulus and baseline) and a trial-averaged evoked  
626 response ( $> 10\%$ ). The evoked response threshold was used to reduce the false positive rate (Supplementary  
627 Fig. 1). The false positive rate was determined with the label-shuffled data. Without the evoked response  
628 threshold, the false positive rate was relatively high compared to the percentage of responsive cells per image  
629 (Anaesthetized: 3.2% for observed and 0.4% for shuffled data. Awake: 1.8% for observed and 0.3% for  
630 shuffled data). With the 10% amplitude threshold, the false positive rate decreased (Anaesthetized: 2.5% for  
631 observed and 0.1% for shuffled data. Awake: 1.5% for observed and 0.1% for shuffled data, Supplementary  
632 Fig. 1). Thus, we used the 10% evoked response threshold. We called the significant responses highly  
633 responsive. For the dataset with 1000–2000 stimulus images (dataset 2), responsive cells were not determined  
634 because of fewer trials.

635 The population sparseness ( $s$ ) was computed using the equation described in previous studies<sup>2, 3, 62</sup> as  
636 follows:  $s = [1 - (\sum Ri)^2 / (N_{\text{cell}} \sum Ri^2)] / (1 - 1/N_{\text{cell}})$ , where  $Ri$  is the evoked response of the  $i$ th cell, and  
637  $N_{\text{cell}}$  is the number of cells ( $i = 1, \dots, N_{\text{cell}}$ ). Z-scored evoked responses were used in the following analyses  
638 including response prediction and image reconstruction (z-score was computed with responses across stimuli  
639 and trials in each cell).

640

### 641 **Gabor features**

642 A set of spatially overlapping Gabor filter wavelets ( $n = 1248$  filters) that has an almost self-inverting feature  
643 was prepared to extract the visual features of the natural images<sup>10, 63, 64</sup>. The down-sampled images were first  
644 subjected to the set of Gabor filters to obtain Gabor feature values. A single feature value corresponds to a  
645 single wavelet filter.

646 Gabor filters have four orientations (0, 45, 90, and 135 degrees), two phases, and 4 sizes ( $8 \times 8$ ,  $16 \times 16$ ,  
647  $32 \times 32$ , and  $64 \times 64$  pixels) located on  $11 \times 11$ ,  $5 \times 5$ ,  $3 \times 3$ , and  $1 \times 1$  grids (Fig. 2a and b). Therefore, the  
648 three smaller scale filters spatially overlapped with each other. The spatial frequencies of the four scale sizes  
649 of the Gabor wavelets were 0.02, 0.04, 0.09, and 0.18 cycle/degrees (cpd).

650 The Gabor filter set was almost self-inverting<sup>63</sup>, i.e., the feature values obtained by applying an image to  
651 the wavelet set were transformed to the image by summing the filters after multiplying by the feature values.

$$\mathbf{F} = \mathbf{G}_{\text{fwd}} * \mathbf{I} \quad (1)$$

$$\mathbf{I}' = \mathbf{G}_{\text{rev}} * \mathbf{F} \quad (2)$$

652 In equation 1 (eq. 1)  $\mathbf{F}$  is the feature value matrix (matrix size:  $f \times s$ .  $f$ : the number of features, 1248.  $s$ : the  
653 number of images),  $\mathbf{G}_{\text{fwd}}$  is the Gabor filter matrix that transforms images to feature values and in which each  
654 row contains reshaped 2D-Gabor filters ( $f \times p$ .  $p$ : the number of the image pixels, 1024), and  $\mathbf{I}$  is the  
655 down-sampled stimulus image matrix ( $p \times s$ ). In eq. 2,  $\mathbf{I}'$  is the reconstructed image matrix ( $p \times s$ ) from  $\mathbf{F}$ ,  
656  $\mathbf{G}_{\text{rev}}$  is the Gabor filter matrix that transforms the features to images ( $p \times f$ ). In an ideal situation,  $\mathbf{G}_{\text{fwd}}^{-1}$  equals  
657  $\mathbf{G}_{\text{fwd}}^T$  (i.e.,  $\mathbf{G}_{\text{rev}} = \mathbf{G}_{\text{fwd}}^T$ .  $A^{-1}$  and  $A^T$  are inverse and transposed matrices of  $A$ , respectively.), resulting in that  $\mathbf{I}'$   
658 equals  $\mathbf{I}^{63}$ . However, our Gabor transformation was not perfect; the pixel-to-pixel correlation between  $\mathbf{I}$  and  $\mathbf{I}'$   
659 was  $0.93 \pm 0.026$  (mean  $\pm$  standard deviation,  $n = 200$  images). To minimize the effect of this information loss  
660 on evaluations of image reconstruction performance (see below), we used  $\mathbf{I}'$  instead of  $\mathbf{I}$  as target images for  
661 the evaluation of image reconstruction. The  $\mathbf{G}_{\text{rev}}$  in eq. 2 was different from  $\mathbf{G}_{\text{fwd}}^T$  in eq. 1 in terms of a scaling  
662 and bias;  $\mathbf{G}_{\text{rev}} = \alpha \times \mathbf{G}_{\text{fwd}}^T + \beta$  ( $\alpha$ : scaling factor,  $\beta$ : bias.  $\alpha$  and  $\beta$  were computed to minimize the sum of mean  
663 squared error between  $\mathbf{I}'$  and  $\mathbf{I}$ ). The Gabor filters and the transformations were based on an open source  
664 program (originally written by Dr. Daisuke Kato and Dr. Izumi Ohzawa, Osaka University, Japan,  
665 [https://visiome.neuroinf.jp/modules/xoonips/detail.php?item\\_id=6894](https://visiome.neuroinf.jp/modules/xoonips/detail.php?item_id=6894)).

666

### 667 **Encoding model (response prediction model)**

668 In the encoding model, single cell responses ( $\mathbf{R}^k = [R_{ki}]$ ,  $k$ : cell number,  $i$ : trial number across stimuli and  
669 trials. Size:  $1 \times N_{\text{trial}}$ : the number of trials across stimuli and trials) were predicted using a linear regression  
670 analysis of selected Gabor feature values ( $\mathbf{F}_{\text{select}} = [F_{ji}]$ ,  $j$ : selected Gabor feature number. Size:  $f_{\text{select}} \times N_{\text{trial}}$ .  
671  $f_{\text{select}}$ : the number of selected features. Fig. 2a–c and Supplementary Fig. 2a and 2b).

$$\mathbf{R}^k = \text{NL}(\mathbf{W}^k * \mathbf{F}_{\text{select}} + b^k) \quad (3)$$

672 where  $\mathbf{W}^k$  ( $= [W_{kj}]$ . Size:  $1 \times f_{\text{select}}$ ) is the weight vector,  $\mathbf{F}_{\text{select}}$  ( $f_{\text{select}} \times N_{\text{trial}}$ ) is the matrix of selected feature

673 values,  $b^k$  (Size:  $1 \times 1$ ) is bias, and  $NL(\cdot)$  is the non-linear scaling function. The encoding model was created  
674 independently for each cell. The features used in the regression were determined as follows. First, Pearson's  
675 correlation coefficients between the response and feature values were computed in each feature. Then, using  
676 one of the preset values for the correlation coefficient as a threshold (13 points ranging from 0.05 to 0.35,  
677 Supplementary Fig. 2a and 2b), only the more strongly correlated features were selected (feature selection) and  
678 used in the regression analysis.  $\mathbf{W}^k$  and  $b^k$  were estimated to minimize the loss function:  $\sum (\mathbf{R}^k -$   
679  $(\mathbf{W}^k * \mathbf{F}_{\text{select}} + b^k))^2 + \lambda \sum \mathbf{W}^{k2}$  ( $\lambda$ : regularization parameter). This was solved by using Bayesian linear  
680 regression with an expectation-maximization algorithm that is approximately equivalent to linear regression  
681 with L2 regularization<sup>65</sup>. After the regression analysis, the non-linearity of the predicted response was adjusted  
682 with a rectification step using the following function<sup>34</sup>,  $NL(x)$ :  $NL(x) = A/[1 + \exp(Bx + C)] + D$ , where A,  
683 B, C and D are parameters to be estimated using a built-in Matlab function (*lsqnonlin*). This step merely scaled  
684 the regression output without changing the regression parameters ( $\mathbf{W}^k$  and  $b^k$ ).

685 The response prediction performance of the model was estimated by 10-fold cross-validations (CVs) in  
686 which the response data for 90% images were used to estimate the parameters, and the remaining data for 10%  
687 images were used to evaluate the prediction (Thus,  $\mathbf{W}^k$  and  $b^k$  were estimated and fixed in each CV). In the  
688 10-fold CVs, all images were used once as test data. The prediction performances were estimated using  
689 Pearson's correlation coefficients between the observed (trial-average) and predicted responses. Encoding  
690 models were created for all preset threshold values for feature selection, and the model that exhibited the best  
691 prediction performance was selected as the final model.

692 In the analysis of overlapping weights (i.e., feature) between two cells, the percentage of overlapping  
693 weights relative to the number of non-zero weights was computed for each cell and averaged between the two  
694 cells in the pair.

695 Using the same dataset as used in the encoding model, the RF structure was estimated for each cell using  
696 a regularized inverse method<sup>32-34</sup> that employs one hyper-parameter (regularized parameter). In the 10-fold  
697 CVs, the RF structure was estimated with the training dataset using one of the preset regularized parameters

698 (13 logarithmically spaced points between  $10^{-3}$  and  $10^3$ ). The visual response was predicted using the  
699 estimated RF and test dataset. The prediction performance of visual response was estimated by determining  
700 Pearson's correlation coefficients between the observed and the predicted responses. RFs were estimated for  
701 all values of the preset regularized parameters, and the value that resulted in the best predicted response was  
702 selected for the final RF model.

703

#### 704 **Image reconstruction**

705 For image reconstruction, feature values obtained from each Gabor filter were linearly regressed by the  
706 single-trial activity of multiple cells. For each Gabor feature,

$$\mathbf{F}^j = \mathbf{H}^j * \mathbf{R} + c^j \quad (4)$$

707 where  $\mathbf{F}^j (= [F_{ji}])$  is the feature values for  $j$ th Gabor filter ( $j$ : Gabor feature number,  $i$ : trial number across  
708 stimuli and trials. Size:  $1 \times N_{\text{trial}}$ .  $N_{\text{trial}}$ : the number of trials across stimuli and trials),  $\mathbf{H}^j (= [H_{jk}])$ . Size:  $1 \times$   
709  $N_{\text{cell}}$ .  $N_{\text{cell}}$ : the number of cells) is the weights,  $\mathbf{R} (= [R_{ki}])$ .  $k$ : cell number. Size:  $N_{\text{cell}} \times N_{\text{trial}}$ . is the response  
710 matrix. In the 10-fold CVs, the weights,  $\mathbf{H}^j$  and a bias,  $c^j$  were estimated to minimize the loss function:  
711  $\sum (\mathbf{F}^j - (\mathbf{H}^j * \mathbf{R} + c^j))^2 + \lambda \sum \mathbf{H}^j{}^2$ , which was solved by using Bayesian linear regression with an  
712 expectation-maximization algorithm with the training dataset. Then, each Gabor feature value ( $\hat{\mathbf{F}}^j$ ) was  
713 reconstructed from the visual responses in the test dataset (10-fold CV with the same data split to that in the  
714 encoding model.  $\mathbf{H}^j$  and  $c^j$  were estimated and fixed in each CV). After each Gabor feature was independently  
715 reconstructed, sets of reconstructed feature values ( $\hat{\mathbf{F}} = [\hat{\mathbf{F}}^1; \dots; \hat{\mathbf{F}}^{1248}]$ . Size:  $f \times N_{\text{trial}}$ ) were transformed into  
716 images using eq. 2.

717 In the all-cell model, each feature was reconstructed using all cells (Fig. 3a, left panel). In the  
718 cell-selection model, each feature was reconstructed using a subset of cells. For each feature reconstruction,  
719 cells were selected using the encoding model; if a cell was represented by  $j$ th feature in the encoding model  
720 (i.e., non-zero weight in  $j$ th feature in the eq. 3), the cell was selected for the  $j$ th feature reconstruction (Fig. 3a,  
721 right). In other words, each cell participated in the reconstruction of features that the cell encoded. When none

722 of the cells were selected for feature reconstruction, the feature value was set to 0.

723 Reconstruction performance was evaluated using pixel-to-pixel Pearson's correlation coefficients (R) and  
724 coefficients of determination (CD) between the stimulus and reconstructed images. CD was computed using  
725 the following equation:  $CD = 1 - \frac{\sum(I' - \hat{I})^2}{\sum(I' - I'_{\text{mean}})^2}$  ( $\hat{I}$ : the reconstructed image by the model,  $I'$ :  
726 stimulus image obtained by the transformation and reconstruction of Gabor filters (eq. 2),  $I'_{\text{mean}}$ : mean pixel  
727 intensity of  $I'$ ). R indicates similarity of image pattern between  $\hat{I}$  and  $I'$ , and CD indicates goodness of  
728 model prediction reflecting differences in pixel intensities between  $\hat{I}$  and  $I'$ .

729 The cell-selection described above (i.e., feature selection in the encoding model) should overestimate the  
730 reconstruction performance, because the test dataset was used for both the cell-selection and the performance  
731 evaluation of the reconstruction model. To precisely evaluate the performance of the cell-selection model, we  
732 used nested CV for the cell-selection; a dataset was separated into 10% test, 9% validation, and 81% training  
733 sets, and the cell-selection was performed with the validation and training sets. Then, the performance of the  
734 reconstruction model that was trained with both the validation and training sets was evaluated using the test  
735 dataset. The performance of the reconstruction model with nested CV was similar to that of the model without  
736 nested CV (Supplementary Fig. 4).

737 In the analysis of the overlapping weights (i.e., feature) between cells, the percentage of overlapping  
738 weights relative to the number of non-zero weights was computed for each cell and averaged between the two  
739 cells in the pair.

740 We independently obtained the weights of the image reconstruction model ( $\mathbf{H} = [\mathbf{H}^1; \dots; \mathbf{H}^{1248}]$ , size:  $f$   
741  $\times N_{\text{cell}}$ ), the weights of encoding model ( $\mathbf{W} = [\mathbf{W}^1; \dots; \mathbf{W}^{N_{\text{cell}}}]^T$ , size:  $f \times N_{\text{cell}}$ ) and RF by the pseudoinverse  
742 method. We chose the scheme of the image reconstruction model to optimally reconstruct the image by a  
743 population of neurons. In the image reconstruction model,  $\mathbf{H}$  was estimated to directly optimize the image  
744 reconstruction considering the responses of multiple cells. By contrast, in the encoding model (or RF  
745 estimation), weights were estimated independently in each cell without considering the other cells' responses.  
746 Because  $\mathbf{H}$  was likely to be more optimized to represent images with multiple cells than  $\mathbf{W}$  or RF, we chose

747 the model scheme for the image reconstruction.

748

#### 749 **Relationship between the image reconstruction and the number of features that each neuron encoded**

750 In the analysis in Supplementary Figs. 5a–c, the cell-selection model was used for the image reconstruction. In  
751 the cell-selection model, each neuron participated in the reconstructions of a small number of features that  
752 were strongly correlated with the neuron’s responses. In the cell-selection model shown in Fig. 3 (original  
753 model), the threshold for the correlation coefficient was selected based on the encoding model for each neuron  
754 (Fig. 3a, right panel). In each neuron, the threshold of correlation coefficient was adjusted to increase (or  
755 decrease) the number of features for which each neuron participated in their reconstruction (0.1–20 fold  
756 change in the number of features per neuron relative to the original model, Supplementary Fig. 5a–c). In each  
757 fold change, the reconstruction model was trained with training data (i.e., weights and bias parameters were  
758 estimated in each fold change of the number of features), and the performance was estimated with test data  
759 using the 10-fold CV as described above.

760

#### 761 **Image reconstruction from a small number of cells**

762 In the analyses shown in Figs. 4a–4h and 5a–5b, cells in each image were separated into responsive and  
763 remaining cells and sorted by their response amplitude in descending order (i.e., from highest to lowest  
764 response amplitude). Then, the cells were selected first from the responsive cells and then from the remaining  
765 cells for the addition (Fig. 4a–h) or dropping (Fig. 5a–b). The analyses only used data for images including at  
766 least 10 responsive cells in Fig. 4a–h and at least 5 responsive cells in Fig. 5a–d.

767 In the image reconstruction from a subset of cells for each image (Fig. 4, 5 and 6), the weights of the  
768 cell-selection model ( $\mathbf{H} = [\mathbf{H}^1; \dots; \mathbf{H}^{1248}]$ ,  $f \times N_{\text{cell}}$ ) were scaled because  $\mathbf{H}$  was estimated by the more cells  
769 than the cells used during the cell addition or dropping.

$$\mathbf{F}' = \mathbf{a}' \times (\mathbf{H} * \mathbf{R}') + \mathbf{c} \quad (5)$$

770 where  $\mathbf{F}'$  ( $f \times N_{\text{trial}}$ ) is the matrix of all reconstructed feature values,  $\mathbf{H}$  and  $\mathbf{c}$  ( $\mathbf{c} = [c^1; \dots; c^{1248}]$ ,  $f \times 1$ ) are



771 the weight and bias matrices of the cell-selection model in eq. 4,  $\mathbf{R}'$  is a response matrix that includes a subset  
772 of cells used for each image reconstruction (i.e., the responses of non-selected cells were set to 0), and  $\mathbf{a}'$  is a  
773 free parameters that is obtained to minimize the sum of squared error between the original and reconstructed  
774 feature values across all features and stimuli of the training dataset in each CV:  $\sum(\mathbf{F}' - \mathbf{F})^2$ , ( $\mathbf{F}$ : a matrix of  
775 features of regression target). Because  $\mathbf{a}'$  is common across all features, this scaling did not change the  
776 weight pattern of the cell-selection model. Then, images were reconstructed from  $\mathbf{F}'$  using eq. 2 as described  
777 above. In the reconstruction from a subset of cells (Fig.4, 5, and 6),  $\mathbf{a}'$  (i.e., weights,  $\mathbf{a}' \times \mathbf{H}$ ) was estimated  
778 independently for each subset of cells, and a different set of cells was used for each image.

779

#### 780 **Robustness of image reconstruction against cell drop**

781 In the analysis of robustness (Fig. 5c–5f), a representation area of each cell was determined using the z-scored  
782 reverse filter (sum of weights  $\times$  Gabor filters). The representation area was defined as a cluster of pixels whose  
783 absolute z-scores were greater than 1.5 and whose contours were smoothed (e.g., red contours in Fig. 5c and  
784 Supplementary Fig. 6a). If multiple areas were obtained, the largest was used. Then, using the representation  
785 area, the overlap index was computed between responsive cells in each stimulus; overlap index =  $(A \cap B)/(A$   
786  $\cup B)$ , where  $(A \cap B)$  is the overlapping representation area between cell A and cell B, and  $(A \cup B)$  is a  
787 combined representation area between cell A and cell B (Supplementary Fig. 6a). Using the overlap index, a  
788 set of overlapping cells was selected for each responsive cell; the overlapping cells consisted of one responsive  
789 cell (reference cell) and other responsive cells that overlapped with the reference cell (overlap index  $> 0.2$ ).  
790 This analysis did not care whether other overlapping cells overlap each other or with other non-selected cells.

791 To evaluate the effects of cell drop, cells were randomly removed from the overlapping cells, and the  
792 reconstructed image was computed after each cell was dropped. The reference cell was initially removed, and  
793 then other remaining overlapping cells were removed in each cell drop sequence. Changes in the reconstructed  
794 images were estimated by quantifying the pixel-to-pixel correlation ( $R$ ) of a local part of the image. The local  
795 part of the image was determined as the representation area of the reference cell that was overlapped by the

796 area of at least one of other overlapping cells (overlapping area in Fig. 5c). A random drop of overlapping cells  
797 was repeated 120 times, and the results were averaged across the random orders in each reference cell. All  
798 responsive cells were used once as the reference cell in each stimulus image. This analysis only used data for  
799 images including at least 5 responsive cells and sets of overlapping cells including at least 5 overlapping cells.

800

### 801 **Across-trial similarity and variability**

802 To estimate the reliability of reconstructed image (or response patterns) across trials, two measures were used:  
803 across-trial similarity and across-trial variability. For the across-trial similarity of reconstructed images (or  
804 response patterns) (Fig. 6c), Pearson's correlations between single-trial reconstructed images (or response  
805 patterns) and their trial-average were computed and averaged across trials.

806 For the across-trial variability (Fig. 6d–g), normalised squared errors between single-trial images (or  
807 response patterns) and trial-averaged images (or response patterns) were computed using the following  
808 equation:  $\frac{1}{N_{\text{trial}}} \sum_t [\sum_u (\mathbf{A} - \mathbf{A}_{\text{av}})^2 / \sum_u (\mathbf{A}_{\text{av}} - \overline{\mathbf{A}_{\text{av}}})^2]$  ( $\mathbf{A}$ : single-trial reconstructed image or response  
809 patterns,  $\mathbf{A}_{\text{av}}$ : trial-averaged reconstructed image or response pattern,  $\overline{\mathbf{A}_{\text{av}}}$ : mean of  $\mathbf{A}_{\text{av}}$  across pixels  
810 or cells.  $N_{\text{trial}}$ : the number of trials.  $\sum_t$ : summation across trials.  $\sum_u$ : summation across pixels or cells).

811 In the analysis in Fig. 6f and 6g, the overlapping cells were selected as described above for each  
812 responsive cell (i.e., the reference cell. See the section of **Robustness of image reconstruction against cell  
813 drop**). The reference cell was initially selected, and then other overlapping cells were randomly selected for a  
814 set of cells that used for image reconstruction (the sequences of random cell selection was repeated 200 times.).  
815 The image was reconstructed from the subset of overlapping cells, and across-trial variability of a local part  
816 (i.e., overlapping area) of the reconstructed image was computed for each subset of cells. Only data for images  
817 that contained at least 5 responsive cells were used in the analyses in Fig. 6.

818

### 819 **Noise correlation**

820 In the analysis in Supplementary Fig. 7, the noise correlation was computed using responses across stimuli.

821 Evoked responses in each stimulus image were transformed to z-score and collected across stimuli in each cell.  
822 Then, Pearson's correlation coefficient was computed between the collected responses in a cell pair and used  
823 as the noise correlation. To remove the noise correlation, responses to each stimulus were shuffled across trials  
824 independently in each cell. Using the shuffled data, image reconstruction model was obtained as described  
825 above for the analyses in Fig. 6g, Supplementary Fig. 7g–i, 7p–r, and Supplementary Fig. 9f.

826

### 827 **Capacity of image representation by encoded features in a population**

828 The analysis in Fig. 7e–g examined whether the features encoded by responsive cells could represent image as  
829 a basis function independent of actual neural responses. If the features encoded by responsive neurons can  
830 represent any image, a set of features of a given image ( $\mathbf{F}$ ) will be linearly regressed by the weights of  
831 responsive cells in the cell-selection model,  $\mathbf{H}$  ( $= [\mathbf{H}^1; \dots; \mathbf{H}^{1248}]$ ,  $f \times N_{\text{cel}}$ .  $\mathbf{H}^k$  in eq. 4),

$$\mathbf{F} = \mathbf{H} * \mathbf{B} + \mathbf{d} + \mathbf{e}$$

832 where  $\mathbf{B}$  and  $\mathbf{d}$  are free parameters that are calculated to minimize the sum of squared error,  $\sum(\mathbf{F} - (\mathbf{H} * \mathbf{B} +$   
833  $\mathbf{d}))^2$ , and  $\mathbf{e}$  is an error term.  $\mathbf{F}$  was selected from a test dataset and  $\mathbf{H}$  was obtained from a training dataset in  
834 the 10-fold CV. The fitting was evaluated by calculating the fitting error (error) on the image  
835 space as follows:

$$\begin{aligned} \mathbf{I}' &= \mathbf{G}_{\text{rev}} * \mathbf{F} \\ \hat{\mathbf{I}} &= \mathbf{G}_{\text{rev}} * \hat{\mathbf{F}}, \quad \hat{\mathbf{F}} = \mathbf{H} * \mathbf{B} + \mathbf{d} \\ \text{Error} &= \sum(\mathbf{I}' - \hat{\mathbf{I}})^2 / \sum(\mathbf{I}' - \mathbf{I}'_{\text{mean}})^2 \times 100 \end{aligned}$$

836 where  $\mathbf{G}_{\text{rev}}$  is the Gabor filter matrix for reconstruction (eq. 2), and  $\mathbf{I}'_{\text{mean}}$  is the mean pixel  
837 intensity of  $\mathbf{I}'$ . Thus, this analysis estimated how well the features of individual neurons in a  
838 local population could represent the image features independent of actual neuronal activity. In  
839 other words, this analysis estimated the upper bound capacity of a local population to represent  
840 any image with an ideal combination of cell features (with parameters  $\mathbf{B}$  and  $\mathbf{d}$ ).

841

### 842 **Effects of locomotion state on image reconstruction**

843 Because the awake mice were not trained to run, they often stayed calmly during imaging. In the analyses  
844 shown in Supplementary Fig, 11, we included only data from two planes in one mouse (Thy1-GCaMP6s  
845 mouse) that ran relatively frequently. Furthermore, we used only data for images that contained at least five  
846 responsive cells, four running trials and four staying trials (80 image cases,  $n = 295$  responsive cells). The  
847 running modulation index (RMI) for each cell was defined as follows:  $RMI = (R_{run} - R_{stay}) / (R_{run} + R_{stay})$ , where  
848  $R_{run}$  and  $R_{stay}$  were the mean evoked responses during running and stay periods, respectively. RMI was  
849 computed in each responded image and averaged across images in each cell. Image reconstruction was  
850 performed using data with both conditions, and the performances were collected separately in each condition  
851 (Supplementary Fig. 11d and e).

852

### 853 **Statistical analyses.**

854 All data are presented as the median and 25–75<sup>th</sup> percentiles unless indicated otherwise. The significant level  
855 was set to 0.05, with the exception of the criteria of significant visual response (0.01). When more than two  
856 groups were compared, the significant level was adjusted with the Bonferroni correction except for the  
857 visually responsive cell analysis. Two-sided test was used in all analyses. The experiments were not  
858 performed in a blind manner. The sample sizes were not predetermined by any statistical methods but are  
859 comparable to the sample size of other reports in the field.

860

### 861 **Data availability.**

862 The datasets of the current study and the code used to analyse them are available from the corresponding  
863 authors on reasonable request.

864

### 865 **References**

- 866 1. Rolls, E.T. & Tovee, M.J. Sparseness of the neuronal representation of stimuli in the primate  
867 temporal visual cortex. *J Neurophysiol* **73**, 713-726 (1995).
- 868 2. Vinje, W.E. & Gallant, J.L. Sparse Coding and Decorrelation in Primary Visual Cortex During

- 869 Natural Vision. *Science* **287**, 1273-1276 (2000).
- 870 3. Weliky, M., Fiser, J., Hunt, R.H. & Wagner, D.N. Coding of natural scenes in primary visual  
871 cortex. *Neuron* **37**, 703-718 (2003).
- 872 4. Olshausen, B.A. & Field, D.J. Sparse coding of sensory inputs. *Curr Opin Neurobiol* **14**, 481-487  
873 (2004).
- 874 5. Froudarakis, E., *et al*. Population code in mouse V1 facilitates readout of natural scenes  
875 through increased sparseness. *Nat Neurosci* **17**, 851-857 (2014).
- 876 6. Yen, S.C., Baker, J. & Gray, C.M. Heterogeneity in the responses of adjacent neurons to natural  
877 stimuli in cat striate cortex. *J Neurophysiol* **97**, 1326-1341 (2007).
- 878 7. Yao, H., Shi, L., Han, F., Gao, H. & Dan, Y. Rapid learning in cortical coding of visual scenes.  
879 *Nat Neurosci* **10**, 772-778 (2007).
- 880 8. Tolhurst, D.J., Smyth, D. & Thompson, I.D. The sparseness of neuronal responses in ferret  
881 primary visual cortex. *J Neurosci* **29**, 2355-2370 (2009).
- 882 9. Willmore, B.D., Mazer, J.A. & Gallant, J.L. Sparse coding in striate and extrastriate visual  
883 cortex. *J Neurophysiol* **105**, 2907-2919 (2011).
- 884 10. Field, D.J. What Is the Goal of Sensory Coding. *Neural Comput* **6**, 559-601 (1994).
- 885 11. Jones, J.P. & Palmer, L.A. An evaluation of the two-dimensional Gabor filter model of simple  
886 receptive fields in cat striate cortex. *J Neurophysiol* **58**, 1233-1258 (1987).
- 887 12. Olshausen, B.A. & Field, D.J. Emergence of simple-cell receptive field properties by learning a  
888 sparse code for natural images. *Nature* **381**, 607-609 (1996).
- 889 13. Bell, A.J. & Sejnowski, T.J. The "independent components" of natural scenes are edge filters.  
890 *Vision Research* **37**, 3327-3338 (1997).
- 891 14. Tang, S., *et al*. Large-scale two-photon imaging revealed super-sparse population codes in the  
892 V1 superficial layer of awake monkeys. *Elife* **7** (2018).
- 893 15. Stanley, G.B., Li, F.F. & Dan, Y. Reconstruction of natural scenes from ensemble responses in  
894 the lateral geniculate nucleus. *J Neurosci* **19**, 8036-8042 (1999).
- 895 16. Miyawaki, Y., *et al*. Visual Image Reconstruction from Human Brain Activity using a  
896 Combination of Multiscale Local Image Decoders. *Neuron* **60**, 915-929 (2008).
- 897 17. Naselaris, T., Prenger, R.J., Kay, K.N., Oliver, M. & Gallant, J.L. Bayesian reconstruction of  
898 natural images from human brain activity. *Neuron* **63**, 902-915 (2009).
- 899 18. Nishimoto, S., *et al*. Reconstructing visual experiences from brain activity evoked by natural  
900 movies. *Curr Biol* **21**, 1641-1646 (2011).
- 901 19. Horikawa, T., Tamaki, M., Miyawaki, Y. & Kamitani, Y. Neural decoding of visual imagery  
902 during sleep. *Science* **340**, 639-642 (2013).
- 903 20. Doi, E. & Lewicki, M.S. Sparse Coding of Natural Images Using an Overcomplete Set of Limited

- 904 Capacity Units. *In: Advances in Neural Information Processing Systems (NIPS 2004)* **17**, 377-384  
905 (2005).
- 906 21. Smith, S.L. & Hausser, M. Parallel processing of visual space by neighboring neurons in mouse  
907 visual cortex. *Nat Neurosci* **13**, 1144-1149 (2010).
- 908 22. Bonin, V., Histed, M.H., Yurgenson, S. & Reid, R.C. Local diversity and fine-scale organization  
909 of receptive fields in mouse visual cortex. *J Neurosci* **31**, 18506-18521 (2011).
- 910 23. Kampa, B.M., Roth, M.M., Gobel, W. & Helmchen, F. Representation of visual scenes by local  
911 neuronal populations in layer 2/3 of mouse visual cortex. *Front Neural Circuits* **5**, 18 (2011).
- 912 24. Ko, H., *et al.* Functional specificity of local synaptic connections in neocortical networks. *Nature*  
913 **473**, 87-91 (2011).
- 914 25. Marshel, J.H., Garrett, M.E., Nauhaus, I. & Callaway, E.M. Functional specialization of seven  
915 mouse visual cortical areas. *Neuron* **72**, 1040-1054 (2011).
- 916 26. Miller, J.e.K., Ayzenshtat, I., Carrillo-Reid, L. & Yuste, R. Visual stimuli recruit intrinsically  
917 generated cortical ensembles. *Proceedings of the National Academy of Sciences* **111**, E4053-E4061  
918 (2014).
- 919 27. Rikhye, R.V. & Sur, M. Spatial Correlations in Natural Scenes Modulate Response Reliability in  
920 Mouse Visual Cortex. *J Neurosci* **35**, 14661-14680 (2015).
- 921 28. Olshausen, B.A. & Field, D.J. How Close Are We to Understanding V1? *Neural Comput* **17**,  
922 1665-1699 (2005).
- 923 29. Shoham, S., O'Connor, D.H. & Segev, R. How silent is the brain: is there a "dark matter"  
924 problem in neuroscience? *J Comp Physiol A Neuroethol Sens Neural Behav Physiol* **192**, 777-784  
925 (2006).
- 926 30. Yoshida, T. & Ohki, K. Visual image reconstruction from neuronal activities in the mouse  
927 primary visual cortex. *Program No. 415.17. 2015 Neuroscience Meeting Planner. Chicago, IL:*  
928 *Society for Neuroscience, 2015. Online.* (2015).
- 929 31. Yoshida, T. & Ohki, K. Representation of natural image contents by sparsely active neurons in  
930 visual cortex. *bioRxiv* (2018).
- 931 32. Smyth, D., Willmore, B., Baker, G.E., Thompson, I.D. & Tolhurst, D.J. The Receptive-Field  
932 Organization of Simple Cells in Primary Visual Cortex of Ferrets under Natural Scene Stimulation.  
933 *The Journal of Neuroscience* **23**, 4746-4759 (2003).
- 934 33. Ko, H., *et al.* The emergence of functional microcircuits in visual cortex. *Nature* **496**, 96-100  
935 (2013).
- 936 34. Cossell, L., *et al.* Functional organization of excitatory synaptic strength in primary visual  
937 cortex. *Nature* **518**, 399-403 (2015).
- 938 35. Niell, C.M. & Stryker, M.P. Highly selective receptive fields in mouse visual cortex. *J Neurosci*

- 939 **28**, 7520-7536 (2008).
- 940 36. Shadlen, M.N. & Newsome, W.T. Noise, neural codes and cortical organization. *Current Opinion*  
941 *in Neurobiology* **4**, 569-579 (1994).
- 942 37. Zohary, E., Shadlen, M.N. & Newsome, W.T. Correlated neuronal discharge rate and its  
943 implications for psychophysical performance. *Nature* **370**, 140 (1994).
- 944 38. Moreno-Bote, R., *et al*. Information-limiting correlations. *Nat Neurosci* **17**, 1410-1417 (2014).
- 945 39. Cohen, M.R. & Kohn, A. Measuring and interpreting neuronal correlations. *Nat Neurosci* **14**,  
946 811-819 (2011).
- 947 40. Chen, T.W., *et al*. Ultrasensitive fluorescent proteins for imaging neuronal activity. *Nature* **499**,  
948 295-300 (2013).
- 949 41. Dana, H., *et al*. Thy1-GCaMP6 transgenic mice for neuronal population imaging in vivo. *PLoS*  
950 *One* **9**, e108697 (2014).
- 951 42. Madisen, L., *et al*. A robust and high-throughput Cre reporting and characterization system for  
952 the whole mouse brain. *Nat Neurosci* **13**, 133-140 (2010).
- 953 43. Taniguchi, H., *et al*. A resource of Cre driver lines for genetic targeting of GABAergic neurons in  
954 cerebral cortex. *Neuron* **71**, 995-1013 (2011).
- 955 44. Niell, C.M. & Stryker, M.P. Modulation of visual responses by behavioral state in mouse visual  
956 cortex. *Neuron* **65**, 472-479 (2010).
- 957 45. Ayaz, A., Saleem, A.B., Scholvinck, M.L. & Carandini, M. Locomotion controls spatial  
958 integration in mouse visual cortex. *Curr Biol* **23**, 890-894 (2013).
- 959 46. Greenberg, D.S., Houweling, A.R. & Kerr, J.N. Population imaging of ongoing neuronal activity  
960 in the visual cortex of awake rats. *Nat Neurosci* **11**, 749-751 (2008).
- 961 47. Rehn, M. & Sommer, F.T. A network that uses few active neurones to code visual input predicts  
962 the diverse shapes of cortical receptive fields. *J Comput Neurosci* **22**, 135-146 (2007).
- 963 48. Olshausen, B.A., Cadieu, C.F. & Warland, D.K. Learning real and complex overcomplete  
964 representations from the statistics of natural images. *SPIE Optical Engineering + Applications* **7446**,  
965 11 (2009).
- 966 49. Olshausen, B.A. Highly overcomplete sparse coding. **8651**, 86510S (2013).
- 967 50. Srivastava, N., Hinton, G., Krizhevsky, A., Sutskever, I. & Salakhutdinov, R. Dropout: a simple  
968 way to prevent neural networks from overfitting. *J. Mach. Learn. Res.* **15**, 1929-1958 (2014).
- 969 51. Stringer, C., Pachitariu, M., Steinmetz, N., Carandini, M. & Harris, K.D. High-dimensional  
970 geometry of population responses in visual cortex. *Nature* **571**, 361-365 (2019).
- 971 52. Nimmerjahn, A., Kirchhoff, F., Kerr, J.N. & Helmchen, F. Sulforhodamine 101 as a specific  
972 marker of astroglia in the neocortex in vivo. *Nat Methods* **1**, 31-37 (2004).
- 973 53. Ohki, K., Chung, S., Ch'ng, Y.H., Kara, P. & Reid, R.C. Functional imaging with cellular

- 974 resolution reveals precise micro-architecture in visual cortex. *Nature* **433**, 597-603 (2005).
- 975 54. Hagihara, K.M., Murakami, T., Yoshida, T., Tagawa, Y. & Ohki, K. Neuronal activity is not  
976 required for the initial formation and maturation of visual selectivity. *Nat Neurosci* **18**, 1780-1788  
977 (2015).
- 978 55. Mank, M., *et al*. A genetically encoded calcium indicator for chronic in vivo two-photon imaging.  
979 *Nat Methods* **5**, 805-811 (2008).
- 980 56. van Hateren, J.H. & van der Schaaf, A. Independent component filters of natural images  
981 compared with simple cells in primary visual cortex. *Proc Biol Sci* **265**, 359-366 (1998).
- 982 57. Olmos, A. & Kingdom, F.A. A biologically inspired algorithm for the recovery of shading and  
983 reflectance images. *Perception* **33**, 1463-1473 (2004).
- 984 58. Fei-Fei, L., Fergus, R. & Perona, P. Learning Generative Visual Models from Few Training  
985 Examples: An Incremental Bayesian Approach Tested on 101 Object Categories. *2004 Conference on*  
986 *Computer Vision and Pattern Recognition Workshop*, 178-178 (2004).
- 987 59. Peirce, J.W. Generating Stimuli for Neuroscience Using PsychoPy. *Front Neuroinform* **2**, 10  
988 (2008).
- 989 60. Stahl, J.S., van Alphen, A.M. & De Zeeuw, C.I. A comparison of video and magnetic search coil  
990 recordings of mouse eye movements. *Journal of Neuroscience Methods* **99**, 101-110 (2000).
- 991 61. Kerlin, A.M., Andermann, M.L., Berezovskii, V.K. & Reid, R.C. Broadly tuned response  
992 properties of diverse inhibitory neuron subtypes in mouse visual cortex. *Neuron* **67**, 858-871 (2010).
- 993 62. Treves, A. & Rolls, E.T. What determines the capacity of autoassociative memories in the brain?  
994 *Network: Computation in Neural Systems* **2**, 371-397 (1991).
- 995 63. Lee, T.S. Image Representation Using 2D Gabor Wavelets. *IEEE Trans. Pattern Anal. Mach.*  
996 *Intell* **18**, 959-971 (1996).
- 997 64. Kay, K.N., Naselaris, T., Prenger, R.J. & Gallant, J.L. Identifying natural images from human  
998 brain activity. *Nature* **452**, 352-355 (2008).
- 999 65. Bishop, C.M. *Pattern Recognition and Machine Learning (Information Science and Statistics)*  
1000 (Springer-Verlag New York, Inc., 2006).

1001

## 1002 **Acknowledgements**

1003 We thank Ms. Y. Sono, A. Hayashi, T. Inoue, A. Ohmori, A. Honda, M. Nakamichi for animal care, and all  
1004 members of Ohki laboratory for support and discussions. This work was supported by grants from Core  
1005 Research for Evolutionary Science and Technology (CREST)—Japan Agency for Medical Research and



1006 Development (AMED) (to K.O.), Japan Society for the Promotion of Science (JSPS) KAKENHI (Grant  
1007 number 19H05642, 25221001 and 25117004 to K.O. and 15K16573, 17K13276 to T.Y.), Brain Mapping by  
1008 Integrated Neurotechnologies for Disease Studies (Brain/MINDS)—AMED (to K.O.), Strategic International  
1009 Research Cooperative Program (SICP)—AMED (to K.O.), grants from the Ichiro Kanehara Foundation for the  
1010 Promotion of Medical Sciences and Medical Care, and the Uehara Memorial Foundation (to T.Y.).

1011

#### 1012 **Author contributions**

1013 T.Y. and K.O. designed the research. T.Y. performed experiments. T.Y. and K.O. analysed data and wrote the  
1014 manuscript. K.O. supervised the research.

1015

#### 1016 **Competing financial interests.**

1017 We declare no competing financial interests.

1018

#### 1019 **Legends**

#### 1020 **Figure 1. Sparse visual response to a natural image in mouse V1**

1021 **a.** Experimental schematic. Natural image flashes were presented as visual stimuli, and the activities of single  
1022 neurons in the mouse V1 were recorded using two-photon  $\text{Ca}^{2+}$  imaging.

1023 **b.** Trial-averaged time courses of visual responses to 10 natural images (images #6–15 in a row) in 10  
1024 representative cells (cells# 6–15 in a column). The three lines for each response indicate the mean and the  
1025 mean  $\pm$  the standard error across trials. Black: significant responses, grey: non-significant response, red line:  
1026 stimulus periods during which each image type was flashed three times.

1027 **c.** Plots of significant responses of all cells in an example plane ( $n = 726$  cells, upper left panel). Responses  
1028 shaded by the red line in the upper left panel correspond to responses presented in (b). The percentage of  
1029 responsive cells for each image (bottom panel) and the percentage of images to which each cell responded  
1030 (right panel) are shown as line graphs. Red lines (bottom and right panels) indicate median values. Cell

1031 numbers (cell #) were sorted by the percentage of images to which they responded, and image numbers (image  
1032 #) were sorted by the percentages of cells that responded to each image in descending order. Single images  
1033 activated relatively fewer neurons (bottom panel).

1034 **d.** Examples of population response patterns to three images. Left panels: Natural image stimuli and the spatial  
1035 distributions of responsive cells in an imaging area (side length: 507 microns). The red-filled and grey open  
1036 circles indicate the responsive and remaining cells, respectively. Right panels: Histograms of the visual  
1037 responses of neurons in a local population. In the top panel, cells are divided into responsive (red bars) and the  
1038 remaining groups (black bars) and are sorted by the response amplitude of each group to the natural image  
1039 presented in the upper left panel (descending order). Visual responses to other images are plotted in the middle  
1040 and bottom panels. The cell # order was fixed among the three histograms. Only a small number of responsive  
1041 neurons are duplicated among the three images.

1042 **e.** Distribution of the amplitude of responses to single images. The cell # is sorted by the amplitude of the  
1043 response to each image and averaged across images in a plane. After normalizing the cell # (x-axis), data were  
1044 collected across planes ( $n = 24$  planes). The median (thick line) and 25–75<sup>th</sup> percentiles (thin lines) are shown.  
1045 Small percentages of neurons exhibited higher response amplitudes.

1046 **f.** The percentages of visually responsive cells. Most cells in a population were visually responsive.

1047 **g.** The percentage of responsive cells per image. A small percentage of cells were responsive for each image.

1048 **h.** Percentages of responsive cells for the moving grating.

1049 **i.** Percentage of responsive cells for each direction of the moving grating.

1050 **j.** Percentages of overlap of responsive cells between the natural images. Only a small percentage of  
1051 responsive cells overlapped between images, indicating that the cells responding to each image were  
1052 distributed in a population.

1053 **k.** Population sparseness.

1054 **f–k.** Each dot indicates data obtained from one plane, and the medians of 24 planes are shown as bars

1055

1056 **Figure 2. Small overlap in the encoded visual features among cells in a local population**

1057 **a.** Schematic of transformation between natural image and feature values with Gabor filters. Each natural  
1058 image was subjected to Gabor filters to obtain the corresponding Gabor feature values. Conversely, a set of  
1059 Gabor feature values were transformed into an image by summing the Gabor filters after multiplying by the  
1060 corresponding Gabor feature values.

1061 **b.** Schematics of the Gabor filter set. Four orientations, two phases, four scales (or spatial frequencies) of  
1062 Gabor filters were used. The four scales of Gabor filters (spatial frequency: 0.02, 0.04, 0.09, and 0.18 cycle per  
1063 degree) were positioned on  $1 \times 1$ ,  $3 \times 3$ ,  $5 \times 5$ , and  $11 \times 11$  grids. A total of 1248 filters were used.

1064 **c.** Schematic of the encoding model of the visual response of a single cell. The visual response is represented  
1065 by weighted sum of the selected Gabor feature values obtained from a set of Gabor filters in each cell. The  
1066 predicted visual response to the image in the  $i$ th trial ( $R_i$ ) is represented by the following equation:  $R_i =$   
1067  $NL(\sum W_j \times F_{ji} + b)$ , where  $NL(\ )$  is a non-linear scaling function,  $W_j$  is the weight for  $j$ th Gabor feature, and  $F_{ji}$  is  
1068 the feature value for the  $j$ th Gabor filter ( $G_j$ ) obtained from  $i$ th trial image ( $I_i$ ). The Gabor feature was selected  
1069 based on the correlation between its feature values and visual response (Feature selection, see Methods).

1070 **d.** and **e.** Representative predicted responses of two neurons. Left panels: Comparison between the observed  
1071 and predicted responses, respectively. Each dot indicates a response to one image. Right panels: Weight  
1072 parameters of the representative neurons presented in the left panels. The weights of one of 10 models (each  
1073 model corresponds to one of the 10-fold cross validations) are shown. The number of non-zero weights (i.e.,  
1074 number of used features) is shown above the panels. Encoding filters (weighted sums of Gabor filters) are  
1075 shown in the insets (red and blue indicate positive and negative values, respectively).

1076 **f.** Comparison of the response predicted by only the linear step (regression of Gabor feature values without  
1077 non-linear (NL) scaling) and the observed response in the representative neuron shown in Fig. 2e. Each dot  
1078 indicates a response to one image. The red curve indicates the NL scaling function curve (see Methods). The  
1079 NL step resulted in an enhancement of the sparse visual responses. The black line indicates  $y = x$  line.

1080 **g.** NL scaling function curves across planes. Each grey curve was obtained by averaging the NL scaling curves

1081 across cells in each plane. Red curve indicates the averaged curve across planes ( $n = 24$  planes). The black line  
1082 indicates  $y = x$  line.

1083 **h.** Upper left panel: Raster plot of the weights in the plane illustrated in Fig. 1c (red: positive weight, blue:  
1084 negative weight). The median values for the models of the 10-fold CVs are shown. Right panel: Percentage of  
1085 features used for each cell. Bottom panel: Percentage of cells in which each feature was involved in the  
1086 response prediction. The coloured bar under the x-axis indicates the spatial frequency of the Gabor filter  
1087 corresponding to each feature. Red lines in the bottom and right panels indicate median values. Only half of  
1088 the Gabor features (624/1248 with one of two phase sets) are shown for visibility, but the remaining features  
1089 were included in the data shown in the right panel. SF: spatial frequency.

1090 **i.** Distribution of the number of features used in each cell ( $n = 12,755$  cells across 24 planes).

1091 **j.** Distribution of the percentages of features that overlapped between cells ( $n = 3,993,653$  cell pairs across 24  
1092 planes).

1093

### 1094 **Figure 3. Image reconstruction based on population activity**

1095 **a and b.** Schematic of the image reconstruction models. **a.** In the image reconstruction, each feature value was  
1096 reconstructed using responses of multiple cells. In the all-cell model, each feature value was reconstructed by  
1097 all cells. In the cell-selection model, the feature value was reconstructed by selected cells for each feature. The  
1098 cell selection was based on the response prediction model for each cell; each cell participates in the  
1099 reconstruction of features that the cell encodes in the response prediction model.

1100 **b.** Details of the image reconstruction model. For each Gabor feature,  $j$ , feature values ( $F_{ji}$ ,  $i$ : trial # across  
1101 stimuli and trials,  $j$ : Gabor feature #) were independently regressed (weights:  $H_{jk}$ ,  $k$ : cell #) by multiple cell  
1102 responses ( $R_{ki}$ ) to the image ( $I_i$ ) in the  $i$ th trial ( $F_{ji} = \sum(H_{jk} \times R_{ki}) + c$ .  $c$ : a bias, not shown in the figure). Then,  
1103 a set of reconstructed features ( $F_{1i}$ ,  $F_{2i}$ , ...,  $F_{ji}$ ) was transformed into an image ( $\hat{I}_i$ ). The flow of the  
1104 reconstruction model is represented by black arrows from the bottom to the top.

1105 **c.** Examples of reconstructed images from main datasets (dataset 1, 200 images). Stimulus images (top),

1106 images that were reconstructed using the all-cell model (all-cell, middle) and using the cell-selection model  
1107 (cell-selection, bottom) are shown. Each reconstructed image was averaged across trials. The reconstruction  
1108 performances (R and CD) were computed for each trial, and trial-averaged performances are presented below  
1109 each reconstructed image.

1110 **d.** Examples of reconstructed images from other datasets (dataset 2, 1000–2000 images).

1111 **e.** Distributions of R (top) and CD values (bottom) for the all-cell model (black lines) and the cell-selection  
1112 model (red lines) in the example plane shown in Figs. 1 and 2 ( $n = 200$  images reconstructed using 726 cells  
1113 from a plane). Vertical lines indicate median values.

1114 **f** and **g.** R (**f**) and CD (**g**) of dataset 1 (black lines and bars) and of dataset 2 (green lines) across planes. \*:  $p =$   
1115  $0.006$  in (**f**) and  $p = 1.8 \times 10^{-5}$  in (**g**) using the signed-rank test ( $n = 24$  planes for dataset 1, and  $n = 4$  planes for  
1116 dataset 2). The reconstruction performance of the cell-selection model was comparable with or slightly higher  
1117 than that of the all-cell model.

1118

1119 **Figure 4. A small number of highly responsive neurons mainly represent the visual contents of a single**  
1120 **natural image.**

1121 **a–c.** Top panels: Examples of reconstructed images from a subset of highly responsive cells and all cells.  
1122 Stimulus images (1<sup>st</sup> panel) and reconstructed images (trial-average) from a subset of or all cells (2<sup>nd</sup>–4<sup>th</sup>  
1123 panels) are shown. Middle and bottom panels: Reconstruction performances (middle, R; bottom, CD) plotted  
1124 against the number of cells used for the reconstructions. Using the weight parameters of the cell-selection  
1125 model, the number of cells used to reconstruct each image was successively increased. The cells were first  
1126 collected from the responsive cells (red dots) and then from the remaining cells (black dots), and the cells were  
1127 ordered in each group using evoked response amplitude (descending order). The horizontal lines indicate the  
1128 performance from all cells, and the numbers of cells for peak performance within the number of responsive  
1129 cells are indicated by the vertical lines. In each case, the reconstruction performances of responsive cells were  
1130 similar or slightly higher than those of all cells.

1131 **d** and **e**. Average performance curve (d, R; e, CD) plotted against the cell number. The thick black line and  
1132 grey lines indicate the means and the means  $\pm$  standard errors, respectively (n = 24 planes). Data for images  
1133 including at least 10 responsive cells were only used.

1134 **f**. The contributions of the top 16 responsive cells to the image reconstruction shown in (a). In the top panels,  
1135 reverse filters (weighted sum of Gabor filters) multiplied by the visual responses reveal the spatial patterns of  
1136 an individual cell's contributions to the reconstructed image. The patterns vary among cells. In the bottom  
1137 panels, the reconstructed image gradually changes with the consecutive addition of single cells.

1138 **g** and **h**. Left panels: Performances (g, R; h, CD) obtained from all cells (All), highly responsive cells (Resp.)  
1139 and peak performance (Max.) were compared. The peak performance was detected within the number of  
1140 responsive neurons. Right panels: The number of cells used for the reconstruction was compared. Peak  
1141 performances tended to be obtained from fewer cells than the number of responsive cells. (g, left)  $P = 5.4 \times 10^{-5}$   
1142 for Max. vs. Resp.;  $P = 1.2 \times 10^{-4}$  for Resp. vs. All;  $P = 6.2 \times 10^{-5}$  for Max. vs. All. (g, right)  $P = 5.4 \times 10^{-5}$ . (h,  
1143 left)  $P = 5.4 \times 10^{-5}$  for Max. vs. Resp.;  $P = 3.3 \times 10^{-4}$  for Resp. vs. All;  $P = 1.3 \times 10^{-4}$  for Max. vs. All. (h, right)  $P$   
1144  $= 1.7 \times 10^{-5}$  using the signed-rank test (n = 24 planes). Each line indicates data for each plane, and bars indicate  
1145 medians. In the analyses (**g** and **h**), we used only data for images that had at least 10 responsive cells.

1146 **i-k**. Overlap of weights (i.e., features) between the cells that were highly responsive to the same image.

1147 (**i**) Schematic of the analysis. (**j**) Distribution of the percentages of overlapping features in all cell pairs  
1148 responding to the same image collected across planes. (**k**) The median percentages of overlapping features in  
1149 the cell pairs responding to the same image. Each dot indicates the median in each plane (n = 24 planes) and  
1150 the bar indicates the median across planes. The percentages of overlapping features were still low even in the  
1151 cell pairs responding to the same image.

1152

### 1153 **Figure 5. Robust image representation by small numbers of responsive neurons**

1154 **a**. Representative reconstructed images after the drop of a single cell. Top panels: Stimulus and reconstructed  
1155 image obtained from all responsive neurons (55 cells). Middle panels: Reconstructed images obtained after the

1156 drop of a single cell. Bottom panels: Representation patterns (reverse filters) of the dropped cells. The cell  
1157 number (cell #) is the same as shown in Fig. 4f.

1158 **b.** Reduction in reconstruction performance after removing a single cell. The cell # on the x-axis were ordered  
1159 from largest to smallest response amplitudes. The cell # was the same order as shown in Fig. 4d and 4e. Thick  
1160 line: median. Thin lines: 25<sup>th</sup> and 75<sup>th</sup> percentiles. N = 24 planes.

1161 **c.** Top panels: Reverse filters of overlapping cells (Example nine cells). The representation area of each neuron  
1162 was contoured by the red line and overlaid on the right panel. Middle panel: Reconstructed image obtained  
1163 from the nine overlapping cells. Bottom panels: Reconstructed images obtained from single cells (upper  
1164 panels) and reconstructed images after the drop of a single cell (lower panels). The drop of a single cell  
1165 exerted only a small effect on the reconstructed images.

1166 **d.** Representative reconstructed images obtained during the sequential drop of the nine overlapping neurons.  
1167 Cyan dotted lines indicate the overlapping area of the nine cells. The quality of the reconstructed image around  
1168 the overlapping areas gradually degraded after the drop of each cell.

1169 **e** and **f.** Plot of the R (or normalized R) for a local part of the reconstructed image (overlapping area) against  
1170 the number (or percentage) of dropped cells for the representative case shown in Fig. 5c (e) and for summary  
1171 of all data (f). Data were collected and averaged across cells and across stimuli in each plane and then  
1172 collected across planes. Thick lines: medians. Thin lines: 25<sup>th</sup> and 75<sup>th</sup> percentiles obtained across repetitions  
1173 of random drop (n = 120 repetitions, e) or across planes (n = 24 planes, f).

1174

### 1175 **Figure 6. Reliable image representation across trials**

1176 **a.** Examples of single-trial reconstructed images (top panels) and response patterns in a FOV (bottom panels).  
1177 The first panel is a stimulus image, and the last panel is a trial-averaged image. FOV size: 507 micron each  
1178 side. Colour code for each dot indicates response amplitude of each cell.

1179 **b.** Single-trial evoked responses to the image in (a).

1180 **c.** Across-trial similarity of reconstructed images (left) and response patterns of responsive cells (right). N = 24

1181 planes. The across-trial similarity was a Pearson's correlation between a single-trial reconstructed image (or  
1182 responses) and trial-averaged image (or responses).

1183 **d.** Across-trial variability of reconstructed images (left) and response patterns of responsive cells (right).  $N =$   
1184 24 planes. Normalised squared error between single-trial image (or response patterns) and trial-averaged  
1185 image (or response patterns) was computed and used for the across-trial variability.

1186 **e.** Reconstructed image from a set of overlapping cells (Cell# 1–9 in **b**). Upper left panels: Stimulus image and  
1187 trial-averaged reconstructed images from the nine overlapping cells. The cyan dotted line indicates the  
1188 overlapping area. Upper right panels: Representation (reverse filters) of the overlapping cells. The red line in  
1189 each panel indicates the representation area. Cell# 1 was the reference cell. Lower panels: Single-trial  
1190 representation patterns of three example cells (cell 1, 2, and 3) selected from the overlapping cells. Bottom  
1191 panels: Single-trial reconstructed images (upper) and single-trial response patterns in a FOV (lower) obtained  
1192 from the nine overlapping cells. Brightness of each colour dot in lower panels indicates response amplitude of  
1193 each cell.

1194 **f.** Across-trial variability of a local part of reconstructed image (cyan dotted line in **e**) against the number of  
1195 overlapping cells used for the reconstruction in the example case in **e**. Thick and thin lines were median and  
1196 25<sup>th</sup> or 75<sup>th</sup> percentile of the variability among 200 random sequences of cell adding.

1197 **g.** Across-trial variability against the percentage of the overlapping cells used for the reconstruction.  $N = 24$   
1198 planes. Black lines: Raw data. Orange lines: trial-shuffled data. Thick and thin lines were median and 25<sup>th</sup> or  
1199 75<sup>th</sup> percentile of the variability among 24 planes.

1200

1201 **Figure 7. Visual features of natural images are distributed among most neurons in a population**

1202 **a.** Schematic of the analysis. Responsive neurons (open and closed circles) were plotted for each image.  
1203 Closed circle: the responsive cells plotted for the first time at image  $N$ . Open circle: the responsive cells that  
1204 have already plotted in image 1–( $N-1$ ).  $N$ : image number.

1205 **b.** Raster plots of highly responsive cells for each image in the representative plane shown in the previous



1206 figures ( $n = 655/726$  responsive cells). The image # is sorted by the image reconstruction performance  
1207 (descending order, right panel). In each line, cells that did not respond to the previously plotted images are  
1208 added on the right side. As the image # increased, the number of newly added cells decreased, and then the cell  
1209 # quickly reached a plateau level, indicating that many images are represented by a combination of cells that  
1210 responded to other images. Thus, most images were represented with some degree of accuracy by a  
1211 combination of subsets of responsive cells in the population.

1212 **c.** The numbers of responsive cells (black line) and numbers of newly added responsive cells (red line) are  
1213 plotted against the image # for the case shown in **(b)**. Again, the number of newly added cells quickly  
1214 decreased as the image # increased.

1215 **d.** The numbers of responsive cells (black line) and numbers of newly added responsive cells (red line) are  
1216 plotted against the image #.  $N = 24$  planes. Three lines in each colour indicate the mean and the mean  $\pm$  the  
1217 standard errors.

1218 **e.** Schematic of the analysis. The feature set of each natural image was linearly regressed by the weights of the  
1219 image reconstruction model (the cell selection model) from all the responsive cells in each plane. The weights  
1220 of the reconstruction model were obtained based on a training dataset, and the target image was selected from  
1221 a test dataset. The fitting error (% error, see Methods) was computed for each image on image space. If the  
1222 features encoded in all responsive cells were sufficient to represent natural images, the weights of the  
1223 responsive cells should work as basis functions to represent the visual features of the natural images.

1224 **f.** Distributions of the errors of all images in the example plane (shown in other figures).

1225 **g.** The median percent error (% error) across planes (bar,  $n = 24$  planes). Each dot indicates the median of each  
1226 plane.

1227

## 1228 **Figure 8. Image reconstruction in awake mice.**

1229 **a–b.** Schematic of eye position analysis. **(a)** Image of a right eye. The white rectangle indicates an area  
1230 recorded during imaging and analysed offline (left). The recorded image (upper right panel) was binarized, and

1231 the pupil was fitted with an ellipse (red contour in lower right panel). Centre of ellipse was used to estimate the  
1232 eye position (red dot). Scale bars: 1mm. **(b)** Distribution map of eye position during imaging overlaid on the  
1233 image in **(a)**. The peak position of the distribution was detected, and data were used for subsequent analyses  
1234 only when the eye stayed around the peak position (white circle, < 3.5 degrees or ~70 microns on the image).  
1235 Scale bar: 1 mm.

1236 **c.** Examples of eye position and locomotion state during imaging. Upper two panels: Horizontal (X) and  
1237 vertical (Y) eye positions are shown. The red lines indicate time points at which eye stayed around the peak  
1238 position (inside the white circle in **b**). Lower two panels: Position and velocity of a disc-type treadmill. The  
1239 cyan lines indicate time points at which mice ran (velocity > 2 cm/sec).

1240 **d–h.** Image reconstruction by the cell-selection model in awake mice. **(d)** Examples of the reconstructed  
1241 images. **(e and f)** Reconstruction performances (**e**: pixel-to-pixel correlation, **R**. **f**: coefficient of determination,  
1242 CD).  $N = 7$  planes. **(g and h)** **R** (**e**) and CD (**h**) against the number of neurons. A single image was  
1243 reconstructed by a small number of neurons. The thick black line and grey lines indicate the means and the  
1244 means  $\pm$  standard errors, respectively ( $n = 6$  planes). Data for images including at least 10 responsive cells  
1245 were only used.

Yoshida and Ohki, Figure 1

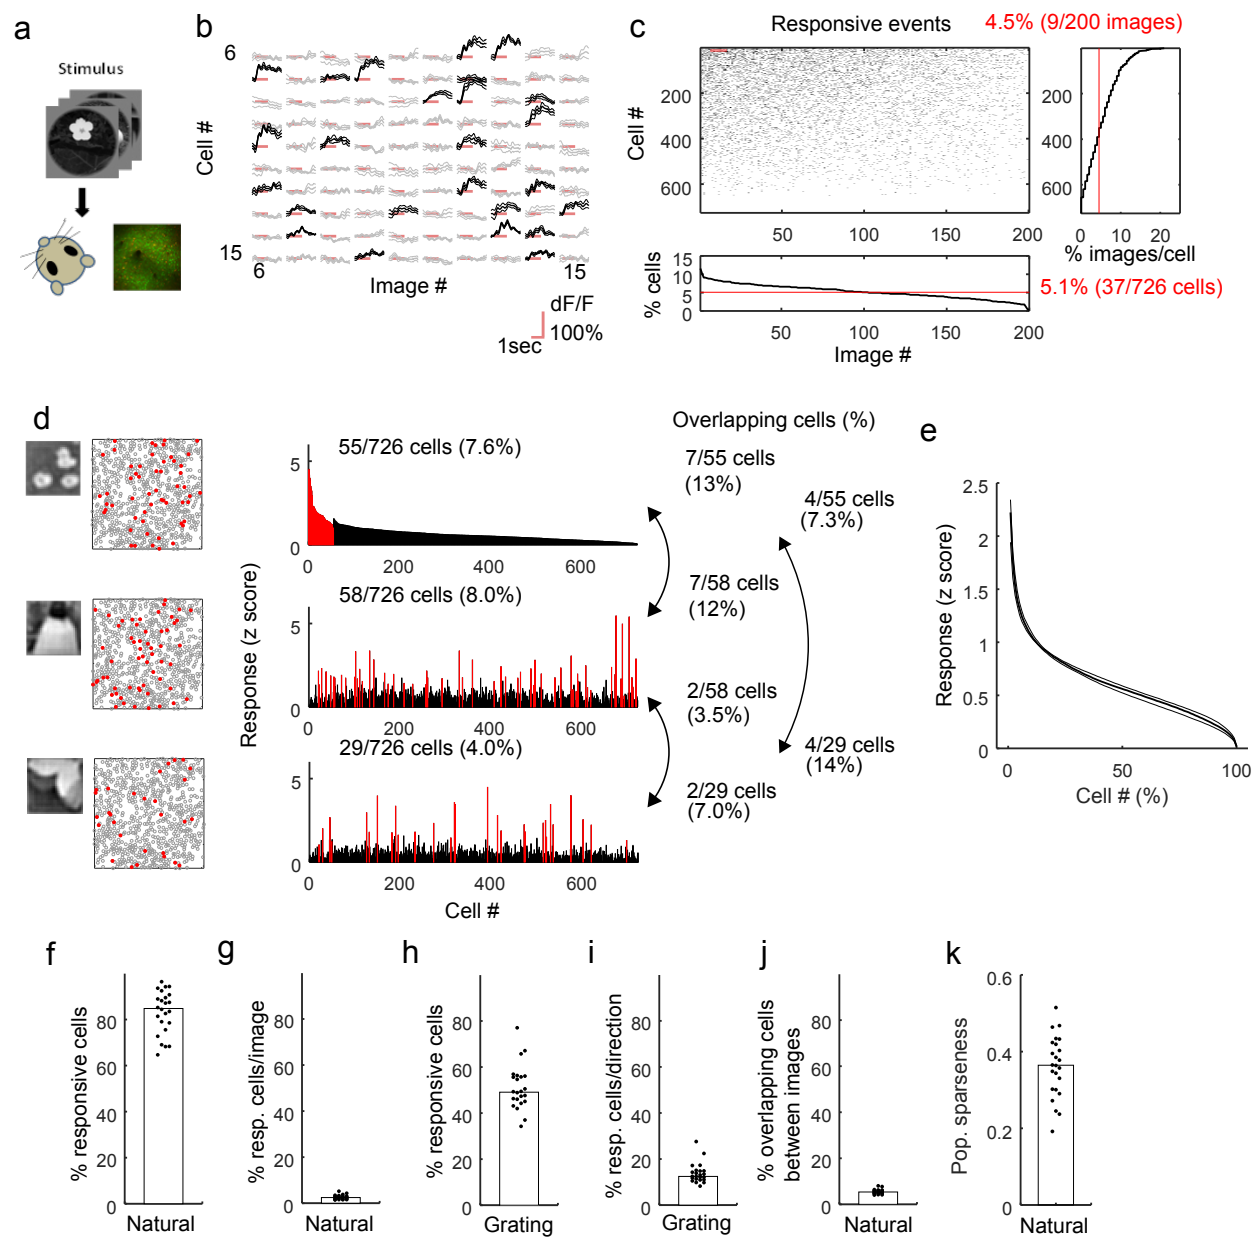

# Yoshida and Ohki, Figure 2

bioRxiv preprint doi: <https://doi.org/10.1101/300863>; this version posted December 12, 2019. The copyright holder for this preprint (which was not certified by peer review) is the author/funder. All rights reserved. No reuse allowed without permission.

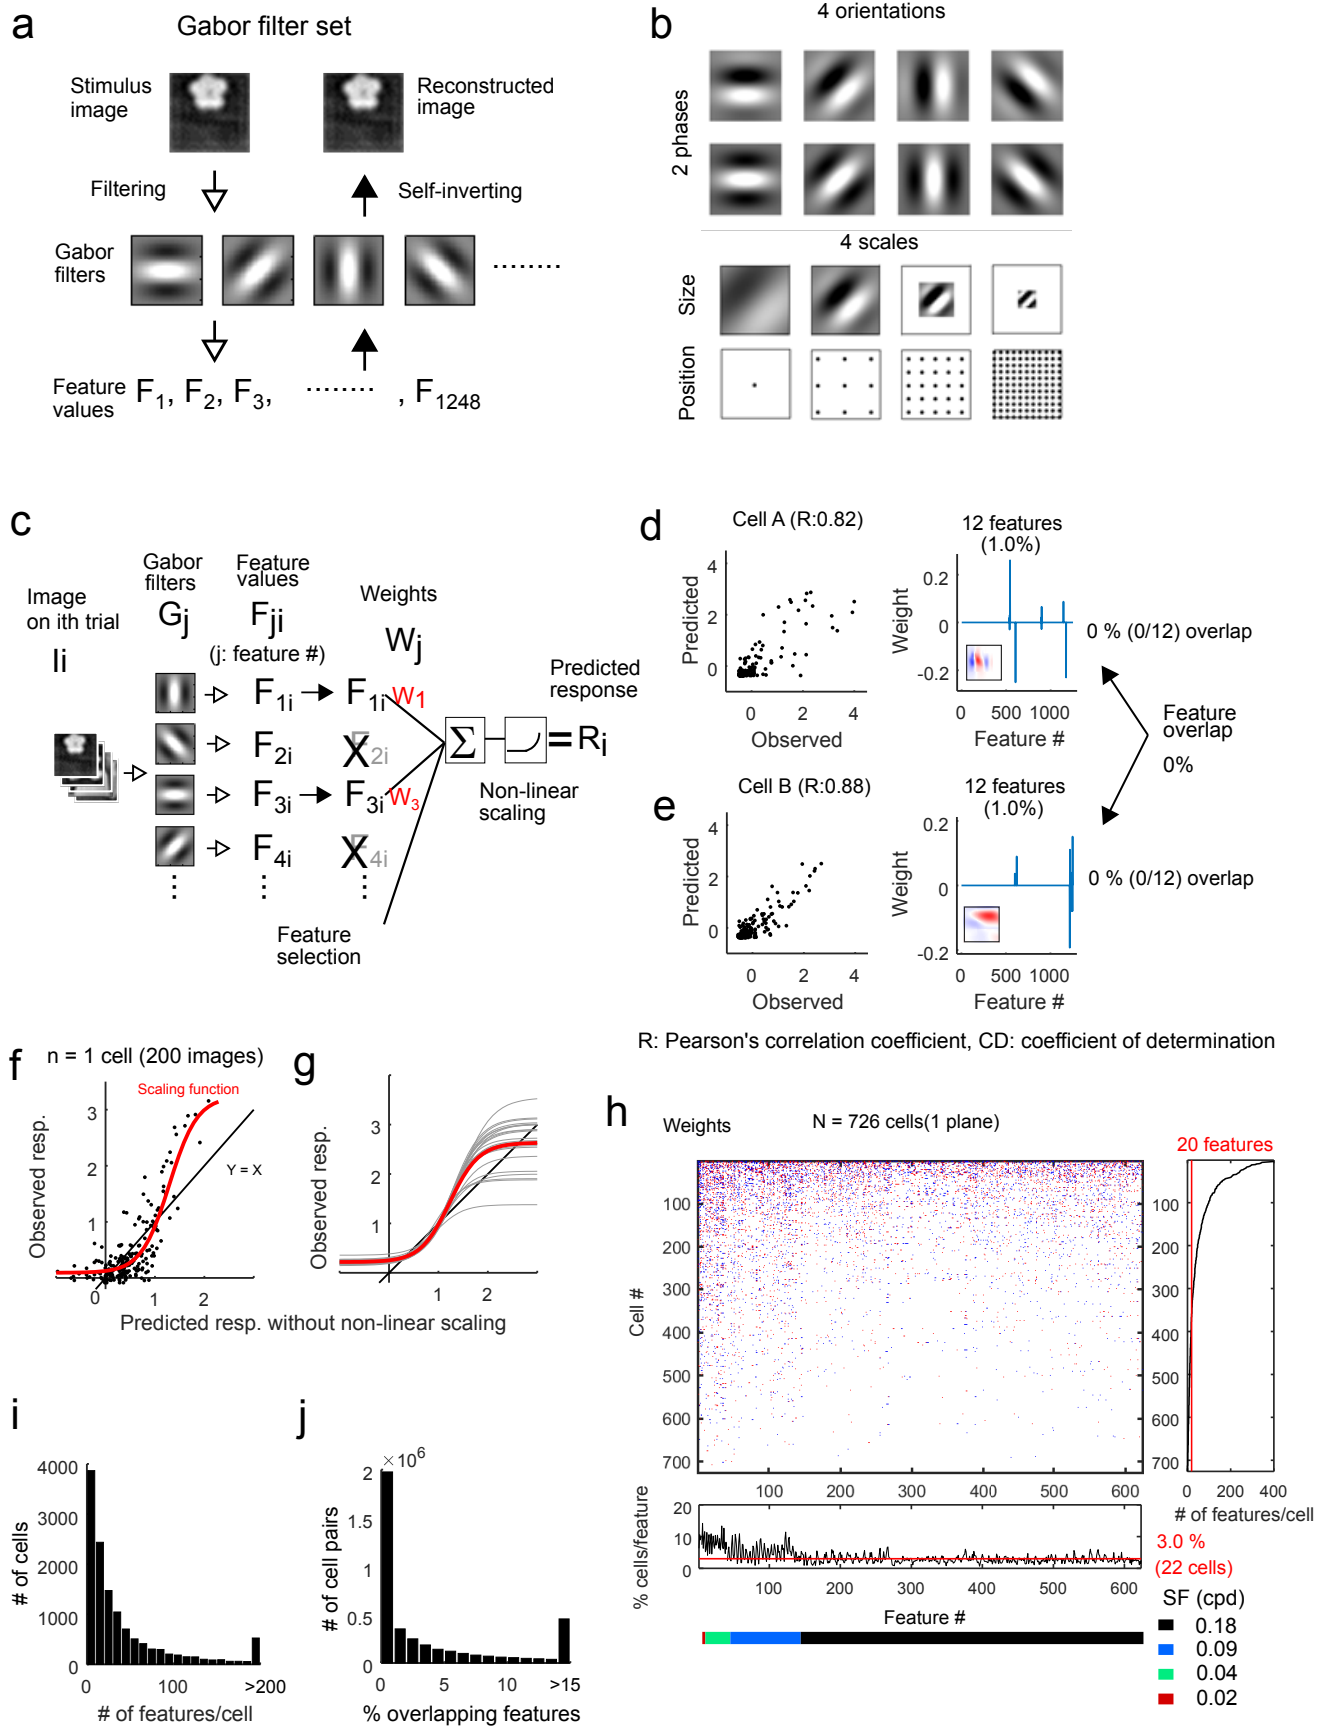

bioRxiv preprint doi: <https://doi.org/10.1101/300863>; this version posted December 12, 2019. The copyright holder for this preprint (which was not certified by peer review) is the author/funder. All rights reserved. No reuse allowed without permission.

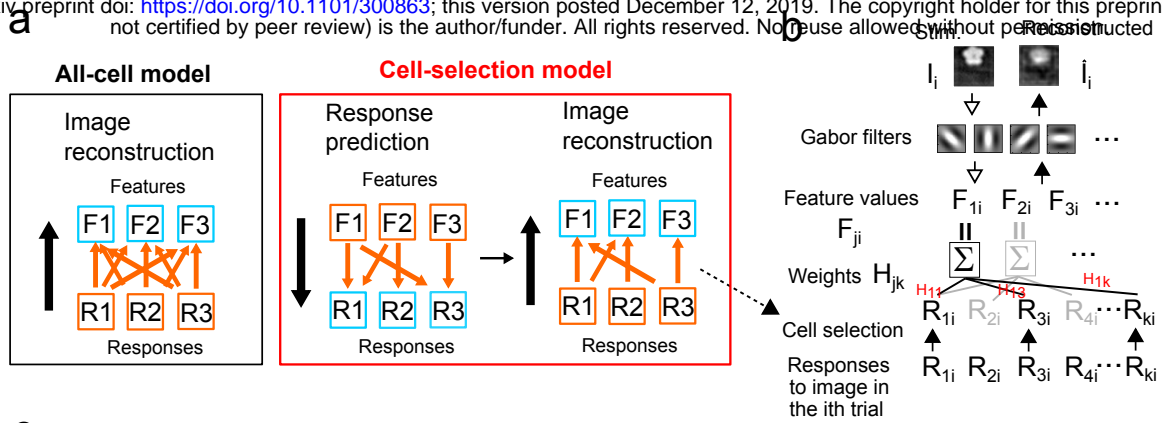

**c** Examples of reconstructed images from a plane (dataset 1,  $n = 200$  images)

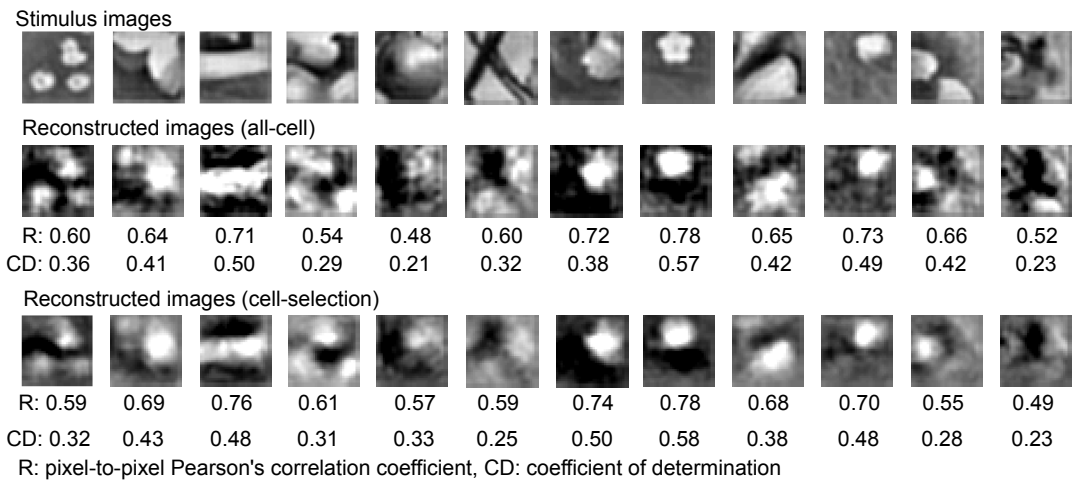

**d** Examples of reconstructed images from a plane (dataset 2,  $n = 2000$  images)

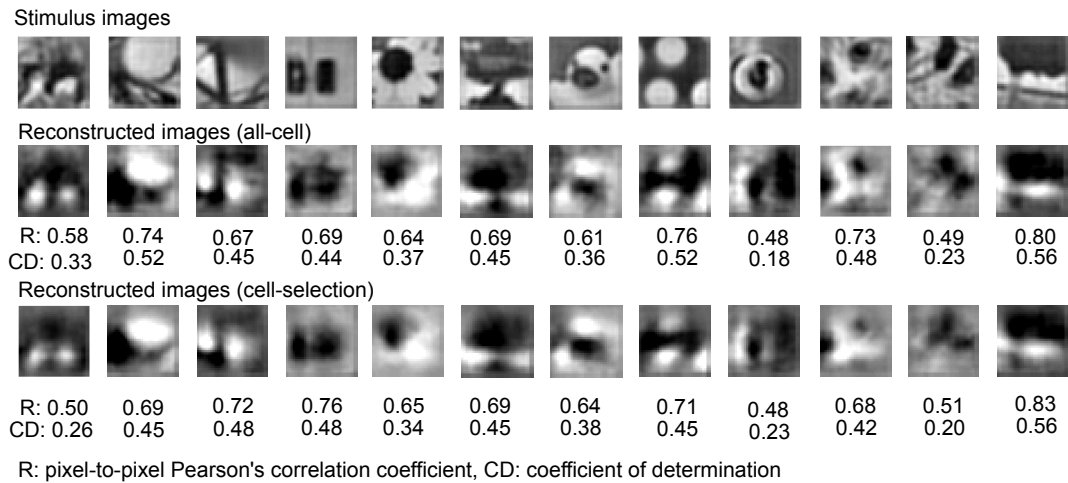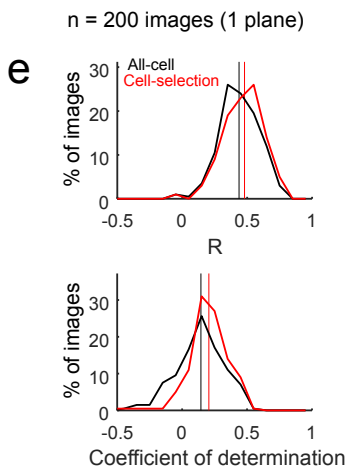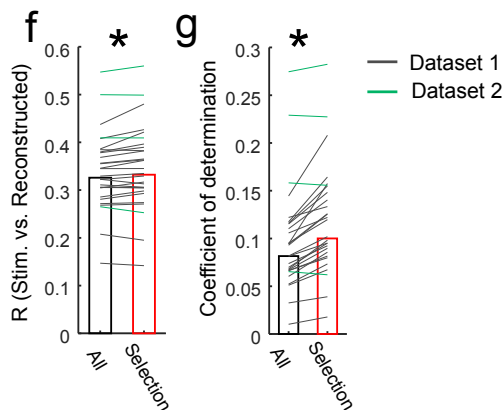

# Yoshida and Ohki, Figure 4

bioRxiv preprint doi: <https://doi.org/10.1101/300863>; this version posted December 12, 2019. The copyright holder for this preprint (which was not certified by peer review) is the author/funder. All rights reserved. No reuse allowed without permission.

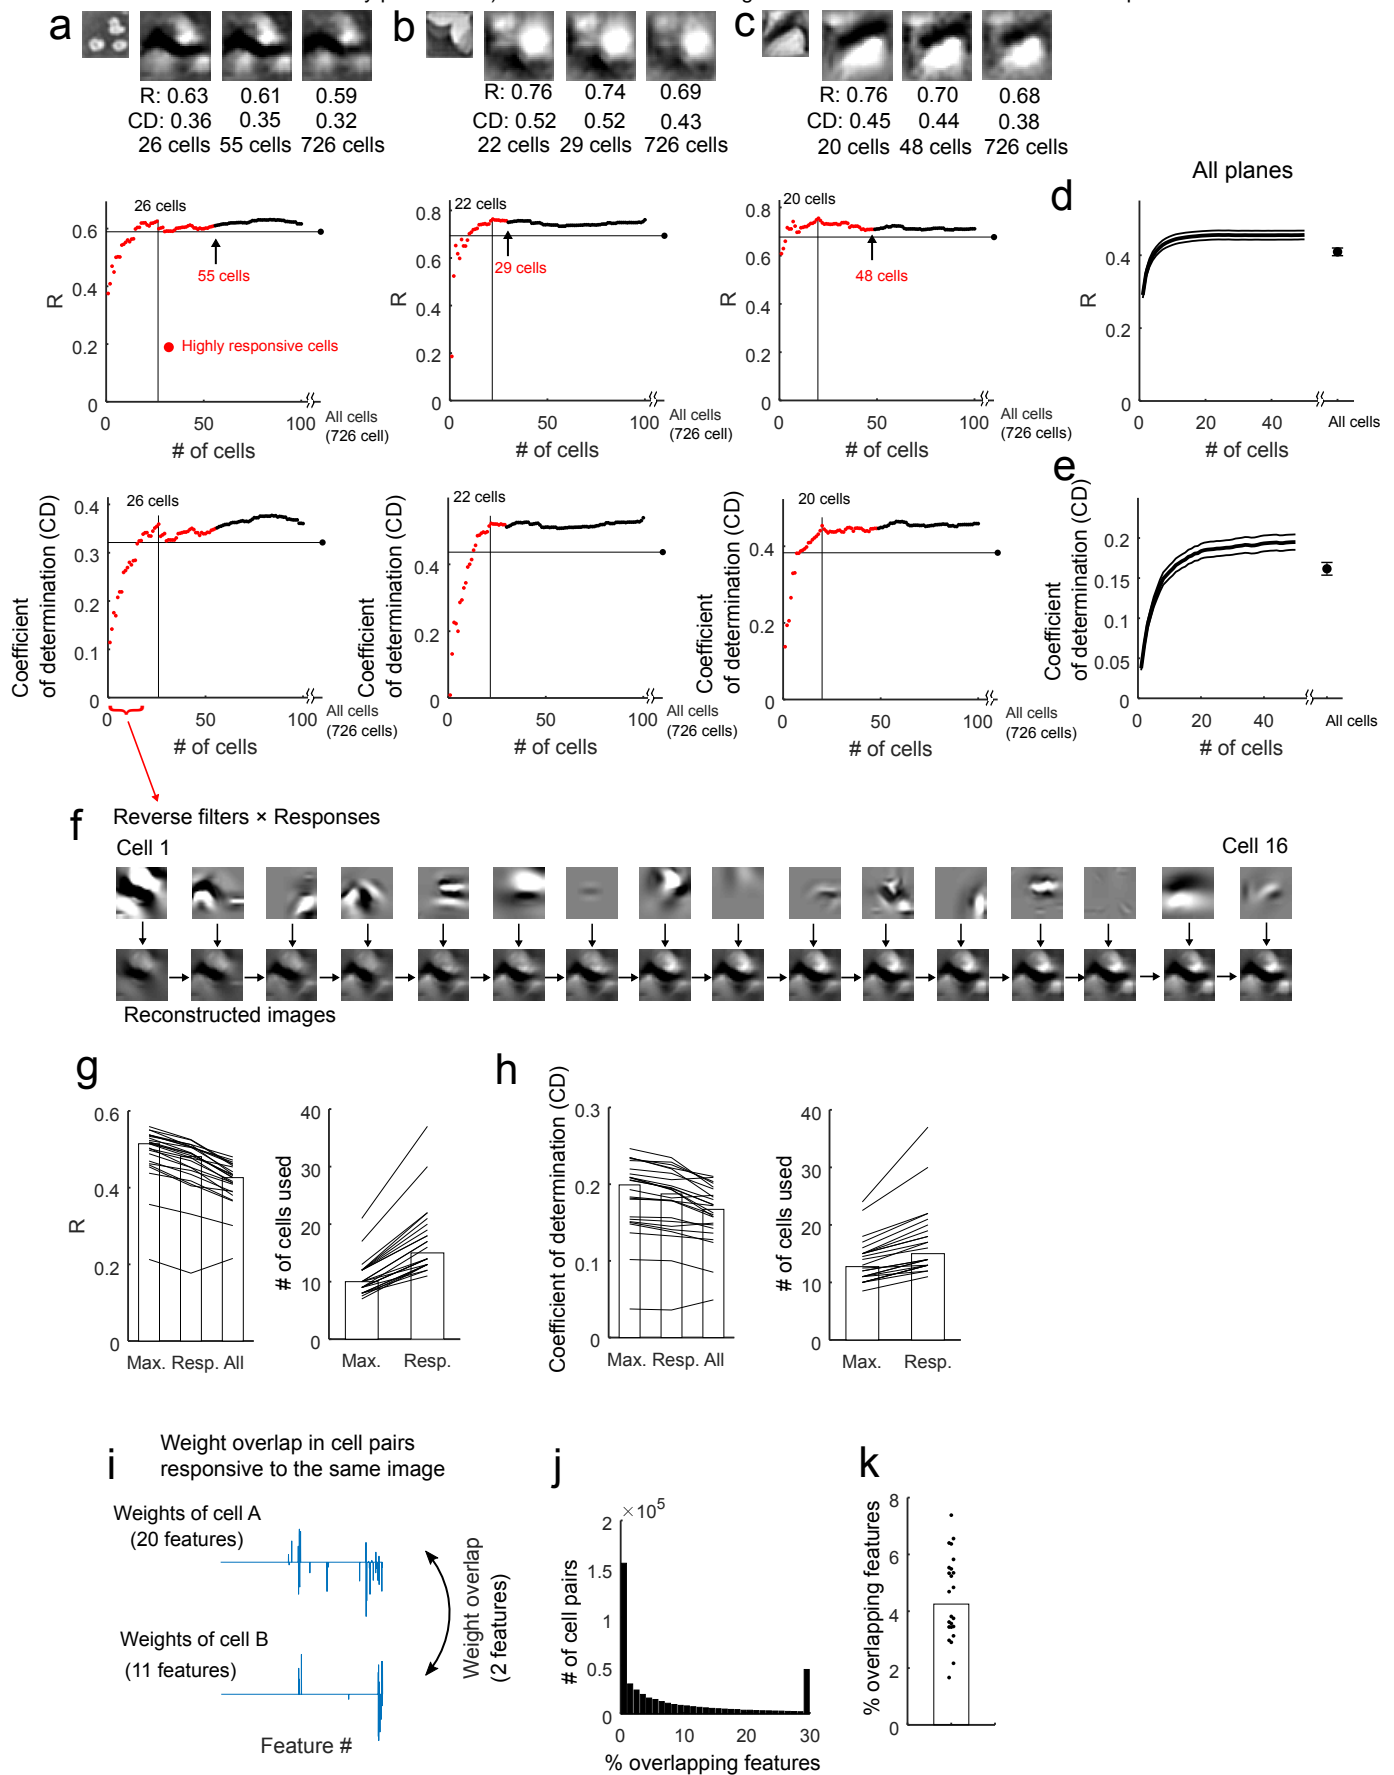

Yoshida and Ohki, Figure 5

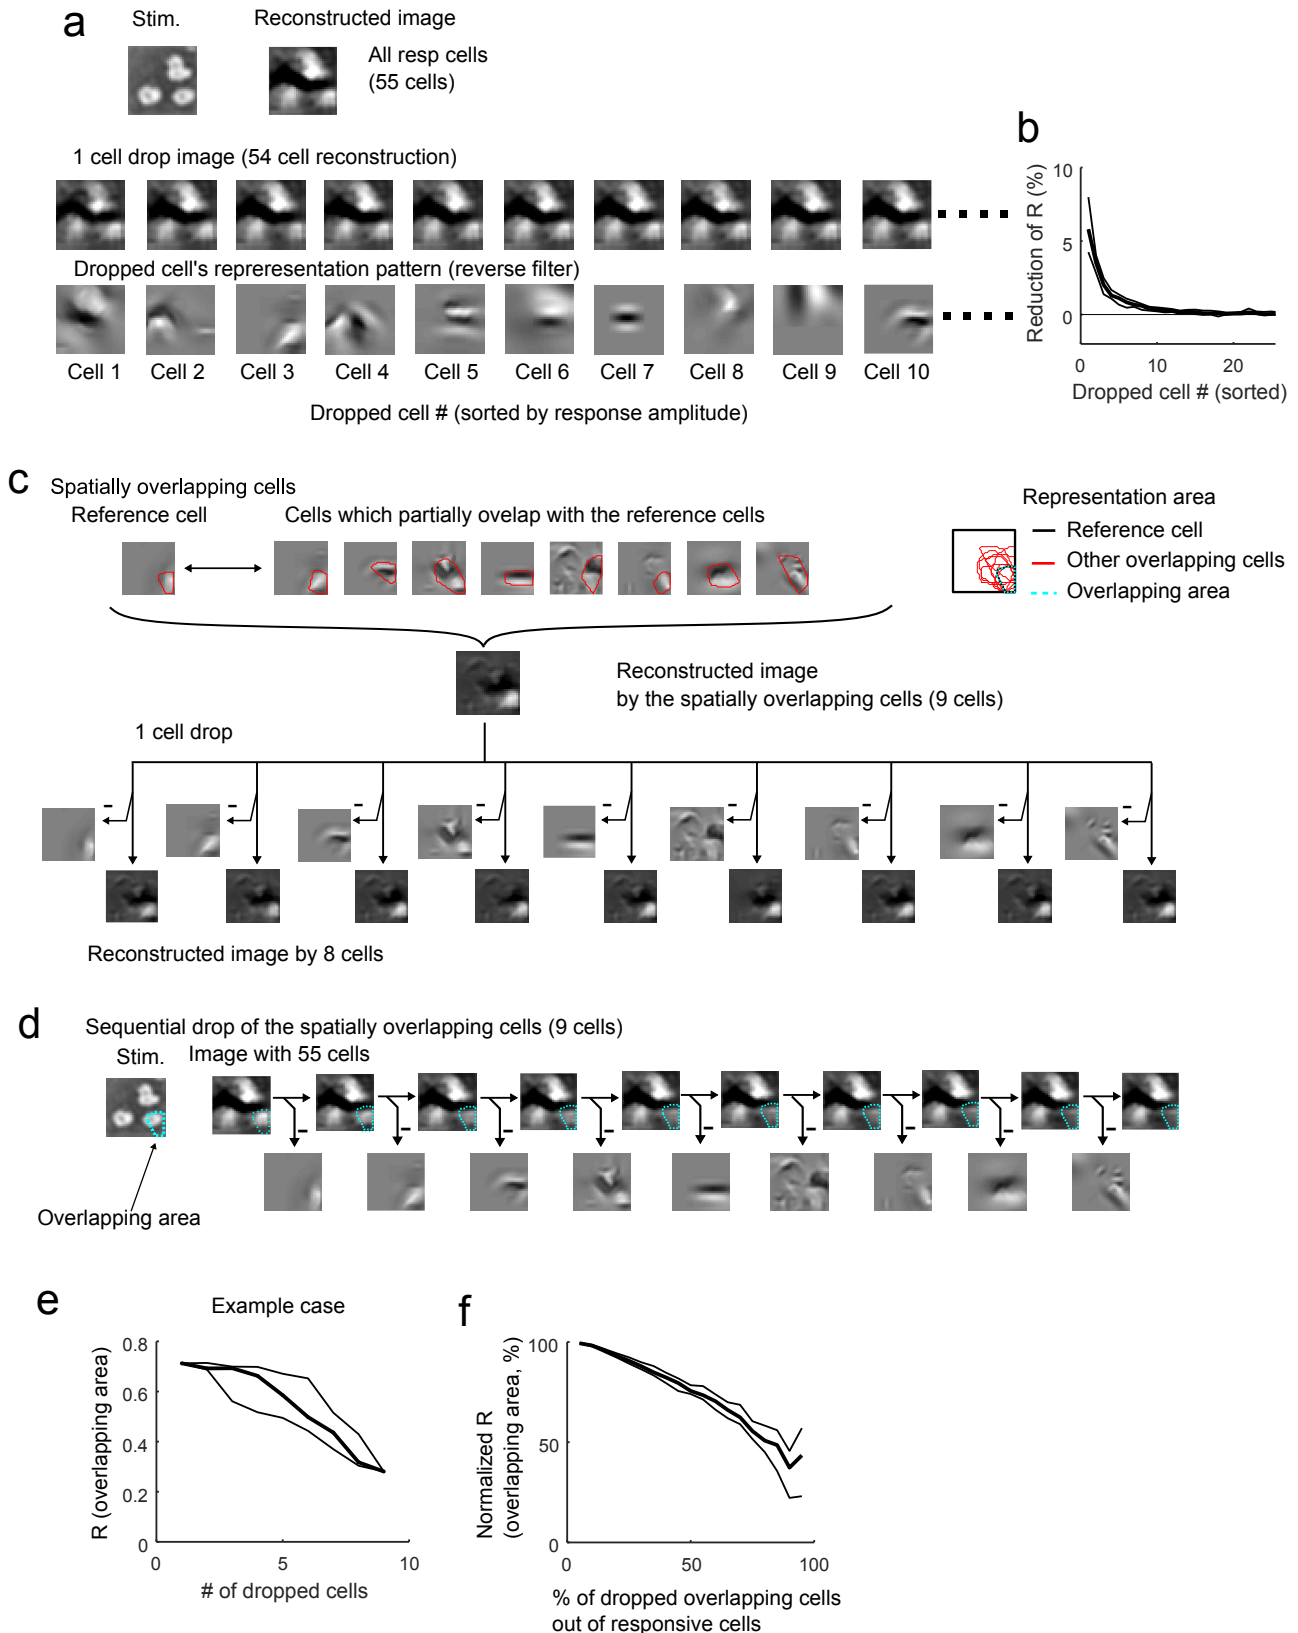

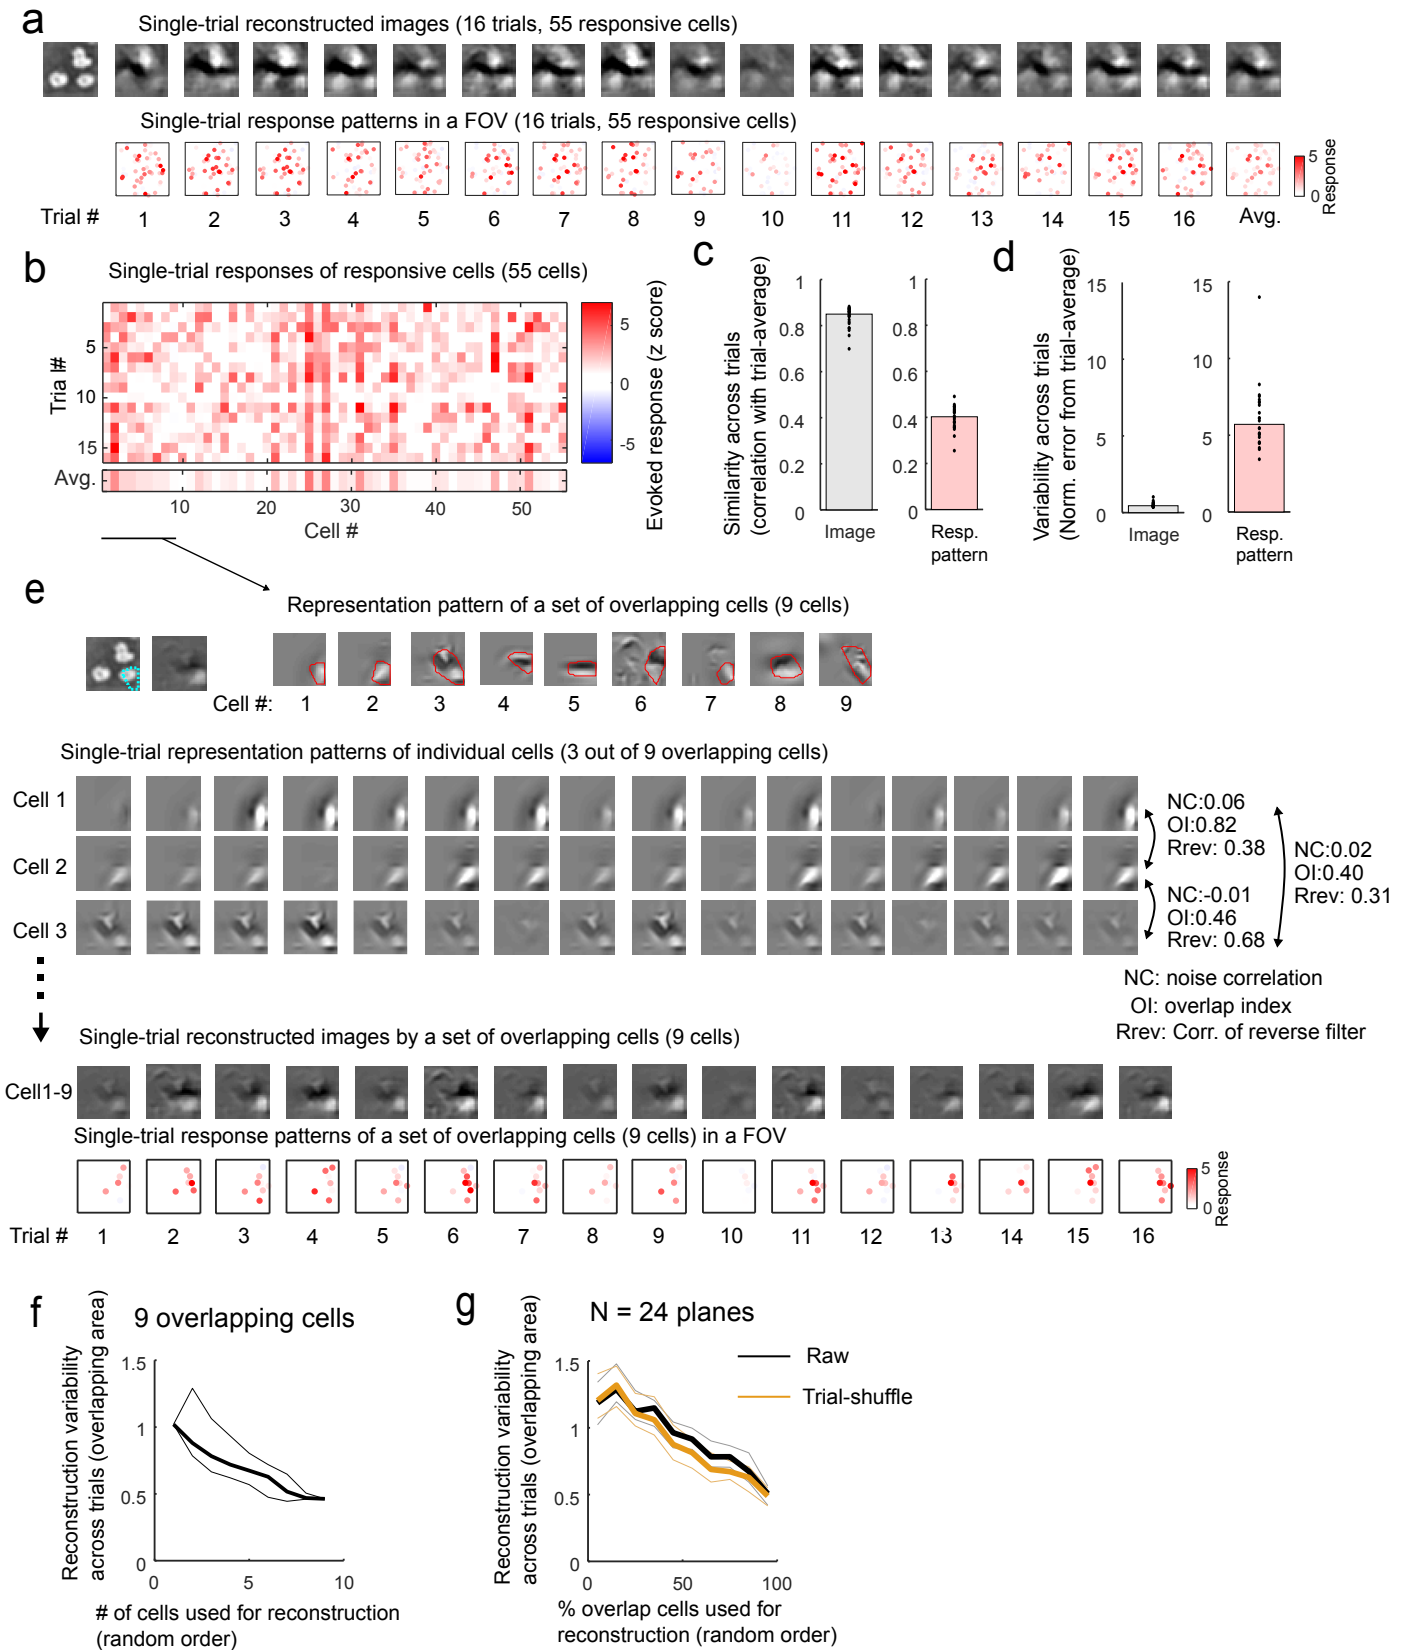



# Yoshida and Ohki, Figure 7

bioRxiv preprint doi: <https://doi.org/10.1101/300863>; this version posted December 12, 2019. The copyright holder for this preprint (which was not certified by peer review) is the author/funder. All rights reserved. No reuse allowed without permission.

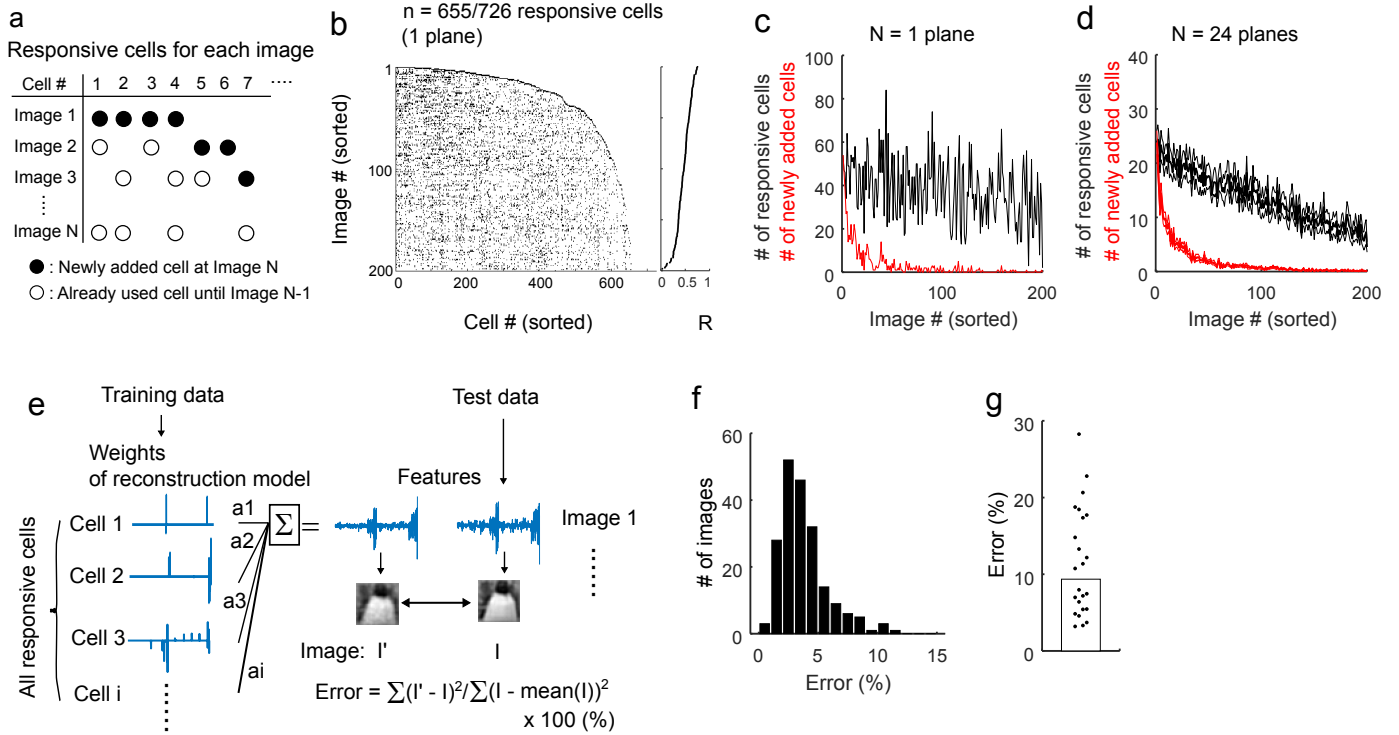

# Yoshida and Ohki, Figure 8

bioRxiv preprint doi: <https://doi.org/10.1101/300863>; this version posted December 12, 2019. The copyright holder for this preprint (which was not certified by peer review) is the author/funder. All rights reserved. No reuse allowed without permission.

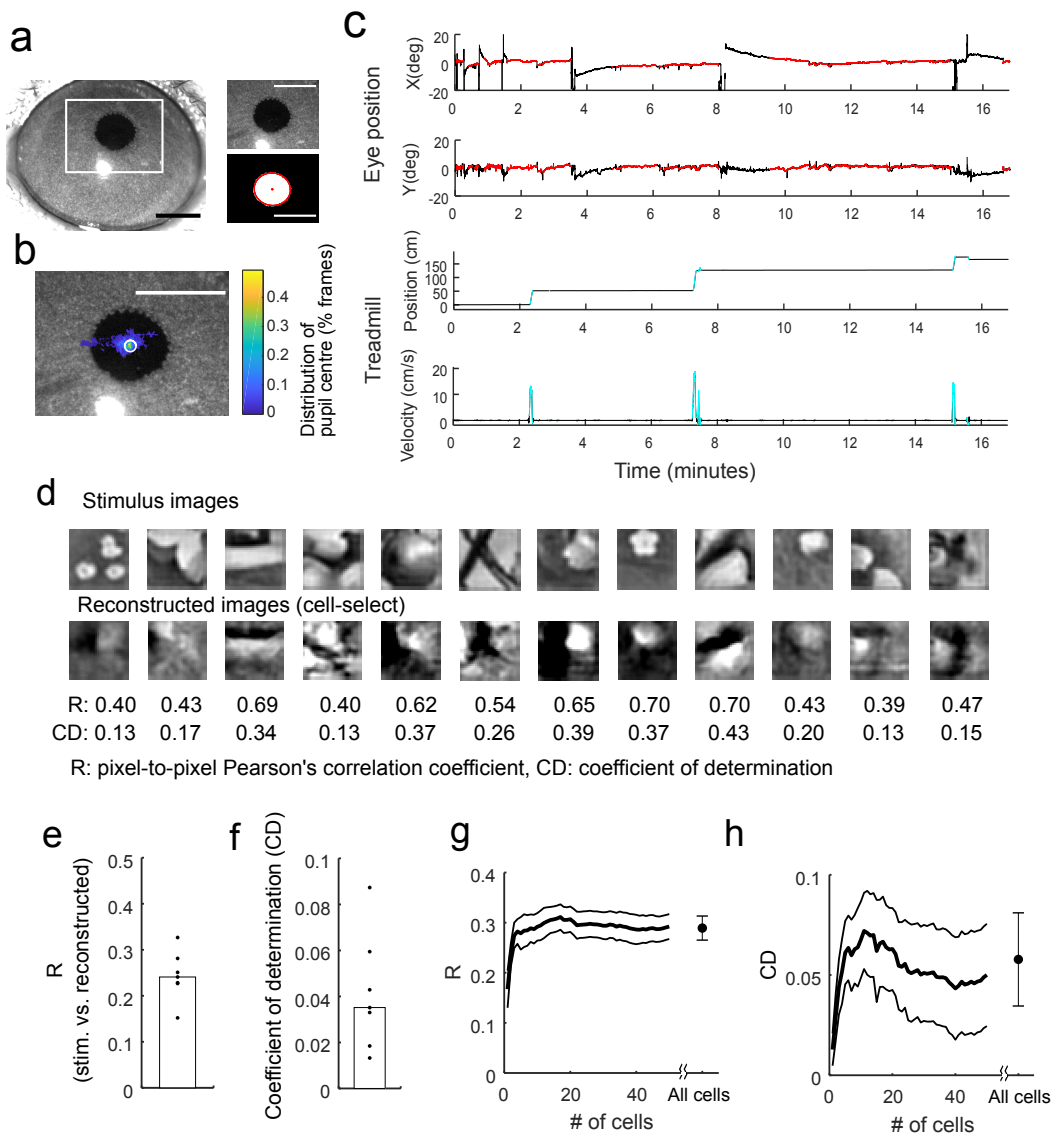

Source: https://www.biorxiv.org/content/10.1101/300863v3.full.pdf
